# Supplementary material for: Can 18F-FDG PET/CT predict EGFR status in patients with non-small cell lung cancer? A systematic review and meta-analysis
Source: PubMed Central journal article supplement — BMJ Open. 2021 Jun 8;11(6):e044313. doi: 10.1136/bmjopen-2020-044313 (PMC8190055; doi:10.1136/bmjopen-2020-044313), 2021-06-08
Supplement: bmjopen-2020-044313.draft_revisions.pdf [file bmjopen-2020-044313.draft_revisions.pdf]

# BMJ Open

BMJ Open is committed to open peer review. As part of this commitment we make the peer review history of every article we publish publicly available.

When an article is published we post the peer reviewers' comments and the authors' responses online. We also post the versions of the paper that were used during peer review. These are the versions that the peer review comments apply to.

The versions of the paper that follow are the versions that were submitted during the peer review process. They are not the versions of record or the final published versions. They should not be cited or distributed as the published version of this manuscript.

BMJ Open is an open access journal and the full, final, typeset and author-corrected version of record of the manuscript is available on our site with no access controls, subscription charges or pay-per-view fees (<http://bmjopen.bmj.com>).

If you have any questions on BMJ Open's open peer review process please email [info.bmjopen@bmj.com](mailto:info.bmjopen@bmj.com)

# BMJ Open

## Can 18F-FDG PET/CT predict EGFR status in NSCLC patients? A systematic review and meta-analysis

|                               |                                                                                                                                                                                                                                      |
|-------------------------------|--------------------------------------------------------------------------------------------------------------------------------------------------------------------------------------------------------------------------------------|
| Journal:                      | <i>BMJ Open</i>                                                                                                                                                                                                                      |
| Manuscript ID                 | bmjopen-2020-044313                                                                                                                                                                                                                  |
| Article Type:                 | Original research                                                                                                                                                                                                                    |
| Date Submitted by the Author: | 02-Sep-2020                                                                                                                                                                                                                          |
| Complete List of Authors:     | Du, Bulin; China Medical University First Hospital, Nuclear Medicine<br>Wang, Shu; China Medical University First Hospital, Nuclear Medicine<br>Li, Yaming ; China Medical University First Hospital, Department of Nuclear Medicine |
| Keywords:                     | Nuclear radiology < RADIOLOGY & IMAGING, Respiratory tract tumours < ONCOLOGY, GENETICS                                                                                                                                              |
|                               |                                                                                                                                                                                                                                      |

SCHOLARONE™  
Manuscripts

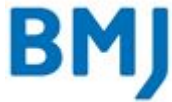

I, the Submitting Author has the right to grant and does grant on behalf of all authors of the Work (as defined in the below author licence), an exclusive licence and/or a non-exclusive licence for contributions from authors who are: i) UK Crown employees; ii) where BMJ has agreed a CC-BY licence shall apply, and/or iii) in accordance with the terms applicable for US Federal Government officers or employees acting as part of their official duties; on a worldwide, perpetual, irrevocable, royalty-free basis to BMJ Publishing Group Ltd ("BMJ") its licensees and where the relevant Journal is co-owned by BMJ to the co-owners of the Journal, to publish the Work in this journal and any other BMJ products and to exploit all rights, as set out in our [licence](#).

The Submitting Author accepts and understands that any supply made under these terms is made by BMJ to the Submitting Author unless you are acting as an employee on behalf of your employer or a postgraduate student of an affiliated institution which is paying any applicable article publishing charge ("APC") for Open Access articles. Where the Submitting Author wishes to make the Work available on an Open Access basis (and intends to pay the relevant APC), the terms of reuse of such Open Access shall be governed by a Creative Commons licence – details of these licences and which [Creative Commons](#) licence will apply to this Work are set out in our licence referred to above.

Other than as permitted in any relevant BMJ Author's Self Archiving Policies, I confirm this Work has not been accepted for publication elsewhere, is not being considered for publication elsewhere and does not duplicate material already published. I confirm all authors consent to publication of this Work and authorise the granting of this licence.

1  
2  
3 **Can  $^{18}\text{F}$ -FDG PET/CT predict EGFR status in NSCLC patients? A systematic review and**  
4 **meta-analysis**  
5  
6

7 Bulin Du, Shu Wang, Yaming Li\*  
8  
9

10 Department of Nuclear Medicine, The First Hospital of China Medical University, Shenyang  
11 110001, China.  
12  
13

14 \*Correspondence should be sent to:  
15

16 Yaming Li, Ph.D.  
17

18 Department of Nuclear Medicine  
19

20 The First Hospital of China Medical University  
21

22 No.155, North Nanjing Street, Shenyang, China. Zip code: 110001  
23

24 Email: ymli2001@163.com  
25  
26  
27  
28

29 **Key words**  $^{18}\text{F}$ -fluorodeoxyglucose; positron emission tomography/computed tomography;  
30 epidermal growth factor receptor; non-small cell lung cancer  
31  
32  
33

34 Word count: 3032  
35  
36  
37  
38  
39  
40  
41  
42  
43  
44  
45  
46  
47  
48  
49  
50  
51  
52  
53  
54  
55  
56  
57  
58  
59  
60

## Abstract

**Objectives:** This study aimed to explore the diagnostic significance of  $^{18}\text{F}$ -FDG PET/CT for predicting the presence of epidermal growth factor receptor (EGFR) mutations in non-small cell lung cancer (NSCLC) patients.

**Design:** A systematic review and meta-analysis.

**Data sources:** The PubMed, EMBASE and Cochrane library databases were searched from the earliest available date to August 2019.

**Eligibility criteria for selecting studies:** The review included primary studies that compared mean  $\text{SUV}_{\text{max}}$  between wild-type and mutant EGFR, and evaluated the diagnostic value of  $^{18}\text{F}$ -FDG PET/CT for prediction of EGFR status in NSCLC patients.

**Data extraction and synthesis:** The main purpose of the analysis was to assess the sensitivity and specificity, the DLR+ and DLR-, as well as the DOR. Each data point of the SROC graph was derived from a separate study. A pooled WMD was calculated using  $\text{SUV}_{\text{max}}$  extracted from the included studies. A random effects model was used for statistical analysis of the data and diagnostic performance for prediction was further assessed.

**Results** The pooled WMD of  $\text{SUV}_{\text{max}}$  between EGFR mutant and wild-type groups was -1.51 (95% CI: -2.16 - -0.87) from the 20 studies selected. Across 10 studies (2931 patients), the pooled sensitivity for  $^{18}\text{F}$ -FDG PET/CT was 0.65 (95% CI 0.52–0.77) with a pooled specificity of 0.62 (95% CI 0.53–0.71). The overall DLR+ was 1.74 (95% CI 1.45–2.10) and DLR- was 0.55 (95% CI 0.41–0.74). The pooled DOR was 3.15 (95% CI 2.06–4.84). The area under the SROC curve was 0.68 (95% CI 0.64–0.72). The likelihood ratio scatter plot based on average sensitivity and specificity, was in the lower right quadrant.

**Conclusion** Meta-analysis results showed  $^{18}\text{F}$ -FDG PET/CT had low pooled sensitivity and specificity. The low DOR and the likelihood ratio scatter plot indicated that  $^{18}\text{F}$ -FDG PET/CT should be used with caution when predicting EGFR mutations in NSCLC patients.

## Article summary

1  
2  
3 Strengths and limitations  
4  
5  
6

- 7 1. To our knowledge, this is the first review that systematically analyzes the diagnostic  
8 accuracy of  $^{18}\text{F}$ -FDG PET/CT for predicting EGFR status.  
9  
10 2. Weight mean difference analysis was performed prior to inclusion of studies in the  
11 diagnostic accuracy meta-analysis.  
12  
13 3. High heterogeneous effect should be mentioned in the results interpretation.  
14  
15  
16  
17  
18  
19  
20  
21  
22  
23  
24  
25  
26  
27  
28  
29  
30  
31  
32  
33  
34  
35  
36  
37  
38  
39  
40  
41  
42  
43  
44  
45  
46  
47  
48  
49  
50  
51  
52  
53  
54  
55  
56  
57  
58  
59  
60

## Introduction

Lung cancer is a common malignant tumor that is associated with considerable social and economic burden. Global statistics show that among malignant tumors, morbidity and mortality from lung cancer ranks first in males, while in females lung cancer is second only to breast cancer [1]. Non-small cell lung cancer (NSCLC) accounts for 85–90% of lung cancers, with lung adenocarcinomas (LUAD) being the most diagnosed histological subtype of NSCLC [2]. In Asia, up to 50% of LUAD patients have activating mutations of the tyrosine kinase domain of epidermal growth factor receptor (EGFR) [3]. Tyrosine-kinase inhibitor (TKI), which targets EGFR kinase domain mutations, seems to trigger a form of oncogenic shock, resulting in a favorable response in NSCLC [4]. Therefore, identification of EGFR mutant has been considered a prognostic marker for TKI therapy in NSCLC. The standard approach to detecting EGFR status is genetic testing, which is based on tumor specimens captured by invasive needle biopsy. However, this method does not reflect the status of the entire tumor.

Image-based phenotyping, which provides a non-invasive method to visualize tumor phenotypic characteristics, is a promising tool for precision medicine [5]. The use of positron emission tomography/computed tomography (PET/CT) as a molecular imaging modality for precision medicine is unique.  $^{18}\text{F}$ -fluorodeoxyglucose ( $^{18}\text{F}$ -FDG) PET/CT is widely used for cancer diagnosis and image-guided therapy. It has been reported that  $^{18}\text{F}$ -FDG PET/CT can predict EGFR status in NSCLC patients, but this remains controversial. Some studies have confirmed that higher uptake of  $^{18}\text{F}$ -FDG is predictive of mutant EGFR in NSCLC patients [6–8], while several studies have shown opposite result [9–11].

Although CT has been systematically analyzed to discover risk factors for EGFR mutations in NSCLC [12],  $^{18}\text{F}$ -FDG PET/CT was used to predict other biological features or other genetic mutations of certain malignancies through meta-analysis [13–15]. To our knowledge, no meta-analysis has summarized the association between  $^{18}\text{F}$ -FDG PET/CT and EGFR mutation status in NSCLC. The purpose of our study was to conduct a meta-analysis of the diagnostic performance of  $^{18}\text{F}$ -FDG PET/CT in predicting EGFR mutations, thereby providing more evidence for precise treatment of NSCLC patients.

## Methods

### Screening of publications

A systematic review of publications relevant to PET and EGFR mutations in NSCLC was undertaken using the electronic databases of PubMed, Embase and the Cochrane library from the earliest available date of indexing up to August 31, 2019. A search algorithm based on combined terms was used: (1) “FDG” OR “Fluorodeoxyglucose” OR “2-Fluoro-2-deoxyglucose” OR “2-Fluoro-2-deoxy-D-glucose” and (2) “PET” OR “positron emission tomography” and (3) “Epidermal Growth Factor Receptor” OR “EGFR” OR “c-erbB-1” OR “erbB-1” OR “v-erbB” and (4) “pulmonary cancer” OR “pulmonary cancer” OR “lung neoplasm” OR “lung cancer” and (5) “mutation”. In order to expand the scope of our search, we also screened the references of the included studies for other studies to include.

### Inclusion of studies and data extraction

Only original articles focusing on  $^{18}\text{F}$ -FDG PET/CT and EGFR status in NSCLC patients were eligible for inclusion. To compare the differences in  $^{18}\text{F}$ -FDG uptake between EGFR mutant and wild-type patients, the publications that reported mean  $\text{SUV}_{\text{max}}$  and standard deviations (SD) of EGFR mutant and wild-type groups were first selected. Next, articles using  $^{18}\text{F}$ -FDG PET/CT to predict EGFR status in NSCLC patients were included based on whether they provided sufficient data to re-evaluate the sensitivity and specificity, or provided absolute data including true-positive, true-negative, false-positive and false-negative without data overlap. Duplicate publications and publications that do not contain original data, such as case reports, conference papers, review articles and letters, were excluded. Non-relevant studies and basic research were also excluded. Two researchers independently reviewed the abstracts of the selected articles using the above inclusion criteria. The same researchers independently evaluated the full text to determine whether they were eligible for final inclusion.

### Quality assessment and publication bias

For WMD analysis, risk of bias, including random sequence generation, allocation concealment, blinding, incomplete outcome data and selective reporting were assessed. Publication bias was assessed using a funnel plot, and plot asymmetry was considered to be suggestive of publication bias. For diagnostic performance analysis, the Quality Assessment of Diagnostic Accuracy



1  
2  
3 Studies-2 (QUADAS-2) tool was employed to assess the risk of bias in diagnostic accuracy  
4 studies. The tool consisted of four domains of risk of bias, including patient selection, index test,  
5 reference standard and flow and timing. Publication bias was evaluated using a funnel plot and  
6 Egger's regression test.  
7  
8  
9

## 10 **Data synthesis and analysis**

11  
12  
13 A pooled weighted mean difference (WMD) was calculated through  $SUV_{max}$  extracted from the  
14 retrieved articles. A random effects model was used for statistical analysis of the data. Pooled  
15 data were displayed using forest plots and presented with 95% confidence intervals (CI). An  $I^2$   
16 test was performed to analysis the heterogeneity between studies ( $I^2$  value > 50% was considered  
17 significant). Diagnostic performance for prediction was further assessed. The main purpose was  
18 to assess the sensitivity and specificity, the positive and negative diagnostic likelihood ratios  
19 (DLR+ and DLR-, respectively), as well as the diagnostic odds ratio (DOR). Publication bias  
20 was evaluated using a Deeks' funnel plot of the effective sample size. The bivariate model  
21 allowed us to incorporate the correlation that might exist between the logit-transformed values of  
22 paired sensitivity and specificity across studies. Each data point of the summary receiver  
23 operator characteristic (SROC) graph was derived from a separate study. Based on these points,  
24 the smooth SROC curve was formed to reveal the accuracy of the pooled measures. The  
25 likelihood ratio scatter plots graphically showed summary spots of likelihood ratios obtained  
26 from the average sensitivity and specificity. Statistical analyses were performed using STATA  
27 15.1 (StataCorp LP, College Station, TX) and RevMan 5.3 (Cochrane Collaboration,  
28 Copenhagen, Denmark).  $p \leq 0.05$  was considered statistically significant.  
29  
30  
31  
32  
33  
34  
35  
36  
37  
38  
39  
40  
41

## 42 **Results**

### 43 **Literature search and selection of studies**

44  
45 The comprehensive search yielded 431 records for analysis. Records with duplicate titles and  
46 abstracts (69) were excluded. Additionally, 30 review articles, 122 conference abstracts, 8 basic  
47 research articles, 89 case reports, editorials, notes or surveys and 75 non-relevant or other  
48 language studies were excluded. The remaining 33 full-text articles were further assessed for  
49 eligibility. For calculating pooled WMD, 13 articles were excluded due to insufficient data and  
50 20 studies were included. For the pooled DOR analysis, 20 articles were excluded due to  
51 insufficient data and 3 articles were excluded due to inconsistent results according to pooled  
52  
53  
54  
55  
56  
57  
58  
59  
60

1  
2  
3 WMD results ( $^{18}\text{F}$ -FDG uptake was significantly lower in EGFR mutant group). The remaining  
4 10 studies were included in the meta-analysis. The detailed procedure of study selection is shown  
5 in Figure 1.  
6  
7

### 8 9 **Study description and publication bias**

10  
11 A total of 4341 patients were included in the analysis comparing  $\text{SUV}_{\text{max}}$  between the EGFR  
12 mutant and wild-type groups. The patients were enrolled retrospectively in all 20 of the included  
13 studies. The pooled comparison of the studies demonstrated that  $^{18}\text{F}$ -FDG uptake was  
14 significantly lower in the EGFR mutant group (WMD -1.51; 95% CI -2.16 - -0.87;  $p < 0.00001$ ;  
15  $I^2 = 78\%$ , Figure 2). The most common domains with reporting deficiencies related to the patient  
16 selection, as there was no random sequence generation for retrospective studies (Figure 3A).  
17 Visual analysis of the funnel plot was not suggestive of publication bias using Egger's test ( $p =$   
18  $0.994$ ; Figure 3B). The principal characteristics of the included 20 studies are shown in Table 1.  
19 In order to predict presence of EGFR mutations in NSCLC patients, a total of 2931 patients were  
20 included in the analysis, including 1686 male and 1245 female cases. The average age was 63  
21 years old, 88.6% had LUAD and 43.1% were smokers. All 10 studies enrolled patients  
22 retrospectively. The incidence rate of EGFR mutation was 42.4% with a range of 21.0%–57.5%.  
23  $\text{SUV}_{\text{max}}$  was used for interpretation of  $^{18}\text{F}$ -FDG PET/CT to predict the EGFR mutation status.  
24 The principal characteristics of the 10 included studies are shown in Table 1. Most of the  
25 observational studies demonstrated a low risk of bias as assessed by the QUADAS-2 tool (Figure  
26 4A). Deek's funnel plot asymmetry tests were performed to assess a possible publication bias.  
27 No significant bias was found ( $p = 0.13$ ; Figure 4B).  
28  
29  
30  
31  
32  
33  
34  
35  
36  
37  
38  
39  
40  
41  
42

### 43 **Diagnostic effectiveness of $^{18}\text{F}$ -FDG PET/CT**

44 The diagnostic effectiveness of  $^{18}\text{F}$ -FDG PET/CT in predicting EGFR mutation in NSCLC  
45 patients was meta-analyzed across 10 studies. The pooled sensitivity was 0.65 (95% CI 0.52–  
46 0.77) with heterogeneity ( $I^2 = 91.29$ , 95% CI 87.23–95.35,  $p = 0.00$ ). The pooled specificity was  
47 0.62 (95% CI 0.53–0.71) with heterogeneity ( $I^2 = 93.05$ , 95% CI 90.01–96.08,  $p = 0.00$ ; Figure  
48 5). DLR syntheses gave an overall DLR+ of 1.74 (95% CI 1.45–2.10) and DLR– of 0.55 (95%  
49 CI 0.41–0.74; Figure 6). The pooled DOR was 1.15 (95% CI 0.72–1.58) and 3.15 (95% CI 2.06–  
50 4.84; Figure 6). The AUC obtained from SROC was 0.68 (95% CI 0.64–0.72; Figure 7A).  
51  
52  
53  
54  
55  
56  
57  
58  
59  
60

### Likelihood ratio scatter plot

The summary value of likelihood ratios obtained from the average sensitivity and specificity shown in the likelihood ratio scatter plot (Figure 7B) was located in the lower right quadrant, which indicated that  $^{18}\text{F}$ -FDG PET/CT may not be useful for predicting whether there is an EGFR mutation (when positive) or not (when negative).

### Discussion

In light of the advances in the precise treatment of lung cancer, identifying targetable mutations at the time of diagnosis has become the key to determining the best treatment strategies. The EGFR mutation is an important molecular subtype of NSCLC, which is highly sensitive to anti-EGFR TKI therapy. The clinical outcome of the NSCLC patients harboring EGFR alteration was significantly improved by three different generations of EGFR TKIs. The identification of the EGFR mutation led to an important paradigm shift in the treatment and survival of NSCLC patients. Tissue biopsy is the current gold standard for genetic identification and analysis. Unfortunately, this procedure usually results in failure or poor reproducibility due to insufficient materials. Another emerging strategy is plasma genotyping through “liquid biopsy”, a technique that can identify target mutant gene in circulating cell-free tumor DNA. However, inconsistencies between EGFR mutation status obtained from plasma and tumor DNA samples has also been found [16]. Moreover, neither biopsies nor plasma samples can provide accurate anatomical information such as position, size, boundary and relationship with adjacent structures of the tumors, which is critical for clinical treatment planning and response assessment.

Molecular imaging is an attractive option for evaluating NSCLC patients receiving targeted treatment because it can noninvasively observe the molecular and genomic characteristics of the tumor. As a typical molecular imaging technique,  $^{18}\text{F}$ -FDG PET/CT can identify areas of increased metabolic activity by measuring  $^{18}\text{F}$ -FDG uptake in many malignancies including NSCLC. Semi-quantitative parameters can be used for PET image analysis, with  $\text{SUV}_{\text{max}}$  being the most effective and commonly used parameter.  $^{18}\text{F}$ -FDG PET/CT has also been used in the assessment of genetic status.

Previous studies on the value of  $^{18}\text{F}$ -FDG PET in predicting EGFR status have been conflicting. Accumulation of  $^{18}\text{F}$ -FDG was reported to be lower in NSCLC patients, which can be used to predict EGFR status. Na et al. first reported that patients with low  $\text{SUV}_{\text{max}}$  were more

likely to have EGFR mutations than those with high  $SUV_{max}$ . When using 9.2 as the cut-off value, the specificity and sensitivity reached 72% and 67%, respectively [17]. Lee et al. concluded that  $^{18}F$ -FDG avidity had no significant clinical value in predicting EGFR status, while the univariate analysis showed  $SUV_{max}$  was significantly correlated with EGFR mutation using 11.7 as the cut-off value [18]. Cho et al. also found that mutant EGFR had relatively lower glycolysis compared with wild-type EGFR. A cut-off  $SUV_{max}$  value of 9.6 had the highest sensitivity (79.3 %) in predicting EGFR mutation [19]. Research by Guan et al. showed that  $^{18}F$ -FDG uptake values could effectively predict the EGFR mutation status of NSCLC patients. ROC curve analysis revealed the AUC was 0.65 with the  $SUV_{max}$  value of 8.1 as the cut-off point [20]. Next, other studies further demonstrated that low  $SUV_{max}$  was a significant predictor of EGFR mutations using different cut off values [6, 7, 21–23]. Chen et al. demonstrated that using 9.92 as the  $SUV_{max}$  cut-off point can best discriminate the EGFR mutation status with an AUC of 0.75, and they identified that the mechanism responsible for the decreased FDG uptake associated with mutant EGFR was through the NOX4/ROS/GLUT1 axis [8].

However, multiple groups have reported no association between  $SUV_{max}$  and EGFR status. Mak et al. reported that high normalized  $SUV_{max}$  only correlated with the EGFR wild-type genotype [24]. Moreover, several studies have reported conflicting results. Huang et al. found that a higher  $^{18}F$ -FDG uptake with a  $SUV_{max}$  cut-off value of 9.5 correlates with the presence of EGFR mutations [9]. Ko et al. showed a trend of higher  $SUV_{max}$  in patients with an EGFR mutation, with an optimal cut-off was 6 [11]. Kanmaz et al. made a similar conclusion, with an  $SUV_{max}$  cut-off value of 13.65 as the predictor [10].

For the conflicting information from the above studies, comparison of mean  $SUV_{max}$  between EGFR mutant and wild-type was first pooled with WMD to determine the relationship between EGFR status and FDG uptake. According to result of WMD meta-analysis,  $^{18}F$ -FDG uptake was significantly lower in the EGFR mutant group. Thus, only studies that reported lower  $^{18}F$ -FDG uptake for prediction of EGFR mutation in NSCLC patients were included in the DOR analysis. The meta-analysis showed low pooled sensitivity and specificity for prediction. The low DOR as well as the likelihood ratio scatter plot indicated that  $^{18}F$ -FDG PET/CT might not be useful—or, at least, should be used with caution—for predicting EGFR mutations in NSCLC patients. In addition, the obvious heterogeneity, especially for the main parameters, indicated that the differences between studies cannot be ignored and conclusion should be drawn carefully.

To improve diagnostic efficacy, recent studies focused on  $^{18}\text{F}$ -FDG PET/CT radiomics [25, 26]. Radiomics refers to the extraction of quantitative characteristics from medical images [27]. The PET/CT-based radiomic characteristics showed good performance in the prediction of EGFR mutation in NSCLC patients [28]. Although the prediction efficacy improved, its clinical application requires additional studies to confirm and optimize. Beyond  $^{18}\text{F}$ -FDG, novel radiotracers have also been investigated.  $^{18}\text{F}$ -MPG PET/CT was demonstrated to be a valid strategy for stratifying NSCLC patients with EGFR-activating mutations for EGFR-TKI treatment [29]. Other promising studies are under way to translate these novel approaches into the clinic to guide effective precision therapy for NSCLC patients.

The main limitation of this study is the high level of heterogeneity. However, this can be addressed using a random effects model. The first area of heterogeneity is related to NSCLC subtypes. LUAD is the main pathological type of NSCLC, but even within LUAD, there are different subtypes. For example, alveolar carcinoma demonstrates relatively low  $^{18}\text{F}$ -FDG uptake. Second,  $\text{SUV}_{\text{max}}$  is the most stable and commonly used index, but there are many factors that affect  $\text{SUV}_{\text{max}}$ , including tumor size, glucose level, image acquisition and reconstruction. Third, the number of studies included in this study was small, especially for subgroup analysis. To further study these issues, an increased number of high-quality studies need to be carried out in the future.

## Conclusion

Our meta-analysis results showed that  $^{18}\text{F}$ -FDG PET/CT had low pooled sensitivity and specificity for EGFR mutation prediction. The low DOR and the likelihood ratio scatter plot indicated that  $^{18}\text{F}$ -FDG PET/CT might not be useful—or, at least, that it should be used with caution—for predicting EGFR mutations in NSCLC patients.

## Author contributions

BD is the first author. BL and YL obtained funding. BD and YL designed the study. BD and SW collected and analyzed the data. BD drafted the manuscript. BD and YL contributed to the interpretation of the results and critical revision of the manuscript for important intellectual

1  
2  
3 content, and approved the final version of the manuscript. All authors have read and approved  
4 the final manuscript. BD and YL are the study guarantors.  
5  
6

### 7 **Funding**

8  
9 This work was supported by the National Natural Science Foundation of China (81971652) and  
10 Young Scholars Program of China Medical University (QGZ-2018036).  
11  
12

### 13 **Competing interests**

14  
15 We have read and understood the BMJ policy on declaration of interests and declare that we  
16 have no competing interests.  
17  
18

### 19 **Data sharing**

20 No additional data are available  
21  
22

### 23 **Patient and public involvement**

24 No patient involved  
25  
26  
27  
28  
29  
30  
31  
32  
33  
34  
35  
36

### 37 **References**

- 38  
39  
40  
41 1 Ferlay J, Colombet M, Soerjomataram I, et al. Estimating the global cancer incidence and mortality  
42 in 2018: GLOBOCAN sources and methods. *Int J Cancer* 2019;144(8):1941–53.  
43  
44 2 Travis WD. Pathology of lung cancer. *Clin Chest Med* 2011;32(4):669–92.  
45  
46 3 McLoughlin EM, Gentzler RD. Epidermal Growth Factor Receptor Mutations. *Thorac Surg Clin*  
47 2020;30(2):127–36.  
48  
49 4 Sharma SV, Bell DW, Settleman J, et al. Epidermal growth factor receptor mutations in lung cancer.  
50 *Nat Rev Cancer* 2007;7(3):169–81.  
51  
52 5 Aerts HJWL. The Potential of Radiomic-Based Phenotyping in Precision Medicine: A Review.  
53 *JAMA Oncol* 2016;2(12):1636–42.  
54  
55  
56  
57  
58  
59  
60

- 1  
2  
3 6 Yang B, Wang QG, Lu M, et al. Correlations Study Between 18F-FDG PET/CT Metabolic  
4 Parameters Predicting Epidermal Growth Factor Receptor Mutation Status and Prognosis in Lung  
5 Adenocarcinoma. *Front Oncol* 2019;9:589.  
6  
7 7 Zhu L, Yin G, Chen W, et al. Correlation between EGFR mutation status and F18 -  
8 fluorodeoxyglucose positron emission tomography-computed tomography image features in lung  
9 adenocarcinoma. *Thorac Cancer* 2019;10(4):659–64.  
10  
11 8 Chen L, Zhou Y, Tang X, et al. EGFR mutation decreases FDG uptake in non-small cell lung cancer  
12 via the NOX4/ROS/GLUT1 axis. *Int J Oncol* 2019;54(1):370–80.  
13  
14 9 Huang C-T, Yen R-F, Cheng M-F, et al. Correlation of F-18 fluorodeoxyglucose-positron emission  
15 tomography maximal standardized uptake value and EGFR mutations in advanced lung  
16 adenocarcinoma. *Med Oncol* 2010;27(1):9–15.  
17  
18 10 Kanmaz ZD, Aras G, Tuncay E, et al. Contribution of <sup>18</sup>F-fluorodeoxyglucose positron emission  
19 tomography uptake and TTF-1 expression in the evaluation of the EGFR mutation in patients with  
20 lung adenocarcinoma. *Cancer Biomark* 2016;16(3):489–98.  
21  
22 11 Ko K-H, Hsu H-H, Huang T-W, et al. Value of <sup>18</sup>F-FDG uptake on PET/CT and CEA level to  
23 predict epidermal growth factor receptor mutations in pulmonary adenocarcinoma. *Eur J Nucl Med*  
24 *Mol Imaging* 2014;41(10):1889–97.  
25  
26 12 Zhang H, Cai W, Wang Y, et al. CT and clinical characteristics that predict risk of EGFR mutation  
27 in non-small cell lung cancer: a systematic review and meta-analysis. *Int J Clin Oncol*  
28 2019;24(6):649–59.  
29  
30 13 Ayati N, Sadeghi R, Kiamanesh Z, et al. The value of 18F-FDG PET/CT for predicting or  
31 monitoring immunotherapy response in patients with metastatic melanoma: a systematic review and  
32 meta-analysis. *Eur J Nucl Med Mol Imaging* 2020.  
33  
34 14 Kim S-J, Pak K, Kim K. Diagnostic performance of F-18 FDG PET/CT for prediction of KRAS  
35 mutation in colorectal cancer patients: a systematic review and meta-analysis. *Abdom Radiol (NY)*  
36 2019;44(5):1703–11.  
37  
38 15 Machado Medeiros T, Altmayer S, Watte G, et al. 18F-FDG PET/CT and whole-body MRI  
39 diagnostic performance in M staging for non-small cell lung cancer: a systematic review and meta-  
40 analysis. *Eur Radiol* 2020;30(7):3641–49.  
41  
42 16 Del Re M, Crucitta S, Gianfilippo G, et al. Understanding the Mechanisms of Resistance in EGFR-  
43 Positive NSCLC: From Tissue to Liquid Biopsy to Guide Treatment Strategy. *Int J Mol Sci*  
44 2019;20(16).  
45  
46 17 Im Na I, Byun BH, Kim KM, et al. 18F-FDG uptake and EGFR mutations in patients with non-  
47 small cell lung cancer: a single-institution retrospective analysis. *Lung Cancer* 2010;67(1):76–80.  
48  
49  
50  
51  
52  
53  
54  
55  
56  
57  
58  
59

- 1  
2  
3 18 Lee SM, Bae SK, Jung SJ, et al. FDG uptake in non-small cell lung cancer is not an independent  
4 predictor of EGFR or KRAS mutation status: a retrospective analysis of 206 patients. *Clin Nucl*  
5 *Med* 2015;40(12):950–58.  
6  
7 19 Cho A, Hur J, Moon YW, et al. Correlation between EGFR gene mutation, cytologic tumor markers,  
8 18F-FDG uptake in non-small cell lung cancer. *BMC Cancer* 2016;16:224.  
9  
10 20 Guan J, Xiao NJ, Chen M, et al. 18F-FDG uptake for prediction EGFR mutation status in non-small  
11 cell lung cancer. *Medicine (Baltimore)* 2016;95(30):e4421.  
12  
13 21 Gu J, Xu S, Huang L, et al. Value of combining serum carcinoembryonic antigen and PET/CT in  
14 predicting EGFR mutation in non-small cell lung cancer. *J Thorac Dis* 2018;10(2):723–31.  
15  
16 22 Takamochi K, Mogushi K, Kawaji H, et al. Correlation of EGFR or KRAS mutation status with  
17 18F-FDG uptake on PET-CT scan in lung adenocarcinoma. *PLoS ONE* 2017;12(4):e0175622.  
18  
19 23 Lv Z, Fan J, Xu J, et al. Value of 18F-FDG PET/CT for predicting EGFR mutations and positive  
20 ALK expression in patients with non-small cell lung cancer: a retrospective analysis of 849 Chinese  
21 patients. *Eur J Nucl Med Mol Imaging* 2018;45(5):735–50.  
22  
23 24 Mak RH, Digumarthy SR, Muzikansky A, et al. Role of 18F-Fluorodeoxyglucose Positron Emission  
24 Tomography in Predicting Epidermal Growth Factor Receptor Mutations in Non-Small Cell Lung  
25 Cancer. *Oncologist* 2011;16(3):319–26.  
26  
27 25 Li X, Yin G, Zhang Y, et al. Predictive Power of a Radiomic Signature Based on 18F-FDG PET/CT  
28 Images for EGFR Mutational Status in NSCLC. *Front Oncol* 2019;9:1062.  
29  
30 26 Nair JKR, Saeed UA, McDougall CC, et al. Radiogenomic Models Using Machine Learning  
31 Techniques to Predict EGFR Mutations in Non-Small Cell Lung Cancer. *Can Assoc Radiol J*  
32 2020:846537119899526.  
33  
34 27 Park H, Sholl LM, Hatabu H, et al. Imaging of Precision Therapy for Lung Cancer: Current State of  
35 the Art. *Radiology* 2019;293(1):15–29.  
36  
37 28 Zhang J, Zhao X, Zhao Y, et al. Value of pre-therapy 18F-FDG PET/CT radiomics in predicting  
38 EGFR mutation status in patients with non-small cell lung cancer. *Eur J Nucl Med Mol Imaging*  
39 2020;47(5):1137–46.  
40  
41 29 Sun X, Xiao Z, Chen G, et al. A PET imaging approach for determining EGFR mutation status for  
42 improved lung cancer patient management. *Sci Transl Med* 2018;10(431).  
43  
44 30 Caicedo C, Garcia-Velloso MJ, Lozano MD, et al. Role of <sup>18</sup>F-FDG PET in prediction of KRAS and  
45 EGFR mutation status in patients with advanced non-small-cell lung cancer. *Eur J Nucl Med Mol*  
46 *Imaging* 2014;41(11):2058–65.  
47  
48 31 Choi Y-J, Cho BC, Jeong YH, et al. Correlation between (18)f-fluorodeoxyglucose uptake and  
49 epidermal growth factor receptor mutations in advanced lung cancer. *Nucl Med Mol Imaging*  
50 2012;46(3):169–75.  
51  
52  
53  
54  
55  
56  
57  
58  
59  
60



- 1  
2  
3 32 Choi H, Paeng JC, Kim D-W, et al. Metabolic and metastatic characteristics of ALK-rearranged  
4 lung adenocarcinoma on FDG PET/CT. *Lung Cancer* 2013;79(3):242–47.  
5  
6 33 Chung HW, Lee KY, Kim HJ, et al. FDG PET/CT metabolic tumor volume and total lesion  
7 glycolysis predict prognosis in patients with advanced lung adenocarcinoma. *J Cancer Res Clin*  
8 *Oncol* 2014;140(1):89–98.  
9  
10 34 Kim TJ, Lee C-T, Jheon SH, et al. Radiologic Characteristics of Surgically Resected Non-Small  
11 Cell Lung Cancer With ALK Rearrangement or EGFR Mutations. *The Annals of Thoracic Surgery*  
12 2016;101(2):473–80.  
13  
14 35 Kim Y-I, Paeng JC, Park YS, et al. Relation of EGFR Mutation Status to Metabolic Activity in  
15 Localized Lung Adenocarcinoma and Its Influence on the Use of FDG PET/CT Parameters in  
16 Prognosis. *AJR Am J Roentgenol* 2018;210(6):1346–51.  
17  
18 36 Lee EYP, Khong P-L, Lee VHF, et al. Metabolic phenotype of stage IV lung adenocarcinoma:  
19 relationship with epidermal growth factor receptor mutation. *Clin Nucl Med* 2015;40(3):e190-5.  
20  
21 37 Minamimoto R, Jamali M, Gevaert O, et al. Prediction of EGFR and KRAS Mutation in Non-Small  
22 Cell Lung Cancer Using Quantitative 18 F FDG-PET/CT Metrics. *Oncotarget* 2017;8(32).  
23  
24 38 Qiang G, Huang W, Liang C, et al. Association between histopathological subtype, 18F-  
25 fluorodeoxyglucose uptake and epidermal growth factor receptor mutations in lung adenocarcinoma.  
26 *Oncol Lett* 2016;11(3):1769–77.  
27  
28 39 Suárez-Piñera M, Belda-Sanchis J, Taus A, et al. FDG PET-CT SUVmax and IASLC/ATS/ERS  
29 histologic classification: a new profile of lung adenocarcinoma with prognostic value. *Am J Nucl*  
30 *Med Mol Imaging* 2018;8(2):100–09.  
31  
32  
33  
34  
35  
36  
37  
38  
39  
40  
41  
42  
43  
44  
45  
46  
47  
48  
49  
50  
51  
52  
53  
54  
55  
56  
57  
58  
59  
60

**Table 1** Characteristics of the included studies

| Authors            | Year | Country | Study design | Patient number | Age (mean) | Gender (M/F) | Smoker | LUAD | Genetic test | EGFR mutant /wild-type | <sup>18</sup> F-FDG injection dose | Cut-off value | Meta-analysis |
|--------------------|------|---------|--------------|----------------|------------|--------------|--------|------|--------------|------------------------|------------------------------------|---------------|---------------|
| Caicedo et al [30] | 2014 | Spain   | R            | 102            | 62         | 62/40        | 73     | 90   | PCR          | 22/80                  | NA                                 | NA            | WMD           |
| Chen et al [8]     | 2019 | China   | R            | 157            | 66         | 84/73        | 68     | 144  | PCR          | 54/103                 | 481 MBq                            | 9.92          | WMD/ DOR      |
| Cho et al [19]     | 2016 | Korea   | R            | 61             | 61         | 33/28        | 29     | 58   | PCR          | 30/31                  | 5.5 MBq/kg                         | 9.6           | WMD/ DOR      |
| Choi et al [31]    | 2012 | Korea   | R            | 163            | 60         | 99/64        | 73     | 130  | PCR          | 57/106                 | 5.18 MBq/kg                        | NA            | WMD           |
| Choi et al [32]    | 2013 | Korea   | R            | 331            | 62         | 158/173      | 145    | 331  | PCR          | 156/175                | 5.18 MBq/kg                        | NA            | WMD           |
| Chung et al [33]   | 2010 | Korea   | R            | 106            | 64         | 63/43        | 60     | 97   | PCR          | 42/64                  | 4.8 MBq/kg                         | NA            | WMD           |
| Gu et al [21]      | 2017 | China   | R            | 210            | 59         | 132/78       | 90     | 161  | PCR          | 70/140                 | 5.18 MBq/kg                        | 9             | DOR           |
| Guan et al [20]    | 2016 | China   | R            | 316            | 60         | 216/100      | 162    | 242  | PCR          | 126/190                | NA                                 | 8.1           | WMD/ DOR      |
| Huang et al [9]    | 2010 | China   | R            | 77             | 62         | 44/33        | 16     | 77   | PCR          | 49/28                  | 370MBq                             | NA            | WMD           |

|                          |      |        |   |     |    |         |     |     |     |         |                |      |          |
|--------------------------|------|--------|---|-----|----|---------|-----|-----|-----|---------|----------------|------|----------|
| Kanmaz et al [10]        | 2016 | Turkey | R | 218 | 62 | 151/67  | 155 | 218 | PCR | 63/155  | 3.7~5.2 MBq/kg | NA   | WMD      |
| Kim et al [34]           | 2016 | Korea  | R | 198 | 62 | 113/85  | 68  | 183 | PCR | 101/97  | 5.18 MBq/kg    | NA   | WMD      |
| Kim et al [35]           | 2018 | Korea  | R | 232 | 64 | 104/128 | 93  | 232 | PCR | 132/100 | 5.18 MBq/kg    | NA   | WMD      |
| Lee et al [18]           | 2015 | Korea  | R | 206 | 68 | 148/58  | 71  | 135 | PCR | 47/159  | 481 MBq        | 11.7 | DOR      |
| Lee et al [36]           | 2015 | China  | R | 71  | 65 | 33/38   | 19  | 71  | PCR | 48/23   | 370 MBq        | NA   | WMD      |
| Lv et al [23]            | 2018 | China  | R | 808 | 59 | 468/340 | 310 | 731 | PCR | 371/437 | 5.5 MBq/kg     | 7    | WMD/ DOR |
| Mak et al [24]           | 2011 | USA    | R | 100 | 65 | 39/61   | 73  | 90  | PCR | 24/76   | 5.55~7.4MBq    | NA   | WMD      |
| Minamimoto et al [37]    | 2017 | USA    | R | 127 | 67 | NA      | NA  | 127 | PCR | 32/95   | 12~17 mCi      | NA   | WMD      |
| Na et al [17]            | 2010 | Korea  | R | 100 | 64 | 68/32   | 57  | 53  | PCR | 21/79   | 370 MBq        | 9.2  | DOR      |
| Qiang et al [38]         | 2016 | China  | R | 97  | 65 | 50/47   | 51  | 97  | PCR | 44/53   | 7.4 MBq/kg     | NA   | WMD      |
| Suárez-Piñera et al [39] | 2018 | Spain  | R | 106 | 71 | NA      | NA  | 106 | PCR | 24/82   | 5.29 MBq/kg    | NA   | WMD      |

|                      |      |       |   |     |    |         |     |     |     |         |                 |       |          |
|----------------------|------|-------|---|-----|----|---------|-----|-----|-----|---------|-----------------|-------|----------|
| Takamochi et al [22] | 2017 | Japan | R | 734 | 68 | 367/367 | 363 | 734 | PCR | 334/400 | 3.5 MBq/kg      | 2.69  | WMD/ DOR |
| Yang et al [6]       | 2019 | China | R | 200 | 61 | 108/92  | 68  | 200 | PCR | 115/85  | 3.7~6.66 MBq/kg | 6.15  | WMD/ DOR |
| Zhu et al [7]        | 2018 | China | R | 139 | 62 | 62/77   | 46  | 139 | PCR | 74/65   | 4.2 MBq/kg      | 11.19 | WMD/ DOR |

LUAD, Lung adenocarcinoma; WMD, weighted mean difference; DOR, diagnostic odds ratio.

1  
2  
3 **Figure 1** Publication screening flowchart.  
4

5  
6 **Figure 2** Forest plot for analysis of  $^{18}\text{F}$ -FDG uptake in EGFR mutant versus wild-type in  
7 NSCLC patients.  
8

9  
10 **Figure 3 A:** Risk of bias of included studies. **B:** funnel plot of  $\text{SUV}_{\text{max}}$  in EGFR mutant versus  
11 wild-type in NSCLC patients.  
12

13  
14 **Figure 4 A:** Assessment of risk of bias of the included studies using QUADAS-2 tool. **B:**  
15 Deeks's funnel plot of asymmetry test for publication bias showed no significant bias was found.  
16 QUADAS-2, Quality Assessment of Diagnostic Accuracy Studies-2; WMD: weighted mean  
17 difference; ESS: effective sample size.  
18  
19

20  
21  
22 **Figure 5** Forest plot of pooled sensitivity and specificity of  $^{18}\text{F}$ -FDG PET/CT for predicting  
23 EGFR mutations in NSCLC patients.  
24

25  
26 **Figure 6** Forest plot of pooled positive, negative DLR and DOR of  $^{18}\text{F}$ -FDG PET/CT for  
27 predicting EGFR mutations in NSCLC patients.  
28

29  
30 **Figure 7 A:** Summary receiver operating characteristic (SROC) curves of  $^{18}\text{F}$ -FDG PET/CT for  
31 predicting EGFR mutations in NSCLC patients. **B:** Likelihood ratio scatter plot of  $^{18}\text{F}$ -FDG  
32 PET/CT predicting EGFR mutations in NSCLC patients.  
33  
34  
35  
36  
37  
38  
39  
40  
41  
42  
43  
44  
45  
46  
47  
48  
49  
50  
51  
52  
53  
54  
55  
56  
57  
58  
59  
60

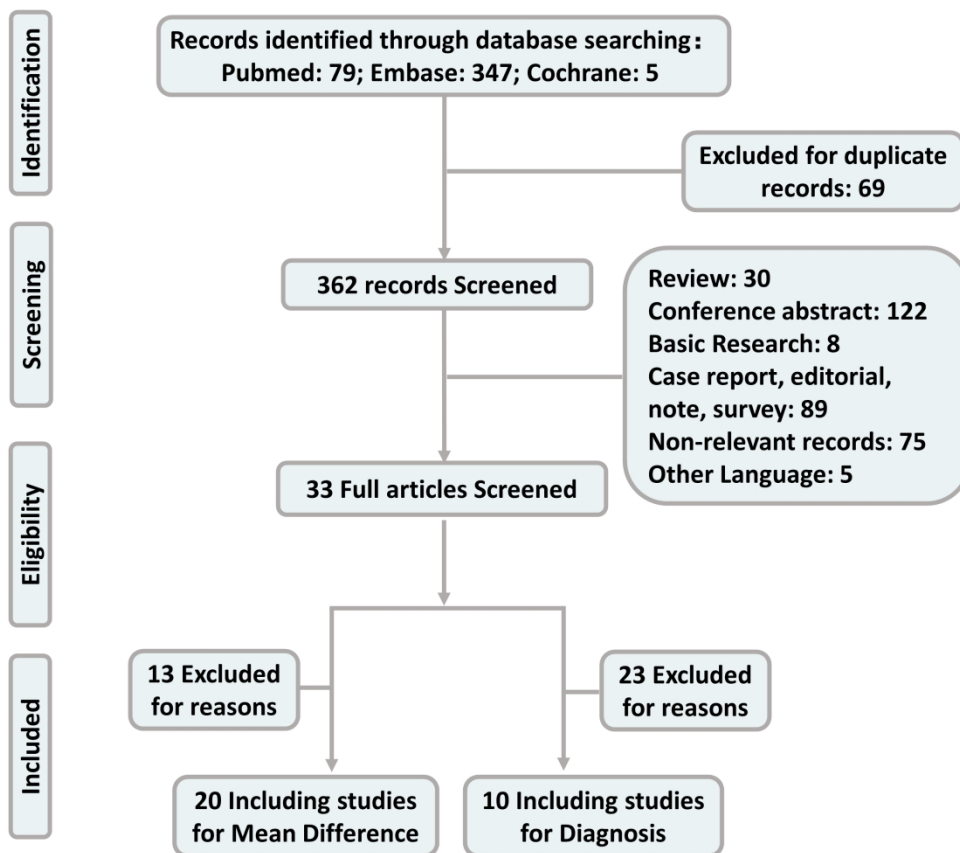

Figure 1 Publication screening flowchart.

233x216mm (300 x 300 DPI)

1  
2  
3  
4  
5  
6  
7  
8  
9  
10  
11  
12  
13  
14  
15  
16  
17  
18  
19  
20  
21  
22  
23  
24  
25  
26  
27  
28  
29  
30  
31  
32  
33  
34  
35  
36  
37  
38  
39  
40  
41  
42  
43  
44  
45  
46  
47  
48  
49  
50  
51  
52  
53  
54  
55  
56  
57  
58  
59  
60

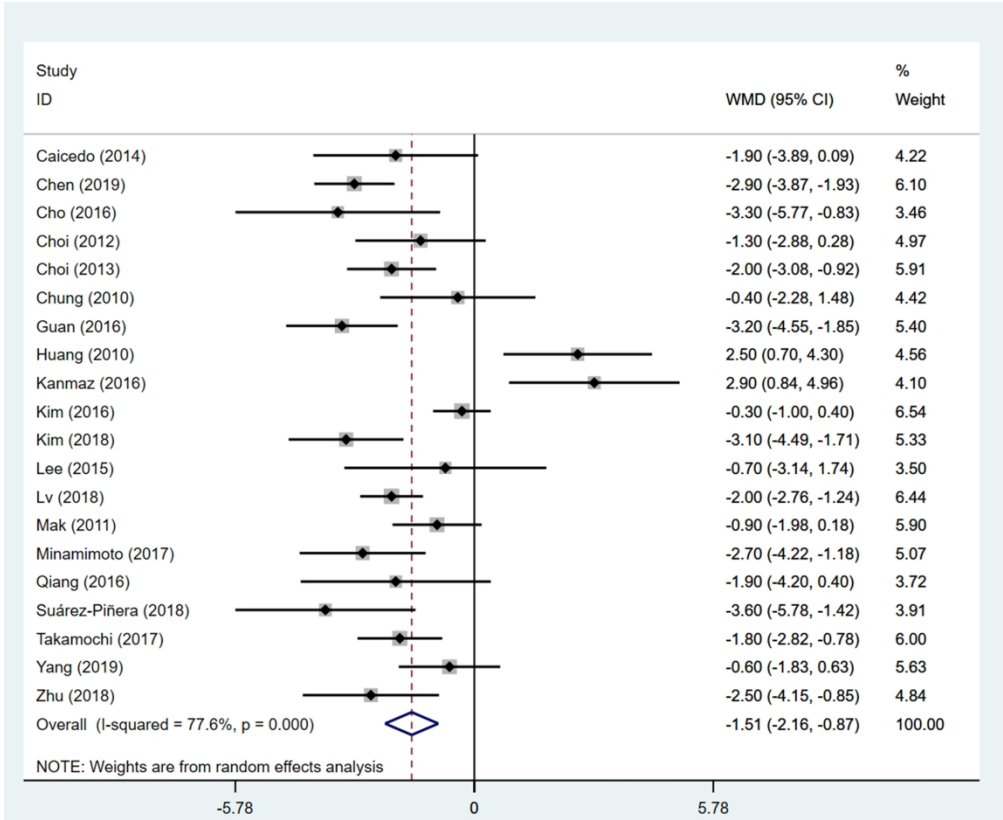

Figure 2 Forest plot for analysis of 18F-FDG uptake in EGFR mutant versus wild-type in NSCLC patients.

221x181mm (300 x 300 DPI)

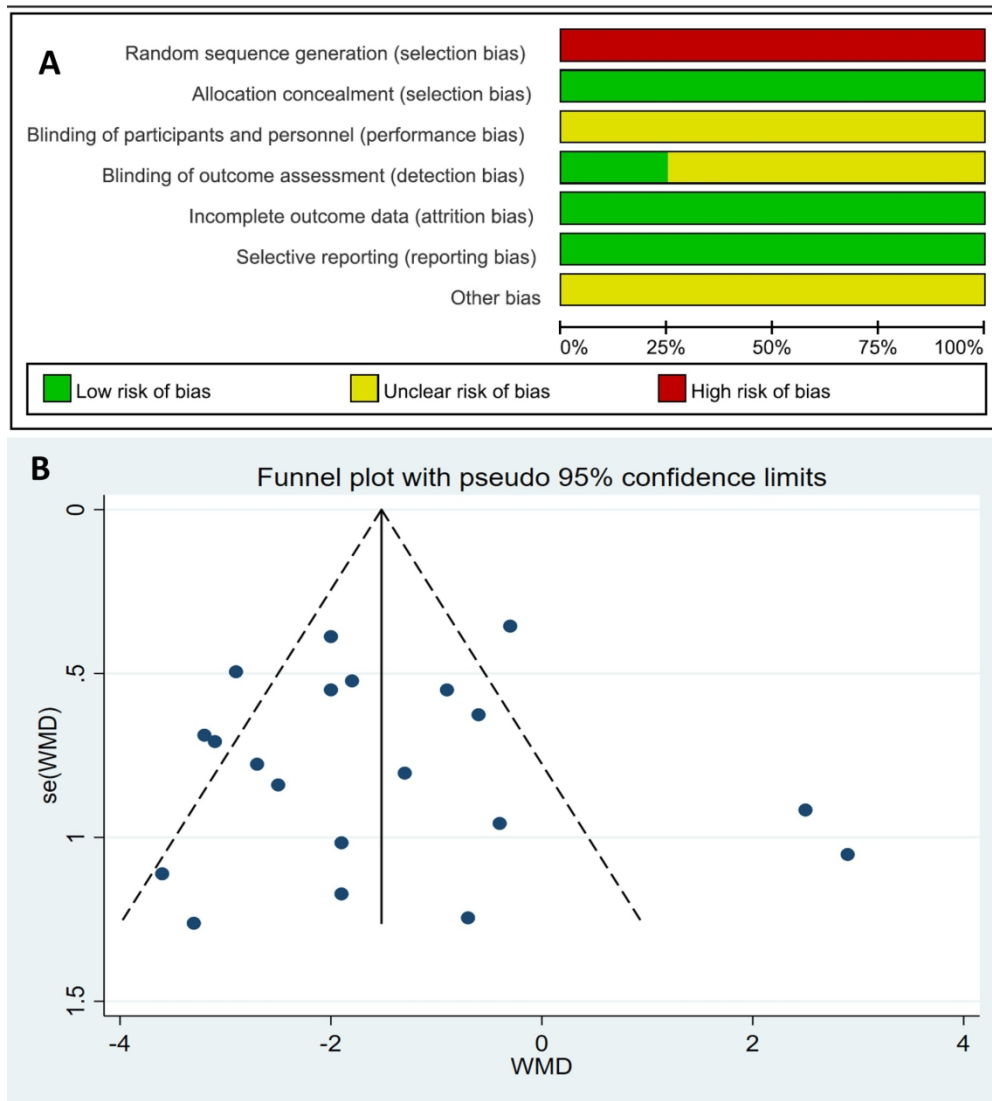

Figure 3 A: Risk of bias of included studies. B: funnel plot of SUVmax in EGFR mutant versus wild-type in NSCLC patients.

171x190mm (300 x 300 DPI)



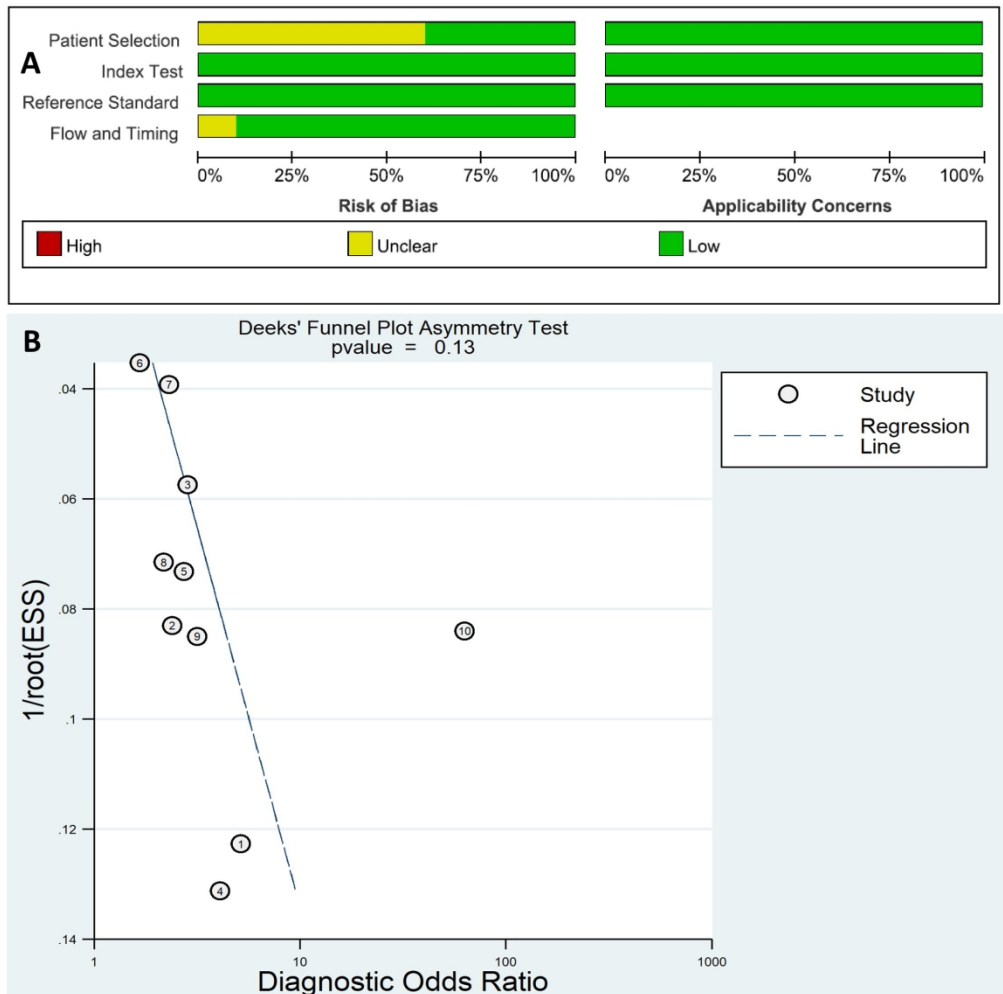

Figure 4 A: Assessment of risk of bias of the included studies using QUADAS-2 tool. B: Deeks's funnel plot of asymmetry test for publication bias showed no significant bias was found. QUADAS-2, Quality Assessment of Diagnostic Accuracy Studies-2; WMD: weighted mean difference; ESS: effective sample size.

187x187mm (300 x 300 DPI)

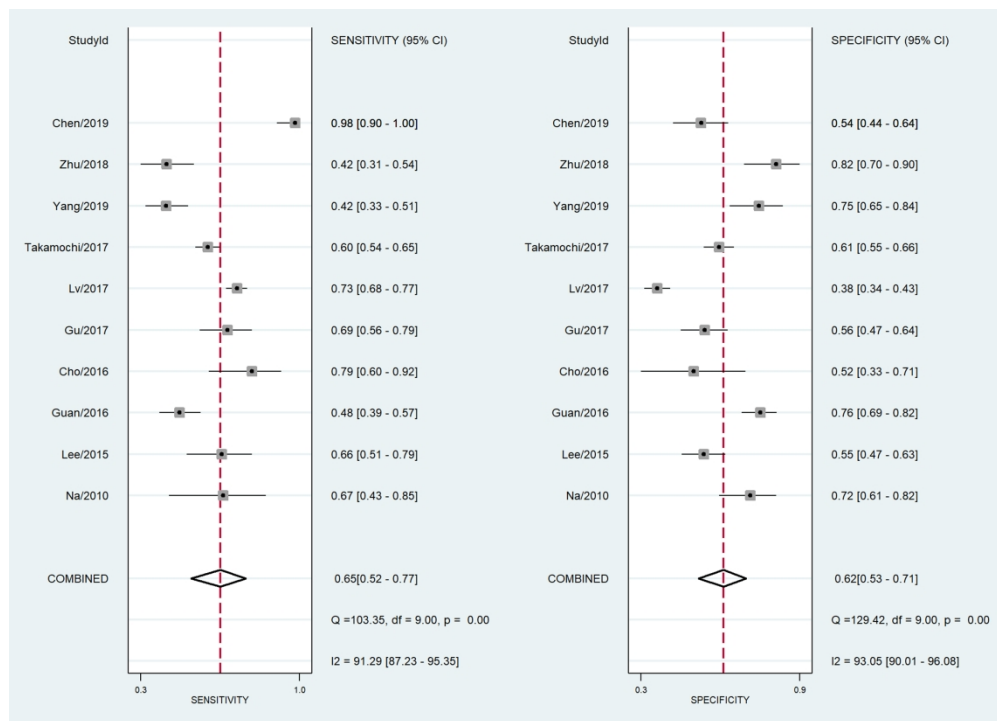

Figure 5 Forest plot of pooled sensitivity and specificity of 18F-FDG PET/CT for predicting EGFR mutations in NSCLC patients.

253x181mm (300 x 300 DPI)

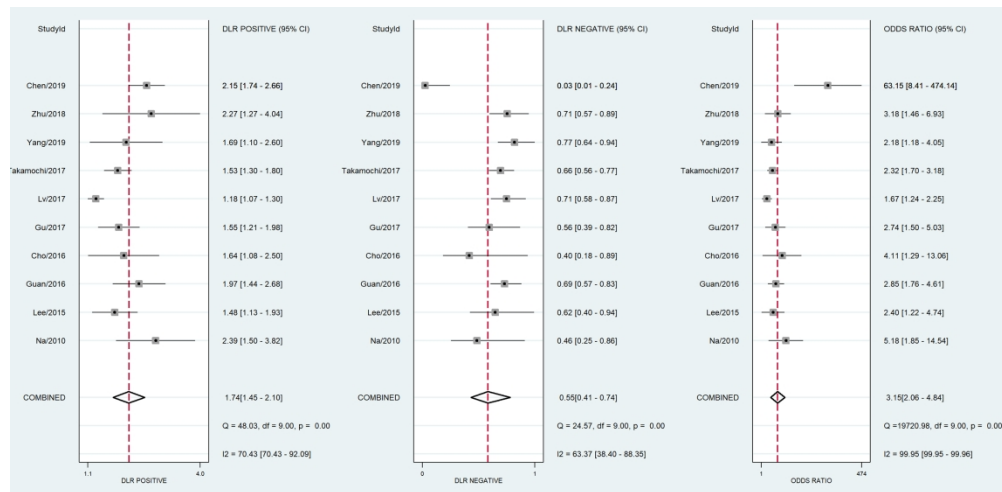

Figure 6 Forest plot of pooled positive, negative DLR and DOR of 18F-FDG PET/CT for predicting EGFR mutations in NSCLC patients.

312x152mm (300 x 300 DPI)

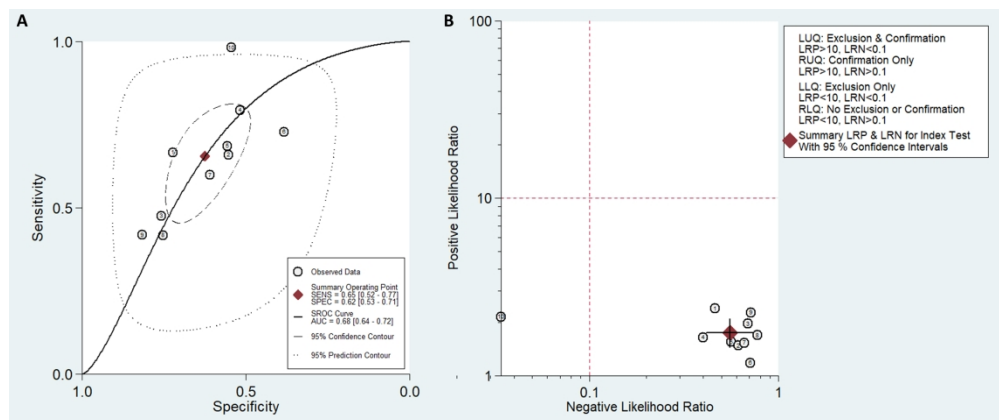

Figure 7 A: Summary receiver operating characteristic (SROC) curves of 18F-FDG PET/CT for predicting EGFR mutations in NSCLC patients. B: Likelihood ratio scatter plot of 18F-FDG PET/CT predicting EGFR mutations in NSCLC patients.

338x140mm (300 x 300 DPI)

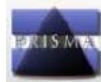

# PRISMA 2009 Checklist

| Section/topic                      | #  | Checklist item                                                                                                                                                                                                                                                                                              | Reported on page # |
|------------------------------------|----|-------------------------------------------------------------------------------------------------------------------------------------------------------------------------------------------------------------------------------------------------------------------------------------------------------------|--------------------|
| <b>TITLE</b>                       |    |                                                                                                                                                                                                                                                                                                             |                    |
| Title                              | 1  | Identify the report as a systematic review, meta-analysis, or both.                                                                                                                                                                                                                                         | Page 1             |
| <b>ABSTRACT</b>                    |    |                                                                                                                                                                                                                                                                                                             |                    |
| Structured summary                 | 2  | Provide a structured summary including, as applicable: background; objectives; data sources; study eligibility criteria, participants, and interventions; study appraisal and synthesis methods; results; limitations; conclusions and implications of key findings; systematic review registration number. | Page 1             |
| <b>INTRODUCTION</b>                |    |                                                                                                                                                                                                                                                                                                             |                    |
| Rationale                          | 3  | Describe the rationale for the review in the context of what is already known.                                                                                                                                                                                                                              | Page 3             |
| Objectives                         | 4  | Provide an explicit statement of questions being addressed with reference to participants, interventions, comparisons, outcomes, and study design (PICOS).                                                                                                                                                  | Page 3             |
| <b>METHODS</b>                     |    |                                                                                                                                                                                                                                                                                                             |                    |
| Protocol and registration          | 5  | Indicate if a review protocol exists, if and where it can be accessed (e.g., Web address), and, if available, provide registration information including registration number.                                                                                                                               | Not applicable     |
| Eligibility criteria               | 6  | Specify study characteristics (e.g., PICOS, length of follow-up) and report characteristics (e.g., years considered, language, publication status) used as criteria for eligibility, giving rationale.                                                                                                      | Page 4             |
| Information sources                | 7  | Describe all information sources (e.g., databases with dates of coverage, contact with study authors to identify additional studies) in the search and date last searched.                                                                                                                                  | Page 4             |
| Search                             | 8  | Present full electronic search strategy for at least one database, including any limits used, such that it could be repeated.                                                                                                                                                                               | Page 4             |
| Study selection                    | 9  | State the process for selecting studies (i.e., screening, eligibility, included in systematic review, and, if applicable, included in the meta-analysis).                                                                                                                                                   | Page 4             |
| Data collection process            | 10 | Describe method of data extraction from reports (e.g., piloted forms, independently, in duplicate) and any processes for obtaining and confirming data from investigators.                                                                                                                                  | Page 4             |
| Data items                         | 11 | List and define all variables for which data were sought (e.g., PICOS, funding sources) and any assumptions and simplifications made.                                                                                                                                                                       | Page 4             |
| Risk of bias in individual studies | 12 | Describe methods used for assessing risk of bias of individual studies (including specification of whether this was done at the study or outcome level), and how this information is to be used in any data synthesis.                                                                                      | Page 4, 5          |
| Summary measures                   | 13 | State the principal summary measures (e.g., risk ratio, difference in means).                                                                                                                                                                                                                               | Page 5             |
| Synthesis of results               | 14 | Describe the methods of handling data and combining results of studies, if done, including measures of consistency (e.g., I <sup>2</sup> ) for each meta-analysis.                                                                                                                                          | Page 5             |

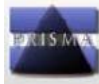

# PRISMA 2009 Checklist

Page 1 of 2

| Section/topic                 | #  | Checklist item                                                                                                                                                                                           | Reported on page #     |
|-------------------------------|----|----------------------------------------------------------------------------------------------------------------------------------------------------------------------------------------------------------|------------------------|
| Risk of bias across studies   | 15 | Specify any assessment of risk of bias that may affect the cumulative evidence (e.g., publication bias, selective reporting within studies).                                                             | Page 4, 5              |
| Additional analyses           | 16 | Describe methods of additional analyses (e.g., sensitivity or subgroup analyses, meta-regression), if done, indicating which were pre-specified.                                                         | Page 5                 |
| <b>RESULTS</b>                |    |                                                                                                                                                                                                          |                        |
| Study selection               | 17 | Give numbers of studies screened, assessed for eligibility, and included in the review, with reasons for exclusions at each stage, ideally with a flow diagram.                                          | Page 5; Figure 1       |
| Study characteristics         | 18 | For each study, present characteristics for which data were extracted (e.g., study size, PICOS, follow-up period) and provide the citations.                                                             | Page 5; Table 1        |
| Risk of bias within studies   | 19 | Present data on risk of bias of each study and, if available, any outcome level assessment (see item 12).                                                                                                | Page 6; Figure 3,4     |
| Results of individual studies | 20 | For all outcomes considered (benefits or harms), present, for each study: (a) simple summary data for each intervention group (b) effect estimates and confidence intervals, ideally with a forest plot. | Page 6; Figure 2       |
| Synthesis of results          | 21 | Present results of each meta-analysis done, including confidence intervals and measures of consistency.                                                                                                  | Page 6; Figure 2, 5, 6 |
| Risk of bias across studies   | 22 | Present results of any assessment of risk of bias across studies (see Item 15).                                                                                                                          | Page 6; Figure 3, 4    |
| Additional analysis           | 23 | Give results of additional analyses, if done (e.g., sensitivity or subgroup analyses, meta-regression [see Item 16]).                                                                                    | Page 6; Figure 7       |
| <b>DISCUSSION</b>             |    |                                                                                                                                                                                                          |                        |
| Summary of evidence           | 24 | Summarize the main findings including the strength of evidence for each main outcome; consider their relevance to key groups (e.g., healthcare providers, users, and policy makers).                     | Page 7,8,9             |
| Limitations                   | 25 | Discuss limitations at study and outcome level (e.g., risk of bias), and at review-level (e.g., incomplete retrieval of identified research, reporting bias).                                            | Page 9                 |
| Conclusions                   | 26 | Provide a general interpretation of the results in the context of other evidence, and implications for future research.                                                                                  | Page 9                 |

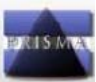

# PRISMA 2009 Checklist

1  
2  
3  
4  
5  
6  
7  
8  
9  
10  
11  
12  
13  
14  
15  
16  
17  
18  
19  
20  
21  
22  
23  
24  
25  
26  
27  
28  
29  
30  
31  
32  
33  
34  
35  
36  
37  
38  
39  
40  
41  
42  
43  
44  
45  
46  
47

|                |    |                                                                                                                                            |         |
|----------------|----|--------------------------------------------------------------------------------------------------------------------------------------------|---------|
| <b>FUNDING</b> |    |                                                                                                                                            |         |
| Funding        | 27 | Describe sources of funding for the systematic review and other support (e.g., supply of data); role of funders for the systematic review. | Page 10 |

From: Moher D, Liberati A, Tetzlaff J, Altman DG, The PRISMA Group (2009). Preferred Reporting Items for Systematic Reviews and Meta-Analyses: The PRISMA Statement. PLoS Med 6(7): e1000097. doi:10.1371/journal.pmed1000097

For more information, visit: [www.prisma-statement.org](http://www.prisma-statement.org).

Page 2 of 2

For peer review only

# BMJ Open

## Can 18F-FDG PET/CT predict EGFR status in non-small cell lung cancer patients? A systematic review and meta-analysis

|                                 |                                                                                                                                                                                                                                                                                                                                                                                                                                                                                |
|---------------------------------|--------------------------------------------------------------------------------------------------------------------------------------------------------------------------------------------------------------------------------------------------------------------------------------------------------------------------------------------------------------------------------------------------------------------------------------------------------------------------------|
| Journal:                        | <i>BMJ Open</i>                                                                                                                                                                                                                                                                                                                                                                                                                                                                |
| Manuscript ID                   | bmjopen-2020-044313.R1                                                                                                                                                                                                                                                                                                                                                                                                                                                         |
| Article Type:                   | Original research                                                                                                                                                                                                                                                                                                                                                                                                                                                              |
| Date Submitted by the Author:   | 24-Feb-2021                                                                                                                                                                                                                                                                                                                                                                                                                                                                    |
| Complete List of Authors:       | Du, Bulin; China Medical University First Hospital, Nuclear Medicine<br>Wang, Shu; China Medical University First Hospital, Nuclear Medicine<br>Cui, Yan; China Medical University First Hospital, Nuclear Medicine<br>Liu, Guanghui; China Medical University First Hospital, Nuclear Medicine<br>Li, Xuena ; China Medical University First Hospital, Department of Nuclear Medicine<br>Li, Yaming ; China Medical University First Hospital, Department of Nuclear Medicine |
| <b>Primary Subject Heading</b>: | Diagnostics                                                                                                                                                                                                                                                                                                                                                                                                                                                                    |
| Secondary Subject Heading:      | Oncology                                                                                                                                                                                                                                                                                                                                                                                                                                                                       |
| Keywords:                       | Nuclear radiology < RADIOLOGY & IMAGING, Respiratory tract tumours < ONCOLOGY, GENETICS                                                                                                                                                                                                                                                                                                                                                                                        |
|                                 |                                                                                                                                                                                                                                                                                                                                                                                                                                                                                |

SCHOLARONE™  
Manuscripts





I, the Submitting Author has the right to grant and does grant on behalf of all authors of the Work (as defined in the below author licence), an exclusive licence and/or a non-exclusive licence for contributions from authors who are: i) UK Crown employees; ii) where BMJ has agreed a CC-BY licence shall apply, and/or iii) in accordance with the terms applicable for US Federal Government officers or employees acting as part of their official duties; on a worldwide, perpetual, irrevocable, royalty-free basis to BMJ Publishing Group Ltd ("BMJ") its licensees and where the relevant Journal is co-owned by BMJ to the co-owners of the Journal, to publish the Work in this journal and any other BMJ products and to exploit all rights, as set out in our [licence](#).

The Submitting Author accepts and understands that any supply made under these terms is made by BMJ to the Submitting Author unless you are acting as an employee on behalf of your employer or a postgraduate student of an affiliated institution which is paying any applicable article publishing charge ("APC") for Open Access articles. Where the Submitting Author wishes to make the Work available on an Open Access basis (and intends to pay the relevant APC), the terms of reuse of such Open Access shall be governed by a Creative Commons licence – details of these licences and which [Creative Commons](#) licence will apply to this Work are set out in our licence referred to above.

Other than as permitted in any relevant BMJ Author's Self Archiving Policies, I confirm this Work has not been accepted for publication elsewhere, is not being considered for publication elsewhere and does not duplicate material already published. I confirm all authors consent to publication of this Work and authorise the granting of this licence.

1  
2  
3 **Can  $^{18}\text{F}$ -FDG PET/CT predict EGFR status in non-small cell lung cancer patients? A**  
4 **systematic review and meta-analysis**  
5  
6

7 Bulin Du, Shu Wang, Yan Cui, Guanghui Liu, Xuena Li, Yaming Li\*

8  
9  
10 Department of Nuclear Medicine, The First Hospital of China Medical University, Shenyang  
11 110001, China.  
12

13  
14 \*Correspondence should be sent to:

15 Yaming Li, Ph.D.

16 Department of Nuclear Medicine

17 The First Hospital of China Medical University

18 No.155, North Nanjing Street, Shenyang, China. Zip code: 110001

19 Email: ymli2001@163.com  
20  
21  
22  
23  
24  
25  
26  
27  
28

29 **Key words**  $^{18}\text{F}$ -fluorodeoxyglucose; positron emission tomography/computed tomography;  
30 epidermal growth factor receptor; non-small cell lung cancer  
31  
32

33  
34 Word count: 5626  
35  
36  
37  
38  
39  
40  
41  
42  
43  
44  
45  
46  
47  
48  
49  
50  
51  
52  
53  
54  
55  
56  
57  
58  
59  
60

## Abstract

**Objectives:** This study aimed to explore the diagnostic significance of  $^{18}\text{F}$ -fluorodeoxyglucose ( $^{18}\text{F}$ -FDG) Positron Emission Tomography/Computed Tomography (PET/CT) for predicting the presence of epidermal growth factor receptor (*EGFR*) mutations in non-small cell lung cancer (NSCLC) patients.

**Design:** A systematic review and meta-analysis.

**Data sources:** The PubMed, EMBASE and Cochrane library databases were searched from the earliest available date to December 2020.

**Eligibility criteria for selecting studies:** The review included primary studies that compared the mean maximum of standard uptake value ( $\text{SUV}_{\text{max}}$ ) between wild-type and mutant *EGFR*, and evaluated the diagnostic value of  $^{18}\text{F}$ -FDG PET/CT using  $\text{SUV}_{\text{max}}$  for prediction of *EGFR* status in NSCLC patients.

**Data extraction and synthesis:** The main analysis was to assess the sensitivity and specificity, the positive diagnostic likelihood ratio (DLR+) and DLR-, as well as the diagnostic odds ratio (DOR) of  $\text{SUV}_{\text{max}}$  in prediction of *EGFR* mutations. Each data point of the summary receiver operator characteristic (SROC) graph was derived from a separate study. A random effects model was used for statistical analysis of the data, and then diagnostic performance for prediction was further assessed.

**Results:** Across 15 studies (3574 patients), the pooled sensitivity for  $^{18}\text{F}$ -FDG PET/CT was 0.70 (95% CI 0.60-0.79) with a pooled specificity of 0.59 (95% CI 0.52-0.66). The overall DLR+ was 1.74 (95% CI 1.49–2.03) and DLR- was 0.50 (95% CI 0.38–0.65). The pooled DOR was 3.50 (95% CI 2.37-5.17). The area under the SROC curve was 0.68 (95% CI 0.64-0.72). The likelihood ratio scatter plot based on average sensitivity and specificity was in the lower right quadrant.

**Conclusion** Meta-analysis results showed  $^{18}\text{F}$ -FDG PET/CT had low pooled sensitivity and specificity. The low DOR and the likelihood ratio scatter plot indicated that  $^{18}\text{F}$ -FDG PET/CT should be used with caution when predicting *EGFR* mutations in NSCLC patients.

## Article summary

### Strengths and limitations

1. To our knowledge, this is the first review that systematically analyzes the diagnostic accuracy of  $^{18}\text{F}$ -FDG PET/CT for predicting *EGFR* status.
2. Weight mean difference analysis was performed prior to inclusion of studies in the diagnostic accuracy meta-analysis.
3. High heterogeneous effect should be mentioned in the results interpretation.

## Introduction

Lung cancer is a common malignant tumor that is associated with considerable social and economic burden. Global statistics show that among malignant tumors, morbidity and mortality from lung cancer ranks first in males, while in females lung cancer is second only to breast cancer [1]. Non-small cell lung cancer (NSCLC) accounts for 85–90% of lung cancers, with lung adenocarcinomas (LUAD) being the most diagnosed histological subtype of NSCLC [2]. In Asia, up to 50% of LUAD patients have activating mutations of the tyrosine kinase domain of epidermal growth factor receptor (*EGFR*) [3]. Tyrosine-kinase inhibitor (TKI), which targets *EGFR* kinase domain mutations, seems to trigger a form of oncogenic shock, resulting in a favorable response in NSCLC [4]. Therefore, it was considered that *EGFR* mutations have a predictive role for TKI administration in NSCLC. The standard approach to detecting *EGFR* status is genetic testing, which is based on tumor specimens captured by resection, fine needle aspiration or biopsy. However, this method does not reflect the status of the entire tumor, and usually results in failure or poor reproducibility due to insufficient materials. Liquid biopsy can identify target mutant gene in circulating cell-free tumor DNA, which is sometimes inconsistencies with specimens biopsy, limiting its clinical application.

Image-based phenotyping, which provides a non-invasive method to visualize tumor phenotypic characteristics, is a promising tool for precision medicine [5]. X-ray computed tomography (CT) imaging have been systematically analyzed to discover anatomical risk factors for *EGFR* mutations prediction in NSCLC [6]. The use of positron emission tomography/computed tomography (PET/CT) as a molecular imaging modality for precision medicine is unique. <sup>18</sup>F-fluorodeoxyglucose (<sup>18</sup>F-FDG) PET/CT that can provide information on glucose metabolism is widely used for cancer diagnosis and image-guided therapy. It has been reported that <sup>18</sup>F-FDG PET/CT can predict *EGFR* status in NSCLC patients, but this remains controversial. Some studies have confirmed that higher uptake of <sup>18</sup>F-FDG is predictive of mutant *EGFR* in NSCLC patients [7–9], while several studies have shown opposite result [10–12]. A systematic review is meaningful to clarify this point.

Although <sup>18</sup>F-FDG PET/CT was used to predict many biological features or other genetic mutations of certain malignancies through meta-analysis [13–15], as far as we know, no meta-analysis has summarized the association between <sup>18</sup>F-FDG PET/CT and *EGFR* mutation status in

1  
2  
3 NSCLC. The purpose of our study was to conduct a meta-analysis of the diagnostic performance  
4 of  $^{18}\text{F}$ -FDG PET/CT in predicting *EGFR* mutations, thereby providing more evidence for precise  
5 treatment of NSCLC patients.  
6  
7

## 8 9 10 **Methods**

### 11 **Patient and public involvement statement**

12  
13  
14 This study was a systematic review and meta-analysis. Ethics committee approval was not  
15 necessary because all data were carefully extracted from existing literature. In addition, neither  
16 patients nor the public were involved in the design and planning of the study.  
17  
18

### 19 **Screening of publications**

20  
21 A systematic review of publications relevant to PET and *EGFR* mutations in NSCLC was  
22 undertaken using the electronic databases of PubMed, Embase and the Cochrane library from the  
23 earliest available date of indexing up to December 31, 2020. A search algorithm based on  
24 combined terms was used: (1) “FDG” OR “Fluorodeoxyglucose” OR “2-Fluoro-2-deoxyglucose”  
25 OR “2-Fluoro-2-deoxy-D-glucose” and (2) “PET” OR “positron emission tomography” and (3)  
26 “Epidermal Growth Factor Receptor” OR “*EGFR*” OR “c-erbB-1” OR “erbB-1” OR “v-erbB”  
27 and (4) “pulmonary cancer” OR “pulmonary cancer” OR “lung neoplasm” OR “lung cancer” and  
28 (5) “mutation” (see online supplementary file for further details on search strategy). In order to  
29 expand the scope of our search, we also screened the references of the included studies for other  
30 studies to include.  
31  
32  
33  
34  
35  
36  
37  
38  
39

### 40 **Inclusion of studies and data extraction**

41  
42  
43 Only original articles focusing on  $^{18}\text{F}$ -FDG PET/CT and *EGFR* status in NSCLC patients were  
44 eligible for inclusion. To compare the differences in  $^{18}\text{F}$ -FDG uptake between *EGFR* mutant and  
45 wild-type patients, the publications that reported the mean maximum of standard uptake value  
46 ( $\text{SUV}_{\text{max}}$ ) and standard deviations (SD) of *EGFR* mutant and wild-type groups were first selected.  
47  
48 Next, articles using  $^{18}\text{F}$ -FDG PET/CT to predict *EGFR* status in NSCLC patients were included  
49 based on whether they provided sufficient data to re-evaluate the sensitivity and specificity, or  
50 provided absolute data including true-positive, true-negative, false-positive and false-negative  
51 without data overlap. Duplicate publications and publications that do not contain original data,  
52  
53  
54  
55  
56  
57  
58  
59  
60

1  
2  
3 such as case reports, conference papers, review articles and letters, were excluded. Non-relevant  
4 studies and basic research were also excluded. Only English article were evaluated. Two  
5 researchers independently reviewed the abstracts of the selected articles using the above  
6 inclusion criteria. When there were disagreements between authors, a consensus was reached  
7 through a third author was consulted. The same researchers independently evaluated the full text  
8 to determine whether they were eligible for final inclusion.  
9  
10  
11  
12

### 13 14 **Quality assessment and publication bias**

15  
16  
17 For pooled weighted mean difference (WMD) analysis, risk of bias, including random sequence  
18 generation, allocation concealment, blinding, incomplete outcome data and selective reporting  
19 were assessed. Publication bias was assessed using a funnel plot, and plot asymmetry was  
20 considered to be suggestive of publication bias. For diagnostic performance analysis, the Quality  
21 Assessment of Diagnostic Accuracy Studies-2 (QUADAS-2) tool was employed to assess the  
22 risk of bias in diagnostic accuracy studies. The tool consisted of four domains of risk of bias,  
23 including patient selection, index test, reference standard and flow and timing. Publication bias  
24 was evaluated using a funnel plot and Egger's regression test.  
25  
26  
27  
28  
29  
30

### 31 **Data synthesis and analysis**

32  
33  
34 A WMD was calculated through  $SUV_{max}$  extracted from the retrieved articles. A random effects  
35 model was used for statistical analysis of the data. Pooled data were displayed using forest plots  
36 and presented with 95% confidence intervals (CI). An  $I^2$  test was performed to analysis the  
37 heterogeneity between studies ( $I^2$  value > 50% was considered significant). Diagnostic  
38 performance for prediction was further assessed. The main purpose was to assess the sensitivity  
39 and specificity, the positive and negative diagnostic likelihood ratios (DLR+ and DLR-,  
40 respectively), as well as the diagnostic odds ratio (DOR). Publication bias was evaluated using a  
41 Deeks' funnel plot of the effective sample size. The bivariate model allowed us to incorporate  
42 the correlation that might exist between the logit-transformed values of paired sensitivity and  
43 specificity across studies. Each data point of the summary receiver operator characteristic  
44 (SROC) graph was derived from a separate study. Based on these points, the smooth SROC  
45 curve was formed to reveal the accuracy of the pooled measures. The likelihood ratio scatter  
46 plots graphically showed summary spots of likelihood ratios obtained from the average  
47  
48  
49  
50  
51  
52  
53  
54  
55  
56  
57  
58  
59  
60

1  
2  
3 sensitivity and specificity. Statistical analyses were performed using STATA 15.1 (StataCorp LP,  
4 College Station, TX) and RevMan 5.3 (Cochrane Collaboration, Copenhagen, Denmark).  $p \leq$   
5 0.05 was considered statistically significant.  
6  
7

## 8 9 **Results**

### 10 **Literature search and selection of studies**

11  
12 The comprehensive search yielded 545 records for analysis. Records with duplicate titles and  
13 abstracts (89) were excluded. Additionally, 36 review articles, 144 conference abstracts, 13 basic  
14 research articles, 120 case reports, editorials, notes and surveys, 86 non-relevant records and 10  
15 other language studies were excluded. The remaining 47 full-text articles were further assessed  
16 for eligibility. For calculating pooled WMD, 24 articles were excluded due to insufficient data  
17 and 23 studies were included. For the pooled DOR analysis, 29 articles were excluded due to  
18 insufficient data and 3 articles were excluded due to inconsistent results according to pooled  
19 WMD results ( $^{18}\text{F}$ -FDG uptake was significantly lower in *EGFR* mutant group; the pooled  
20 sensitivity, specificity and DOR were also calculated without these 3 studies exclusion). The  
21 remaining 15 studies were included in the meta-analysis. The detailed procedure of study  
22 selection is shown in Figure 1.  
23  
24  
25  
26  
27  
28  
29  
30  
31

### 32 **Study description and publication bias**

33  
34 All included patients were taken  $^{18}\text{F}$ -FDG PET/CT examination and *EGFR* gene test. *EGFR*  
35 mutations analysis was carried out on tissue specimens obtained from resection, aspiration or  
36 biopsy. A total of 5220 patients were included in the WMD analysis, and  $\text{SUV}_{\text{max}}$  between the  
37 *EGFR* mutant and wild-type groups were compared. The patients were enrolled retrospectively  
38 in all 23 of the included studies. The pooled comparison of the studies demonstrated that  $^{18}\text{F}$ -  
39 FDG uptake was significantly lower in the *EGFR* mutant group (WMD -1.73; 95% CI -2.34 - -  
40 1.12;  $p < 0.05$ ;  $I^2 = 78.2\%$ , Figure 2). The most common domains with reporting deficiencies  
41 related to the patient selection, as there was no random sequence generation for retrospective  
42 studies (Figure 3A). Visual analysis of the funnel plot was not suggestive of publication bias  
43 using Egger's test ( $p = 0.786$ ; Figure 3B). The principal characteristics of the included 23 studies  
44 are shown in Table 1.  
45  
46  
47  
48  
49  
50  
51  
52  
53

54 In order to predict presence of *EGFR* mutations in NSCLC patients, a total of 3574 patients were  
55 included in the analysis, including 2046 male and 1528 female cases. The average age was 62.9  
56  
57  
58  
59



years old, 90.3% had LUAD and 42.8% were smokers. All 15 studies enrolled patients retrospectively. The incidence rate of *EGFR* mutation was 41.2% with a range of 21.0%–57.5%.  $SUV_{max}$  was used for interpretation of  $^{18}F$ -FDG PET/CT to predict the *EGFR* mutation status. The principal characteristics of the 15 included studies are also shown in Table 1. Most of the observational studies demonstrated a low risk of bias as assessed by the QUADAS-2 tool (Figure 4A). Deek's funnel plot asymmetry tests were performed to assess a possible publication bias. No significant bias was found ( $p = 0.089$ ; Figure 4B).

**Table 1** Characteristics of the included studies

| Authors            | Year | Country | Study design | Patient number | Age (mean) | Gender (M/F) | Smoker | LUAD | Genetic test | <i>EGFR</i> mutant /wild-type | $^{18}F$ -FDG injection dose | Cut-off value | Meta-analysis |
|--------------------|------|---------|--------------|----------------|------------|--------------|--------|------|--------------|-------------------------------|------------------------------|---------------|---------------|
| Caicedo et al [16] | 2014 | Spain   | R            | 102            | 62         | 62/40        | 73     | 90   | PCR          | 22/80                         | NA                           | NA            | WMD           |
| Chen et al [9]     | 2019 | China   | R            | 157            | 66         | 84/73        | 68     | 144  | PCR          | 54/103                        | 481 MBq                      | 9.92          | WMD/ DOR      |
| Cho et al [17]     | 2016 | Korea   | R            | 61             | 61         | 33/28        | 29     | 58   | PCR          | 30/31                         | 5.5 MBq/kg                   | 9.6           | WMD/ DOR      |
| Choi et al [18]    | 2012 | Korea   | R            | 163            | 60         | 99/64        | 73     | 130  | PCR          | 57/106                        | 5.18 MBq/kg                  | NA            | WMD           |
| Choi et al [19]    | 2013 | Korea   | R            | 331            | 62         | 158/173      | 145    | 331  | PCR          | 156/175                       | 5.18 MBq/kg                  | NA            | WMD           |
| Chung et al [20]   | 2010 | Korea   | R            | 106            | 64         | 63/43        | 60     | 97   | PCR          | 42/64                         | 4.8 MBq/kg                   | NA            | WMD           |
| Gao et al [21]     | 2020 | China   | R            | 167            | 58         | 87/80        | 67     | 162  | PCR          | 72/94                         | 370 MBq                      | 11.5          | DOR           |
| Gu et al [22]      | 2017 | China   | R            | 210            | 59         | 132/78       | 90     | 161  | PCR          | 70/140                        | 5.18 MBq/kg                  | 9             | DOR           |
| Guan et al [23]    | 2016 | China   | R            | 316            | 60         | 216/100      | 162    | 242  | PCR          | 126/190                       | NA                           | 8.1           | WMD/ DOR      |
| Hong et al [24]    | 2020 | Korea   | R            | 134            | 69         | 89/45        | 76     | 134  | PCR          | 62/72                         | 52/7MBq/kg                   | 9.6           | WMD/ DOR      |
| Huang et al [10]   | 2010 | China   | R            | 77             | 62         | 44/33        | 16     | 77   | PCR          | 49/28                         | 370MBq                       | NA            | WMD           |
| Kanmaz et al [11]  | 2016 | Turkey  | R            | 218            | 62         | 151/67       | 155    | 218  | PCR          | 63/155                        | 3.7–5.2 MBq/kg               | NA            | WMD           |
| Kim et al [25]     | 2016 | Korea   | R            | 198            | 62         | 113/85       | 68     | 183  | PCR          | 101/97                        | 5.18 MBq/kg                  | NA            | WMD           |
| Kim et al [26]     | 2018 | Korea   | R            | 232            | 64         | 104/128      | 93     | 232  | PCR          | 132/100                       | 5.18 MBq/kg                  | NA            | WMD           |
| Lee et al [27]     | 2015 | Korea   | R            | 206            | 68         | 148/58       | 71     | 135  | PCR          | 47/159                        | 481 MBq                      | 11.7          | DOR           |
| Lee et al [28]     | 2015 | China   | R            | 71             | 65         | 33/38        | 19     | 71   | PCR          | 48/23                         | 370 MBq                      | NA            | WMD           |
| Liao et al [29]    | 2020 | China   | R            | 191            | 63         | 101/90       | 65     | 191  | PCR          | 63/128                        | 3.7 MBq/kg                   | 7.78          | DOR           |
| Lv et al [30]      | 2018 | China   | R            | 808            | 59         | 468/340      | 310    | 731  | PCR          | 371/437                       | 5.5 MBq/kg                   | 7             | WMD/ DOR      |

|                          |      |               |   |     |    |         |     |     |     |         |                 |       |          |
|--------------------------|------|---------------|---|-----|----|---------|-----|-----|-----|---------|-----------------|-------|----------|
| Liu et al [31]           | 2017 | China         | R | 87  | 60 | 49/38   | 32  | 78  | PCR | 41/46   | NA              | 10.4  | DOR      |
| Mak et al[32]            | 2011 | USA           | R | 100 | 65 | 39/61   | 73  | 90  | PCR | 24/76   | 5.55–7.4MBq     | NA    | WMD      |
| Minamoto et al [33]      | 2017 | USA           | R | 127 | 67 | NA      | NA  | 127 | PCR | 32/95   | 12–17 mCi       | NA    | WMD      |
| Mu et al [34]            | 2020 | China,<br>USA | R | 681 | 63 | 378/303 | 315 | 567 | PCR | 312/369 | NA              | NA    | WMD      |
| Na et al [35]            | 2010 | Korea         | R | 100 | 64 | 68/32   | 57  | 53  | PCR | 21/79   | 370 MBq         | 9.2   | DOR      |
| Qiang et al [36]         | 2016 | China         | R | 97  | 65 | 50/47   | 51  | 97  | PCR | 44/53   | 7.4 MBq/kg      | NA    | WMD      |
| Suárez-Piñera et al [37] | 2018 | Spain         | R | 106 | 71 | NA      | NA  | 106 | PCR | 24/82   | 5.29 MBq/kg     | NA    | WMD      |
| Takamochi et al [38]     | 2017 | Japan         | R | 734 | 68 | 367/367 | 363 | 734 | PCR | 334/400 | 3.5 MBq/kg      | 2.69  | WMD/ DOR |
| Whi et al [39]           | 2020 | Korea         | R | 64  | 66 | 34/30   | 25  | 64  | PCR | 29/35   | 5.18 MBq/kg     | 9.5   | WMD/ DOR |
| Yang et al [7]           | 2019 | China         | R | 200 | 61 | 108/92  | 68  | 200 | PCR | 115/85  | 3.7–6.66 MBq/kg | 6.15  | WMD/ DOR |
| Zhu et al [8]            | 2018 | China         | R | 139 | 62 | 62/77   | 46  | 139 | PCR | 74/65   | 4.2 MBq/kg      | 11.19 | WMD/ DOR |

LUAD, Lung adenocarcinoma; WMD, weighted mean difference; DOR, diagnostic odds ratio.

### Diagnostic effectiveness of <sup>18</sup>F-FDG PET/CT

The diagnostic effectiveness of <sup>18</sup>F-FDG PET/CT in predicting *EGFR* mutation in NSCLC patients was meta-analyzed across 15 studies. The pooled sensitivity was 0.70 (95% CI 0.60-0.79) with heterogeneity ( $I^2 = 90.86$ , 95% CI 87.38–94.34,  $p < 0.05$ ). The pooled specificity was 0.59 (95% CI 0.52-0.66) with heterogeneity ( $I^2 = 91.43$ , 95% CI 88.23–94.63,  $p < 0.05$ ; Figure 5). DLR syntheses gave an overall DLR+ of 1.74 (95% CI 1.49–2.03) and DLR– of 0.50 (95% CI 0.38–0.65; Figure 6). The pooled DOR was 3.50 (95% CI 2.37-5.17; Figure 6). The area under curve (AUC) obtained from SROC was 0.68 (95% CI 0.64-0.72; Figure 7A). Lower pooled sensitivity, specificity and DOR were shown with the three studies included in the prediction of *EGFR* mutations in NSCLC patients (see online supplementary file Figure S1).

### Likelihood ratio scatter plot

The summary value of likelihood ratios obtained from the average sensitivity and specificity shown in the likelihood ratio scatter plot (Figure 7B) was located in the lower right quadrant, which indicated that <sup>18</sup>F-FDG PET/CT may not be useful for predicting whether there is an *EGFR* mutation (when positive) or not (when negative).

## Discussion

In light of the advances in the precise treatment of lung cancer, identifying targetable mutations at the time of diagnosis has become the key to determining the best treatment strategies. The *EGFR* mutation is an important molecular subtype of NSCLC, which is highly sensitive to anti-*EGFR* TKI therapy. The clinical outcome of the NSCLC patients harboring *EGFR* alteration was significantly improved by three different generations of *EGFR* TKIs. The identification of the *EGFR* mutation led to an important paradigm shift in the treatment and survival of NSCLC patients. Tissue biopsy is the current gold standard for genetic identification and analysis. Unfortunately, this procedure usually results in failure or poor reproducibility due to insufficient materials. Another emerging strategy is plasma genotyping through “liquid biopsy”, a technique that can identify target mutant gene in circulating cell-free tumor DNA. However, inconsistencies between *EGFR* mutation status obtained from plasma and tumor DNA samples has also been found [40]. Moreover, neither biopsies nor plasma samples can provide accurate anatomical information such as position, size, boundary and relationship with adjacent structures of the tumors, which is critical for clinical treatment planning and response assessment.

Molecular imaging is an attractive option for evaluating NSCLC patients receiving targeted treatment because it can noninvasively observe the molecular and genomic characteristics of the tumor. As a typical molecular imaging technique,  $^{18}\text{F}$ -FDG PET/CT can identify areas of increased metabolic activity by measuring  $^{18}\text{F}$ -FDG uptake in many malignancies including NSCLC. Semi-quantitative parameters can be used for PET image analysis, with  $\text{SUV}_{\text{max}}$  being the most effective and commonly used parameter.  $^{18}\text{F}$ -FDG PET/CT has also been used in the assessment of genetic status.

Previous studies on the value of  $^{18}\text{F}$ -FDG PET in predicting *EGFR* status have been conflicting. Accumulation of  $^{18}\text{F}$ -FDG was reported to be lower in NSCLC patients, which can be used to predict *EGFR* status. Na et al. first reported that patients with low  $\text{SUV}_{\text{max}}$  were more likely to have *EGFR* mutations than those with high  $\text{SUV}_{\text{max}}$ . When using 9.2 as the cut-off value, the specificity and sensitivity reached 72% and 67%, respectively[35]. Lee et al. concluded that  $^{18}\text{F}$ -FDG avidity had no significant clinical value in predicting *EGFR* status, while the univariate analysis showed  $\text{SUV}_{\text{max}}$  was significantly correlated with *EGFR* mutation using 11.7 as the cut-off value [27]. Cho et al. also found that mutant *EGFR* had relatively lower glycolysis compared

with wild-type *EGFR*. A cut-off  $SUV_{max}$  value of 9.6 had the highest sensitivity (79.3 %) in predicting *EGFR* mutation [17]. Research by Guan et al. showed that  $^{18}F$ -FDG uptake values could effectively predict the *EGFR* mutation status of NSCLC patients. ROC curve analysis revealed the AUC was 0.65 with the  $SUV_{max}$  value of 8.1 as the cut-off point [23]. Next, other studies further demonstrated that low  $SUV_{max}$  was a significant predictor of *EGFR* mutations using different cut off values [7, 8, 22, 30, 38]. Chen et al. demonstrated that using 9.92 as the  $SUV_{max}$  cut-off point can best discriminate the *EGFR* mutation status with an AUC of 0.75, and they identified that the mechanism responsible for the decreased FDG uptake associated with mutant *EGFR* was through the NOX4/ROS/GLUT1 axis [9].

However, multiple groups have reported no association between  $SUV_{max}$  and *EGFR* status. Mak et al. reported that high normalized  $SUV_{max}$  only correlated with the *EGFR* wild-type genotype [32]. Moreover, several studies have reported conflicting results. Huang et al. found that a higher  $^{18}F$ -FDG uptake with a  $SUV_{max}$  cut-off value of 9.5 correlates with the presence of *EGFR* mutations [10]. Ko et al. showed a trend of higher  $SUV_{max}$  in patients with an *EGFR* mutation, with an optimal cut-off was 6 [12]. Kanmaz et al. made a similar conclusion, with an  $SUV_{max}$  cut-off value of 13.65 as the predictor [11].

For the conflicting information from the above studies, comparison of mean  $SUV_{max}$  between *EGFR* mutant and wild-type was first pooled with WMD to determine the relationship between *EGFR* status and FDG uptake. According to result of WMD meta-analysis,  $^{18}F$ -FDG uptake was significantly lower in the *EGFR* mutant group. Thus, studies that reported higher  $^{18}F$ -FDG uptake for prediction of *EGFR* mutation in NSCLC patients were excluded in the DOR analysis. The meta-analysis showed low pooled sensitivity of 70% and specificity of 59% for prediction. The low DOR of 0.68 as well as the likelihood ratio scatter plot indicated that  $^{18}F$ -FDG PET/CT might not be useful—or, at least, should be used with caution—for predicting *EGFR* mutations in NSCLC patients. In addition, the obvious heterogeneity, especially for the main parameters, indicated that the differences between studies cannot be ignored and conclusion should be drawn carefully.

To improve diagnostic efficacy, more  $^{18}F$ -FDG PET/CT semi-quantitative parameters including metabolic tumor volume and total glucose glycolysis were investigated to potentially predict *EGFR* mutations [20, 29]. Recent studies also focused on  $^{18}F$ -FDG PET/CT radiomics [41, 42]. Radiomics refers to the extraction of quantitative characteristics from medical images

[43]. The PET/CT-based radiomic characteristics showed good performance in the prediction of *EGFR* mutation in NSCLC patients [34, 44]. Although the prediction efficacy improved, its clinical application requires additional studies to confirm and optimize. Beyond  $^{18}\text{F}$ -FDG, novel radiotracers have also been investigated.  $^{18}\text{F}$ -MPG PET/CT was demonstrated to be a valid strategy for stratifying NSCLC patients with *EGFR*-activating mutations for *EGFR*-TKI treatment [45], but this radiotracer is not routinely available. Other promising studies are under way to translate these novel approaches into the clinic to guide effective precision therapy for NSCLC patients.

The main limitation of this study is the high level of heterogeneity. However, this can be addressed using a random effects model. The first area of heterogeneity is related to NSCLC subtypes. LUAD is the main pathological type of NSCLC, but even within LUAD, there are different subtypes. For example, alveolar carcinoma demonstrates relatively low  $^{18}\text{F}$ -FDG uptake. Second,  $\text{SUV}_{\text{max}}$  is the most stable and commonly used index, but there are many factors that affect  $\text{SUV}_{\text{max}}$ , including tumor size, glucose level, image acquisition and reconstruction, especially for different PET/CT equipment with different acquisition parameters. Third, the number of studies included in this study was small, especially for subgroup analysis. To further study these issues, an increased number of high-quality studies need to be carried out in the future.

## Conclusion

Our meta-analysis results showed that  $^{18}\text{F}$ -FDG PET/CT had low pooled sensitivity and specificity for *EGFR* mutation prediction. The low DOR and the likelihood ratio scatter plot indicated that  $^{18}\text{F}$ -FDG PET/CT might not be useful—or, at least, that it should be used with caution—for predicting *EGFR* mutations in NSCLC patients.

## Author contributions

BD is the first author. BD and YL obtained funding. BD, XL and YL designed the study. BD, YC, GL and SW collected and analyzed the data. BD drafted the manuscript. BD and YL contributed to the interpretation of the results and critical revision of the manuscript for

important intellectual content, and approved the final version of the manuscript. All authors have read and approved the final manuscript. BD and YL are the study guarantors.

### Funding

This work was supported by the National Natural Science Foundation of China (81971652) and Young Scholars Program of China Medical University (QGZ-2018036).

### Competing interests

We have read and understood the BMJ policy on declaration of interests and declare that we have no competing interests.

### Data sharing

No additional data are available

### References

- 1 Ferlay J, Colombet M, Soerjomataram I, et al. Estimating the global cancer incidence and mortality in 2018: GLOBOCAN sources and methods. *Int J Cancer* 2019:1941–53. doi:10.1002/ijc.31937 [published Online First: 6 December 2018].
- 2 Travis WD. Pathology of lung cancer. *Clin Chest Med* 2011;32(4):669–92.
- 3 McLoughlin EM, Gentzler RD. Epidermal Growth Factor Receptor Mutations. *Thorac Surg Clin* 2020;30(2):127–36.
- 4 Sharma SV, Bell DW, Settleman J, et al. Epidermal growth factor receptor mutations in lung cancer. *Nat Rev Cancer* 2007;7(3):169–81.
- 5 Aerts HJWL. The Potential of Radiomic-Based Phenotyping in Precision Medicine: A Review. *JAMA Oncol* 2016;2(12):1636–42.
- 6 Zhang H, Cai W, Wang Y, et al. CT and clinical characteristics that predict risk of EGFR mutation in non-small cell lung cancer: a systematic review and meta-analysis. *Int J Clin Oncol* 2019:649–59. doi:10.1007/s10147-019-01403-3 [published Online First: 5 March 2019].
- 7 Yang B, Wang QG, Lu M, et al. Correlations Study Between 18F-FDG PET/CT Metabolic Parameters Predicting Epidermal Growth Factor Receptor Mutation Status and Prognosis in Lung Adenocarcinoma. *Front Oncol* 2019:589. doi:10.3389/fonc.2019.00589 [published Online First: 18 July 2019].
- 8 Zhu L, Yin G, Chen W, et al. Correlation between EGFR mutation status and F18 - fluorodeoxyglucose positron emission tomography-computed tomography image features in lung adenocarcinoma. *Thorac Cancer* 2019:659–64. doi:10.1111/1759-7714.12981 [published Online First: 18 February 2019].

- 1  
2  
3 9 Chen L, Zhou Y, Tang X, et al. EGFR mutation decreases FDG uptake in non-small cell lung cancer  
4 via the NOX4/ROS/GLUT1 axis. *Int J Oncol* 2019;370–80. doi:10.3892/ijo.2018.4626 [published  
5 Online First: 6 November 2018].  
6  
7 10 Huang C-T, Yen R-F, Cheng M-F, et al. Correlation of F-18 fluorodeoxyglucose-positron emission  
8 tomography maximal standardized uptake value and EGFR mutations in advanced lung  
9 adenocarcinoma. *Med Oncol* 2010;9–15. doi:10.1007/s12032-008-9160-1 [published Online First: 7  
10 January 2009].  
11  
12 11 Kanmaz ZD, Aras G, Tuncay E, et al. Contribution of <sup>18</sup>F-fluorodeoxyglucose positron emission  
13 tomography uptake and TTF-1 expression in the evaluation of the EGFR mutation in patients with  
14 lung adenocarcinoma. *Cancer Biomark* 2016;16(3):489–98.  
15  
16 12 Ko K-H, Hsu H-H, Huang T-W, et al. Value of <sup>18</sup>F-FDG uptake on PET/CT and CEA level to  
17 predict epidermal growth factor receptor mutations in pulmonary adenocarcinoma. *Eur J Nucl Med*  
18 *Mol Imaging* 2014;41(10):1889–97.  
19  
20 13 Machado Medeiros T, Altmayer S, Watte G, et al. 18F-FDG PET/CT and whole-body MRI  
21 diagnostic performance in M staging for non-small cell lung cancer: a systematic review and meta-  
22 analysis. *Eur Radiol* 2020;3641–49. doi:10.1007/s00330-020-06703-1 [published Online First: 3  
23 March 2020].  
24  
25 14 Kim S-J, Pak K, Kim K. Diagnostic performance of F-18 FDG PET/CT for prediction of KRAS  
26 mutation in colorectal cancer patients: a systematic review and meta-analysis. *Abdom Radiol (NY)*  
27 2019;44(5):1703–11.  
28  
29 15 Ayati N, Sadeghi R, Kiamanesh Z, et al. The value of 18F-FDG PET/CT for predicting or  
30 monitoring immunotherapy response in patients with metastatic melanoma: a systematic review and  
31 meta-analysis. *Eur J Nucl Med Mol Imaging* 2020.  
32  
33 16 Caicedo C, Garcia-Velloso MJ, Lozano MD, et al. Role of <sup>18</sup>F-FDG PET in prediction of KRAS and  
34 EGFR mutation status in patients with advanced non-small-cell lung cancer. *Eur J Nucl Med Mol*  
35 *Imaging* 2014;41(11):2058–65.  
36  
37 17 Cho A, Hur J, Moon YW, et al. Correlation between EGFR gene mutation, cytologic tumor markers,  
38 18F-FDG uptake in non-small cell lung cancer. *BMC cancer* 2016;16:224.  
39  
40 18 Choi Y-J, Cho BC, Jeong YH, et al. Correlation between (18)f-fluorodeoxyglucose uptake and  
41 epidermal growth factor receptor mutations in advanced lung cancer. *Nucl Med Mol Imaging*  
42 2012;169–75. doi:10.1007/s13139-012-0142-z [published Online First: 7 June 2012].  
43  
44 19 Choi H, Paeng JC, Kim D-W, et al. Metabolic and metastatic characteristics of ALK-rearranged  
45 lung adenocarcinoma on FDG PET/CT. *Lung Cancer* 2013;242–47.  
46 doi:10.1016/j.lungcan.2012.11.021 [published Online First: 20 December 2012].  
47  
48 20 Chung HW, Lee KY, Kim HJ, et al. FDG PET/CT metabolic tumor volume and total lesion  
49 glycolysis predict prognosis in patients with advanced lung adenocarcinoma. *J Cancer Res Clin*  
50 *Oncol* 2014;89–98. doi:10.1007/s00432-013-1545-7 [published Online First: 6 November 2013].  
51  
52 21 Gao X-C, Wei C-H, Zhang R-G, et al. 18F-FDG PET/CT SUVmax and serum CEA levels as  
53 predictors for EGFR mutation state in Chinese patients with non-small cell lung cancer. *Oncol Lett*  
54 2020;61. doi:10.3892/ol.2020.11922 [published Online First: 29 July 2020].  
55  
56 22 Gu J, Xu S, Huang L, et al. Value of combining serum carcinoembryonic antigen and PET/CT in  
57 predicting EGFR mutation in non-small cell lung cancer. *J Thorac Dis* 2018;10(2):723–31.  
58  
59 23 Guan J, Xiao NJ, Chen M, et al. 18F-FDG uptake for prediction EGFR mutation status in non-small  
60 cell lung cancer. *Medicine (Baltimore)* 2016;95(30):e4421.

- 1  
2  
3 24 Hong IK, Lee JM, Hwang IK, et al. Diagnostic and Predictive Values of 18F-FDG PET/CT  
4 Metabolic Parameters in EGFR-Mutated Advanced Lung Adenocarcinoma. *Cancer Manag Res*  
5 2020;6453–65. doi:10.2147/CMAR.S259055 [published Online First: 28 July 2020].  
6  
7 25 Kim TJ, Lee C-T, Jheon SH, et al. Radiologic Characteristics of Surgically Resected Non-Small  
8 Cell Lung Cancer With ALK Rearrangement or EGFR Mutations. *The Annals of Thoracic Surgery*  
9 2016;101(2):473–80.  
10  
11 26 Kim Y-I, Paeng JC, Park YS, et al. Relation of EGFR Mutation Status to Metabolic Activity in  
12 Localized Lung Adenocarcinoma and Its Influence on the Use of FDG PET/CT Parameters in  
13 Prognosis. *AJR Am J Roentgenol* 2018;1346–51. doi:10.2214/AJR.17.18916 [published Online First:  
14 16 March 2018].  
15  
16 27 Lee SM, Bae SK, Jung SJ, et al. FDG uptake in non-small cell lung cancer is not an independent  
17 predictor of EGFR or KRAS mutation status: a retrospective analysis of 206 patients. *Clin Nucl*  
18 *Med* 2015;40(12):950–58.  
19  
20 28 Lee EYP, Khong P-L, Lee VHF, et al. Metabolic phenotype of stage IV lung adenocarcinoma:  
21 relationship with epidermal growth factor receptor mutation. *Clin Nucl Med* 2015;40(3):e190-5.  
22  
23 29 Liao X, Cui Y, Chen X, et al. Primary metabolic tumor volume from 18F-FDG PET/CT associated  
24 with epidermal growth factor receptor mutation in lung adenocarcinoma patients. *Nucl Med*  
25 *Commun* 2020;41(11):1210–17.  
26  
27 30 Lv Z, Fan J, Xu J, et al. Value of 18F-FDG PET/CT for predicting EGFR mutations and positive  
28 ALK expression in patients with non-small cell lung cancer: a retrospective analysis of 849 Chinese  
29 patients. *Eur J Nucl Med Mol Imaging* 2018;735–50. doi:10.1007/s00259-017-3885-z [published  
30 Online First: 21 November 2017].  
31  
32 31 Liu A, Han A, Zhu H, et al. The role of metabolic tumor volume (MTV) measured by 18F FDG  
33 PET/CT in predicting EGFR gene mutation status in non-small cell lung cancer. *Oncotarget*  
34 2017;8(20):33736–44.  
35  
36 32 Mak RH, Digumarthy SR, Muzikansky A, et al. Role of 18F-fluorodeoxyglucose positron emission  
37 tomography in predicting epidermal growth factor receptor mutations in non-small cell lung cancer.  
38 *Oncologist* 2011;319–26. doi:10.1634/theoncologist.2010-0300 [published Online First: 21  
39 February 2011].  
40  
41 33 Minamimoto R, Jamali M, Gevaert O, et al. Prediction of EGFR and KRAS mutation in non-small  
42 cell lung cancer using quantitative 18F FDG-PET/CT metrics. *Oncotarget* 2017;52792–801.  
43 doi:10.18632/oncotarget.17782 [published Online First: 10 May 2017].  
44  
45 34 Mu W, Jiang L, Zhang J, et al. Non-invasive decision support for NSCLC treatment using PET/CT  
46 radiomics. *Nat Commun* 2020;5228. doi:10.1038/s41467-020-19116-x [published Online First: 16  
47 October 2020].  
48  
49 35 Im Na I, Byun BH, Kim KM, et al. 18F-FDG uptake and EGFR mutations in patients with non-  
50 small cell lung cancer: a single-institution retrospective analysis. *Lung Cancer* 2010;67(1):76–80.  
51  
52 36 Qiang G, Huang W, Liang C, et al. Association between histopathological subtype, 18F-  
53 fluorodeoxyglucose uptake and epidermal growth factor receptor mutations in lung adenocarcinoma.  
54 *Oncol Lett* 2016;1769–77. doi:10.3892/ol.2016.4154 [published Online First: 27 January 2016].  
55  
56 37 Suárez-Piñera M, Belda-Sanchis J, Taus A, et al. FDG PET-CT SUVmax and IASLC/ATS/ERS  
57 histologic classification: a new profile of lung adenocarcinoma with prognostic value. *Am J Nucl*  
58 *Med Mol Imaging* 2018:100–09.  
59  
60



- 1  
2  
3 38 Takamochi K, Mogushi K, Kawaji H, et al. Correlation of EGFR or KRAS mutation status with  
4 18F-FDG uptake on PET-CT scan in lung adenocarcinoma. *PLoS ONE* 2017;12(4):e0175622.  
5  
6 39 Whi W, Ha S, Bae S, et al. Relationship of EGFR Mutation to Glucose Metabolic Activity and  
7 Asphericity of Metabolic Tumor Volume in Lung Adenocarcinoma. *Nucl Med Mol Imaging*  
8 2020:175–82. doi:10.1007/s13139-020-00646-7 [published Online First: 14 June 2020].  
9  
10 40 Del Re M, Crucitta S, Gianfilippo G, et al. Understanding the Mechanisms of Resistance in EGFR-  
11 Positive NSCLC: From Tissue to Liquid Biopsy to Guide Treatment Strategy. *Int J Mol Sci* 2019.  
12 doi:10.3390/ijms20163951 [published Online First: 14 August 2019].  
13  
14 41 Li X, Yin G, Zhang Y, et al. Predictive Power of a Radiomic Signature Based on 18F-FDG PET/CT  
15 Images for EGFR Mutational Status in NSCLC. *Front Oncol* 2019:1062.  
16 doi:10.3389/fonc.2019.01062 [published Online First: 15 October 2019].  
17  
18 42 Nair JKR, Saeed UA, McDougall CC, et al. Radiogenomic Models Using Machine Learning  
19 Techniques to Predict EGFR Mutations in Non-Small Cell Lung Cancer. *Can Assoc Radiol J*  
20 2021:109–19. doi:10.1177/0846537119899526 [published Online First: 17 February 2020].  
21  
22 43 Park H, Sholl LM, Hatabu H, et al. Imaging of Precision Therapy for Lung Cancer: Current State of  
23 the Art. *Radiology* 2019:15–29. doi:10.1148/radiol.2019190173 [published Online First: 6 August  
24 2019].  
25  
26 44 Zhang J, Zhao X, Zhao Y, et al. Value of pre-therapy 18F-FDG PET/CT radiomics in predicting  
27 EGFR mutation status in patients with non-small cell lung cancer. *Eur J Nucl Med Mol Imaging*  
28 2020:1137–46. doi:10.1007/s00259-019-04592-1 [published Online First: 14 November 2019].  
29  
30 45 Sun X, Xiao Z, Chen G, et al. A PET imaging approach for determining EGFR mutation status for  
31 improved lung cancer patient management. *Sci Transl Med* 2018;10(431).  
32  
33  
34  
35  
36  
37  
38  
39  
40  
41  
42  
43  
44  
45  
46  
47  
48  
49  
50  
51  
52  
53  
54  
55  
56  
57  
58  
59  
60

1  
2  
3  
4  
5 **Figure 1** Publication screening flowchart.  
6

7  
8 **Figure 2** Forest plot for analysis of  $^{18}\text{F}$ -FDG uptake in *EGFR* mutant versus wild-type in  
9 NSCLC patients.  
10

11  
12 **Figure 3 A:** Risk of bias of included studies. **B:** funnel plot of  $\text{SUV}_{\text{max}}$  in *EGFR* mutant versus  
13 wild-type in NSCLC patients.  
14  
15

16 **Figure 4 A:** Assessment of risk of bias of the included studies using QUADAS-2 tool. **B:**  
17 Deeks's funnel plot of asymmetry test for publication bias showed no significant bias was found.  
18 QUADAS-2, Quality Assessment of Diagnostic Accuracy Studies-2; WMD: weighted mean  
19 difference; ESS: effective sample size.  
20  
21  
22

23  
24 **Figure 5** Forest plot of pooled sensitivity and specificity of  $^{18}\text{F}$ -FDG PET/CT for predicting  
25 *EGFR* mutations in NSCLC patients.  
26  
27

28 **Figure 6** Forest plot of pooled positive, negative DLR and DOR of  $^{18}\text{F}$ -FDG PET/CT for  
29 predicting *EGFR* mutations in NSCLC patients.  
30  
31

32  
33 **Figure 7 A:** Summary receiver operating characteristic (SROC) curves of  $^{18}\text{F}$ -FDG PET/CT for  
34 predicting *EGFR* mutations in NSCLC patients. **B:** Likelihood ratio scatter plot of  $^{18}\text{F}$ -FDG  
35 PET/CT predicting *EGFR* mutations in NSCLC patients.  
36  
37  
38  
39  
40  
41  
42  
43  
44  
45  
46  
47  
48  
49  
50  
51  
52  
53  
54  
55  
56  
57  
58  
59  
60

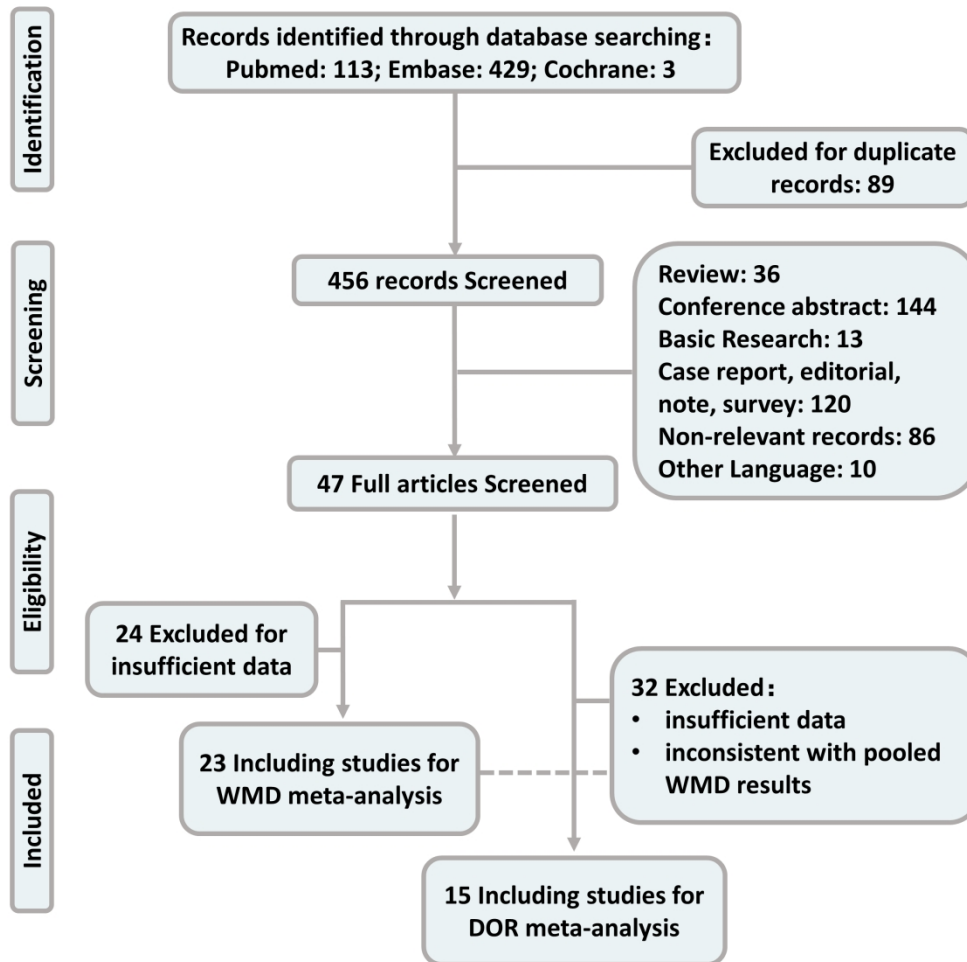

Figure 1 Publication screening flowchart.

234x230mm (300 x 300 DPI)

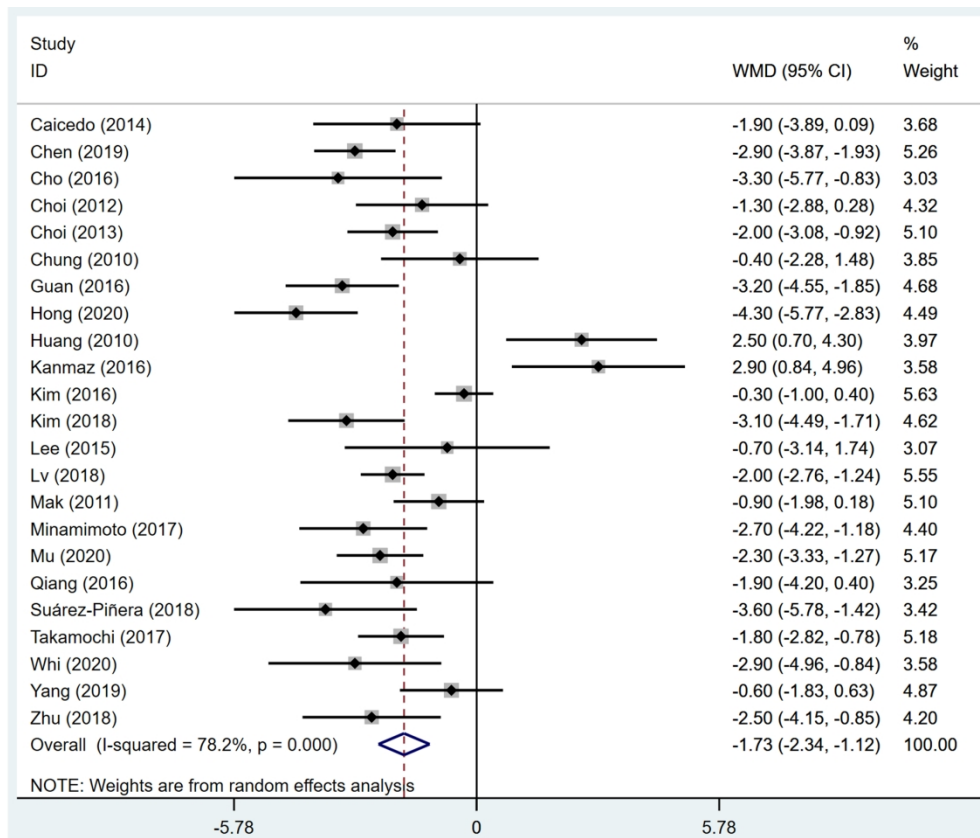

Figure 2 Forest plot for analysis of 18F-FDG uptake in EGFR mutant versus wild-type in NSCLC patients.

228x190mm (300 x 300 DPI)

1  
2  
3  
4  
5  
6  
7  
8  
9  
10  
11  
12  
13  
14  
15  
16  
17  
18  
19  
20  
21  
22  
23  
24  
25  
26  
27  
28  
29  
30  
31  
32  
33  
34  
35  
36  
37  
38  
39  
40  
41  
42  
43  
44  
45  
46  
47  
48  
49  
50  
51  
52  
53  
54  
55  
56  
57  
58  
59  
60

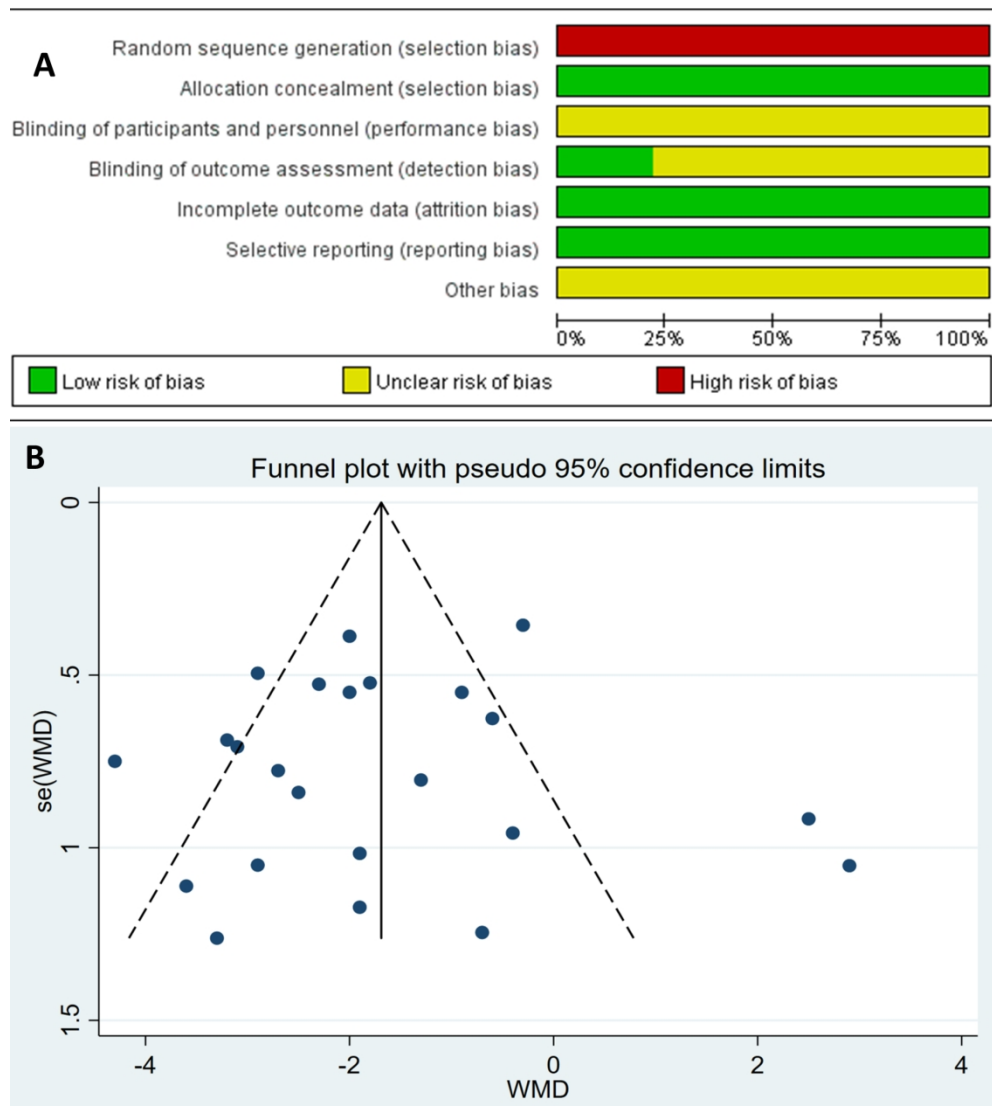

Figure 3 A: Risk of bias of included studies. B: funnel plot of SUVmax in EGFR mutant versus wild-type in NSCLC patients.

170x190mm (300 x 300 DPI)

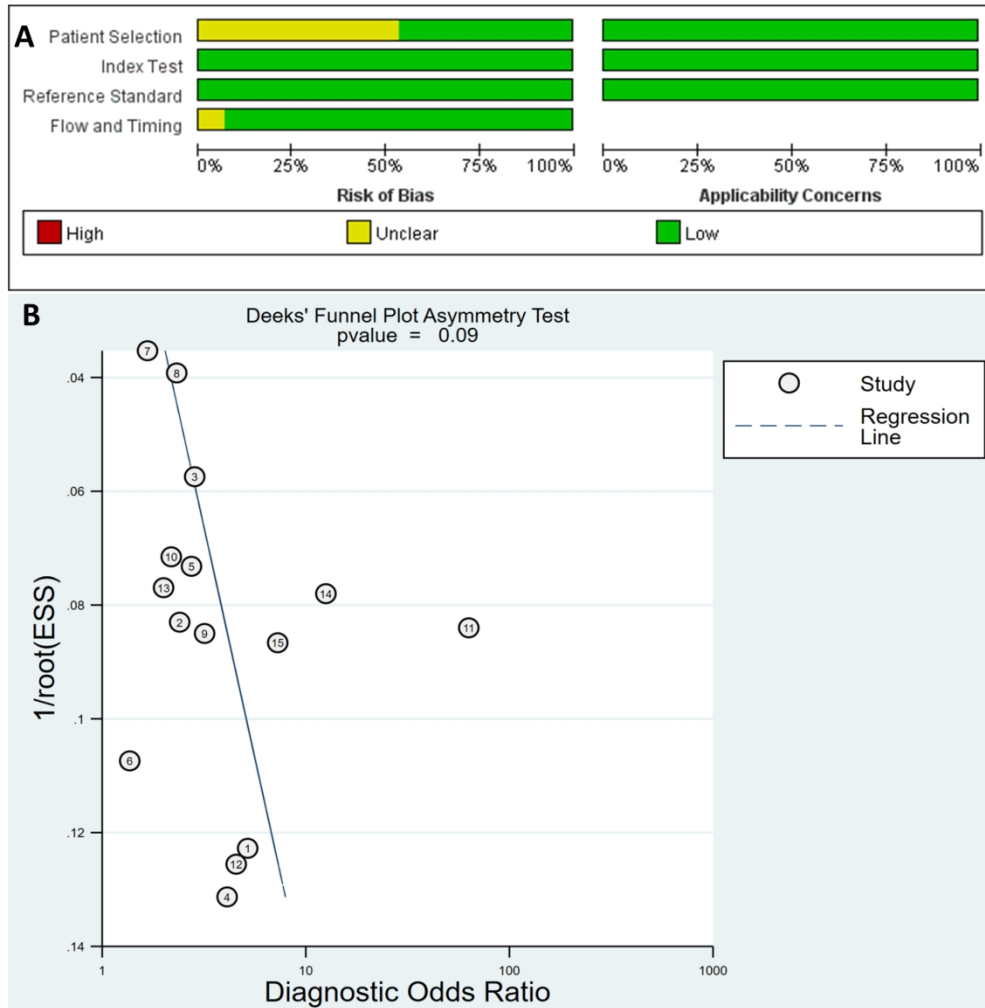

Figure 4 A: Assessment of risk of bias of the included studies using QUADAS-2 tool. B: Deeks's funnel plot of asymmetry test for publication bias showed no significant bias was found. QUADAS-2, Quality Assessment of Diagnostic Accuracy Studies-2; WMD: weighted mean difference; ESS: effective sample size.

187x190mm (300 x 300 DPI)

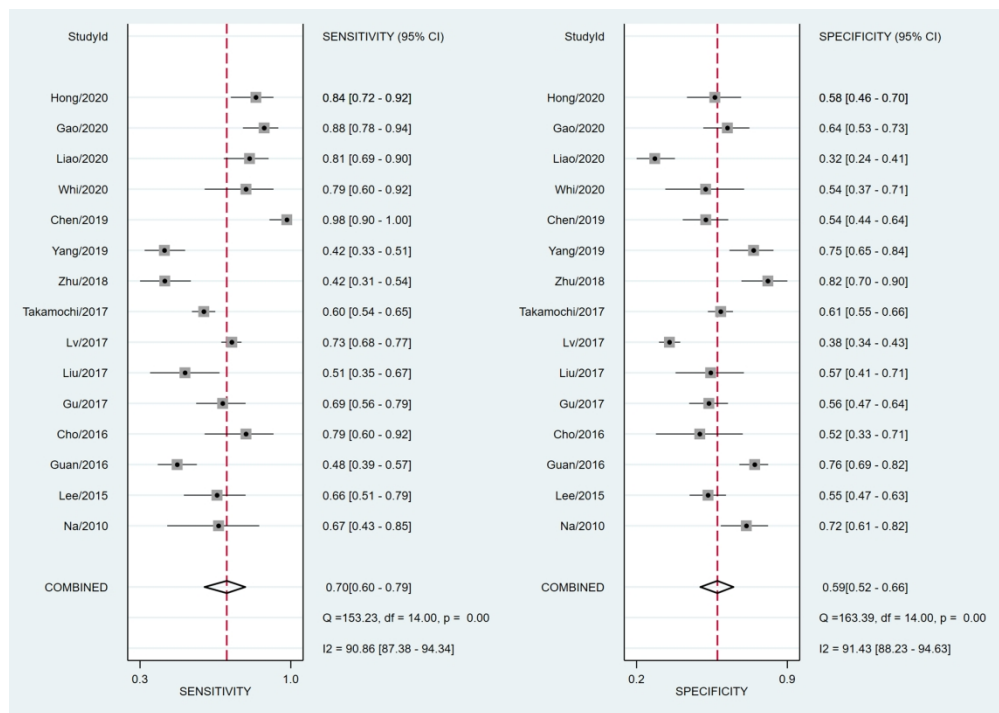

Figure 5 Forest plot of pooled sensitivity and specificity of 18F-FDG PET/CT for predicting EGFR mutations in NSCLC patients.

268x190mm (300 x 300 DPI)

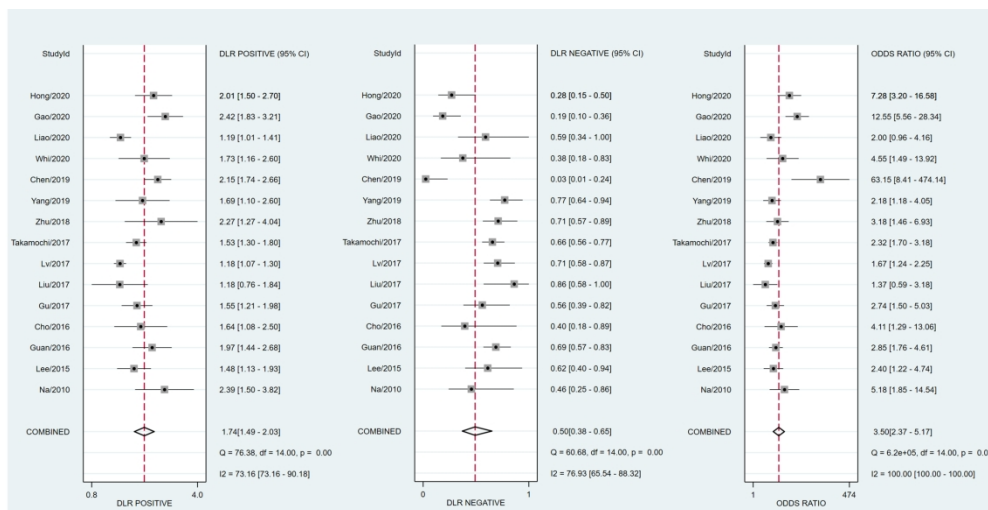

Figure 6 Forest plot of pooled positive, negative DLR and DOR of 18F-FDG PET/CT for predicting EGFR mutations in NSCLC patients.

338x171mm (300 x 300 DPI)



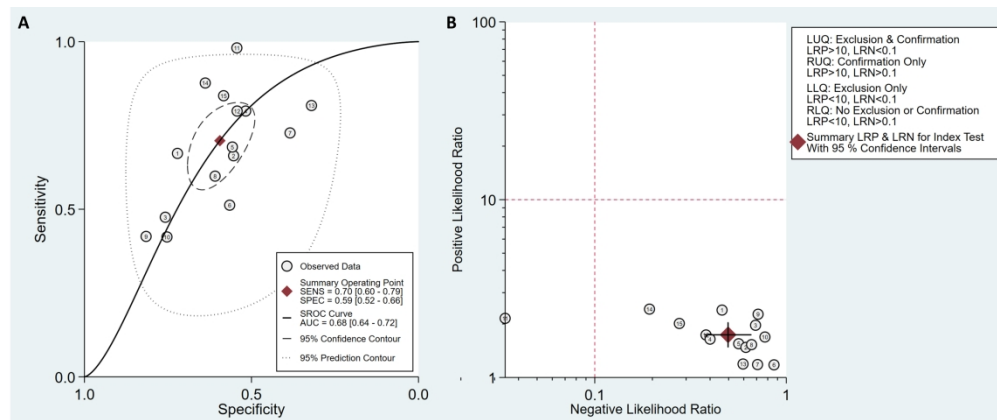

Figure 7 A: Summary receiver operating characteristic (SROC) curves of 18F-FDG PET/CT for predicting EGFR mutations in NSCLC patients. B: Likelihood ratio scatter plot of 18F-FDG PET/CT predicting EGFR mutations in NSCLC patients.

332x137mm (300 x 300 DPI)

Supplementary Appendix

1. Search Strategy (used in PubMed)

(((((((((Epidermal Growth Factor Receptor) OR EGFR)) OR c-erbB-1) OR erbB-1) OR v-erbB)) AND ((((((FDG) OR Fluorodeoxyglucose) OR 2-Fluoro-2-deoxyglucose) OR 2-Fluoro-2-deoxy-D-glucose)) AND ((Positron Emission Tomography) OR PET)) AND (((pulmonary Neoplasm) OR pulmonary cancer)) OR ((lung neoplasm) OR lung cancer)))) AND Mutation

2. Figure S1 Forest plot of pooled sensitivity, specificity and DOR of <sup>18</sup>F-FDG PET/CT for predicting EGFR mutations in NSCLC patients.

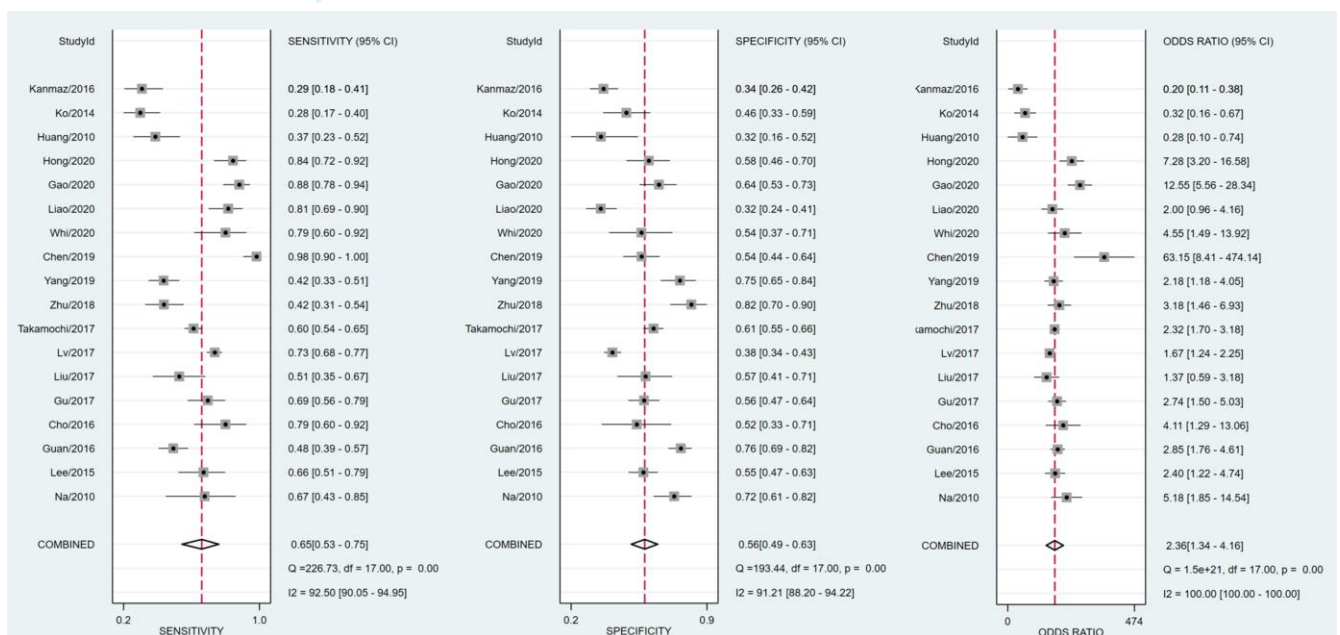



# PRISMA 2009 Checklist

1  
2  
3  
4  
5  
6  
7  
8  
9  
10  
11  
12  
13  
14  
15  
16  
17  
18  
19  
20  
21  
22  
23  
24  
25  
26  
27  
28  
29  
30  
31  
32  
33  
34  
35  
36  
37  
38  
39  
40  
41  
42  
43  
44  
45  
46  
47

| Section/topic                      | #  | Checklist item                                                                                                                                                                                                                                                                                              | Reported on page # |
|------------------------------------|----|-------------------------------------------------------------------------------------------------------------------------------------------------------------------------------------------------------------------------------------------------------------------------------------------------------------|--------------------|
| <b>TITLE</b>                       |    |                                                                                                                                                                                                                                                                                                             |                    |
| Title                              | 1  | Identify the report as a systematic review, meta-analysis, or both.                                                                                                                                                                                                                                         | Page 1             |
| <b>ABSTRACT</b>                    |    |                                                                                                                                                                                                                                                                                                             |                    |
| Structured summary                 | 2  | Provide a structured summary including, as applicable: background; objectives; data sources; study eligibility criteria, participants, and interventions; study appraisal and synthesis methods; results; limitations; conclusions and implications of key findings; systematic review registration number. | Page 1             |
| <b>INTRODUCTION</b>                |    |                                                                                                                                                                                                                                                                                                             |                    |
| Rationale                          | 3  | Describe the rationale for the review in the context of what is already known.                                                                                                                                                                                                                              | Page 4             |
| Objectives                         | 4  | Provide an explicit statement of questions being addressed with reference to participants, interventions, comparisons, outcomes, and study design (PICOS).                                                                                                                                                  | Page 5             |
| <b>METHODS</b>                     |    |                                                                                                                                                                                                                                                                                                             |                    |
| Protocol and registration          | 5  | Indicate if a review protocol exists, if and where it can be accessed (e.g., Web address), and, if available, provide registration information including registration number.                                                                                                                               | Not applicable     |
| Eligibility criteria               | 6  | Specify study characteristics (e.g., PICOS, length of follow-up) and report characteristics (e.g., years considered, language, publication status) used as criteria for eligibility, giving rationale.                                                                                                      | Page 5             |
| Information sources                | 7  | Describe all information sources (e.g., databases with dates of coverage, contact with study authors to identify additional studies) in the search and date last searched.                                                                                                                                  | Page 5             |
| Search                             | 8  | Present full electronic search strategy for at least one database, including any limits used, such that it could be repeated.                                                                                                                                                                               | Page 5             |
| Study selection                    | 9  | State the process for selecting studies (i.e., screening, eligibility, included in systematic review, and, if applicable, included in the meta-analysis).                                                                                                                                                   | Page 5             |
| Data collection process            | 10 | Describe method of data extraction from reports (e.g., piloted forms, independently, in duplicate) and any processes for obtaining and confirming data from investigators.                                                                                                                                  | Page 5             |
| Data items                         | 11 | List and define all variables for which data were sought (e.g., PICOS, funding sources) and any assumptions and simplifications made.                                                                                                                                                                       | Page 5             |
| Risk of bias in individual studies | 12 | Describe methods used for assessing risk of bias of individual studies (including specification of whether this was done at the study or outcome level), and how this information is to be used in any data synthesis.                                                                                      | Page 5, 6          |
| Summary measures                   | 13 | State the principal summary measures (e.g., risk ratio, difference in means).                                                                                                                                                                                                                               | Page 6             |
| Synthesis of results               | 14 | Describe the methods of handling data and combining results of studies, if done, including measures of consistency (e.g., $I^2$ ) for each meta-analysis. <a href="http://bmjopen.bmj.com/site/about/guidelines.xhtml">http://bmjopen.bmj.com/site/about/guidelines.xhtml</a>                               | Page 6             |

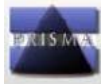

# PRISMA 2009 Checklist

Page 1 of 2

| Section/topic                 | #  | Checklist item                                                                                                                                                                                           | Reported on page #           |
|-------------------------------|----|----------------------------------------------------------------------------------------------------------------------------------------------------------------------------------------------------------|------------------------------|
| Risk of bias across studies   | 15 | Specify any assessment of risk of bias that may affect the cumulative evidence (e.g., publication bias, selective reporting within studies).                                                             | Page 5, 6                    |
| Additional analyses           | 16 | Describe methods of additional analyses (e.g., sensitivity or subgroup analyses, meta-regression), if done, indicating which were pre-specified.                                                         | Page 6                       |
| <b>RESULTS</b>                |    |                                                                                                                                                                                                          |                              |
| Study selection               | 17 | Give numbers of studies screened, assessed for eligibility, and included in the review, with reasons for exclusions at each stage, ideally with a flow diagram.                                          | Page 7;<br>Figure 1          |
| Study characteristics         | 18 | For each study, present characteristics for which data were extracted (e.g., study size, PICOS, follow-up period) and provide the citations.                                                             | Page 7;<br>Table 1           |
| Risk of bias within studies   | 19 | Present data on risk of bias of each study and, if available, any outcome level assessment (see item 12).                                                                                                | Page 7;<br>Figure 3,4        |
| Results of individual studies | 20 | For all outcomes considered (benefits or harms), present, for each study: (a) simple summary data for each intervention group (b) effect estimates and confidence intervals, ideally with a forest plot. | Page 8;<br>Figure 2          |
| Synthesis of results          | 21 | Present results of each meta-analysis done, including confidence intervals and measures of consistency.                                                                                                  | Page 9;<br>Figure 2,<br>5, 6 |
| Risk of bias across studies   | 22 | Present results of any assessment of risk of bias across studies (see Item 15).                                                                                                                          | Page 7;<br>Figure 3,<br>4    |
| Additional analysis           | 23 | Give results of additional analyses, if done (e.g., sensitivity or subgroup analyses, meta-regression [see Item 16]).                                                                                    | Page 9;<br>Figure 7          |
| <b>DISCUSSION</b>             |    |                                                                                                                                                                                                          |                              |
| Summary of evidence           | 24 | Summarize the main findings including the strength of evidence for each main outcome; consider their relevance to key groups (e.g., healthcare providers, users, and policy makers).                     | Page 10,11,12                |
| Limitations                   | 25 | Discuss limitations at study and outcome level (e.g., risk of bias), and at review-level (e.g., incomplete retrieval of identified research, reporting bias).                                            | Page 12                      |
| Conclusions                   | 26 | Provide a general interpretation of the results in the context of other evidence, and implications for future research.                                                                                  | Page 12                      |



# PRISMA 2009 Checklist

1  
2  
3  
4  
5  
6  
7  
8  
9  
10  
11  
12  
13  
14  
15  
16  
17  
18  
19  
20  
21  
22  
23  
24  
25  
26  
27  
28  
29  
30  
31  
32  
33  
34  
35  
36  
37  
38  
39  
40  
41  
42  
43  
44  
45  
46  
47

|                |    |                                                                                                                                            |         |
|----------------|----|--------------------------------------------------------------------------------------------------------------------------------------------|---------|
| <b>FUNDING</b> |    |                                                                                                                                            |         |
| Funding        | 27 | Describe sources of funding for the systematic review and other support (e.g., supply of data); role of funders for the systematic review. | Page 13 |

*From:* Moher D, Liberati A, Tetzlaff J, Altman DG, The PRISMA Group (2009). Preferred Reporting Items for Systematic Reviews and Meta-Analyses: The PRISMA Statement. PLoS Med 6(7): e1000097. doi:10.1371/journal.pmed1000097

For more information, visit: [www.prisma-statement.org](http://www.prisma-statement.org).

Page 2 of 2

For peer review only

# BMJ Open

## Can 18F-FDG PET/CT predict EGFR status in non-small cell lung cancer patients? A systematic review and meta-analysis

|                                 |                                                                                                                                                                                                                                                                                                                                                                                                                                                                                |
|---------------------------------|--------------------------------------------------------------------------------------------------------------------------------------------------------------------------------------------------------------------------------------------------------------------------------------------------------------------------------------------------------------------------------------------------------------------------------------------------------------------------------|
| Journal:                        | <i>BMJ Open</i>                                                                                                                                                                                                                                                                                                                                                                                                                                                                |
| Manuscript ID                   | bmjopen-2020-044313.R2                                                                                                                                                                                                                                                                                                                                                                                                                                                         |
| Article Type:                   | Original research                                                                                                                                                                                                                                                                                                                                                                                                                                                              |
| Date Submitted by the Author:   | 11-May-2021                                                                                                                                                                                                                                                                                                                                                                                                                                                                    |
| Complete List of Authors:       | Du, Bulin; China Medical University First Hospital, Nuclear Medicine<br>Wang, Shu; China Medical University First Hospital, Nuclear Medicine<br>Cui, Yan; China Medical University First Hospital, Nuclear Medicine<br>Liu, Guanghui; China Medical University First Hospital, Nuclear Medicine<br>Li, Xuena ; China Medical University First Hospital, Department of Nuclear Medicine<br>Li, Yaming ; China Medical University First Hospital, Department of Nuclear Medicine |
| <b>Primary Subject Heading</b>: | Diagnostics                                                                                                                                                                                                                                                                                                                                                                                                                                                                    |
| Secondary Subject Heading:      | Oncology                                                                                                                                                                                                                                                                                                                                                                                                                                                                       |
| Keywords:                       | Nuclear radiology < RADIOLOGY & IMAGING, Respiratory tract tumours < ONCOLOGY, GENETICS                                                                                                                                                                                                                                                                                                                                                                                        |
|                                 |                                                                                                                                                                                                                                                                                                                                                                                                                                                                                |

SCHOLARONE™  
Manuscripts



I, the Submitting Author has the right to grant and does grant on behalf of all authors of the Work (as defined in the below author licence), an exclusive licence and/or a non-exclusive licence for contributions from authors who are: i) UK Crown employees; ii) where BMJ has agreed a CC-BY licence shall apply, and/or iii) in accordance with the terms applicable for US Federal Government officers or employees acting as part of their official duties; on a worldwide, perpetual, irrevocable, royalty-free basis to BMJ Publishing Group Ltd ("BMJ") its licensees and where the relevant Journal is co-owned by BMJ to the co-owners of the Journal, to publish the Work in this journal and any other BMJ products and to exploit all rights, as set out in our [licence](#).

The Submitting Author accepts and understands that any supply made under these terms is made by BMJ to the Submitting Author unless you are acting as an employee on behalf of your employer or a postgraduate student of an affiliated institution which is paying any applicable article publishing charge ("APC") for Open Access articles. Where the Submitting Author wishes to make the Work available on an Open Access basis (and intends to pay the relevant APC), the terms of reuse of such Open Access shall be governed by a Creative Commons licence – details of these licences and which [Creative Commons](#) licence will apply to this Work are set out in our licence referred to above.

Other than as permitted in any relevant BMJ Author's Self Archiving Policies, I confirm this Work has not been accepted for publication elsewhere, is not being considered for publication elsewhere and does not duplicate material already published. I confirm all authors consent to publication of this Work and authorise the granting of this licence.

1  
2  
3 **Can  $^{18}\text{F}$ -FDG PET/CT predict EGFR status in non-small cell lung cancer patients? A**  
4 **systematic review and meta-analysis**  
5  
6

7 Bulin Du, Shu Wang, Yan Cui, Guanghui Liu, Xuena Li, Yaming Li\*  
8  
9

10 Department of Nuclear Medicine, The First Hospital of China Medical University, Shenyang  
11 110001, China.  
12  
13

14 \*Correspondence should be sent to:  
15

16 Yaming Li, Ph.D.  
17

18 Department of Nuclear Medicine  
19

20 The First Hospital of China Medical University  
21

22 No.155, North Nanjing Street, Shenyang, China. Zip code: 110001  
23

24 Email: ymli2001@163.com  
25  
26  
27  
28

29 **Key words**  $^{18}\text{F}$ -fluorodeoxyglucose; positron emission tomography/computed tomography;  
30 epidermal growth factor receptor; non-small cell lung cancer  
31  
32  
33

34 Word count: 5527  
35  
36  
37  
38  
39  
40  
41  
42  
43  
44  
45  
46  
47  
48  
49  
50  
51  
52  
53  
54  
55  
56  
57  
58  
59  
60



## Abstract

**Objectives:** This study aimed to explore the diagnostic significance of  $^{18}\text{F}$ -fluorodeoxyglucose ( $^{18}\text{F}$ -FDG) Positron Emission Tomography/Computed Tomography (PET/CT) for predicting the presence of epidermal growth factor receptor (*EGFR*) mutations in non-small cell lung cancer (NSCLC) patients.

**Design:** A systematic review and meta-analysis.

**Data sources:** The PubMed, EMBASE and Cochrane library databases were searched from the earliest available date to December 2020.

**Eligibility criteria for selecting studies:** The review included primary studies that compared the mean maximum of standard uptake value ( $\text{SUV}_{\text{max}}$ ) between wild-type and mutant *EGFR*, and evaluated the diagnostic value of  $^{18}\text{F}$ -FDG PET/CT using  $\text{SUV}_{\text{max}}$  for prediction of *EGFR* status in NSCLC patients.

**Data extraction and synthesis:** The main analysis was to assess the sensitivity and specificity, the positive diagnostic likelihood ratio (DLR+) and DLR-, as well as the diagnostic odds ratio (DOR) of  $\text{SUV}_{\text{max}}$  in prediction of *EGFR* mutations. Each data point of the summary receiver operator characteristic (SROC) graph was derived from a separate study. A random effects model was used for statistical analysis of the data, and then diagnostic performance for prediction was further assessed.

**Results:** Across 15 studies (3574 patients), the pooled sensitivity for  $^{18}\text{F}$ -FDG PET/CT was 0.70 (95% CI 0.60-0.79) with a pooled specificity of 0.59 (95% CI 0.52-0.66). The overall DLR+ was 1.74 (95% CI 1.49–2.03) and DLR- was 0.50 (95% CI 0.38–0.65). The pooled DOR was 3.50 (95% CI 2.37-5.17). The area under the SROC curve was 0.68 (95% CI 0.64-0.72). The likelihood ratio scatter plot based on average sensitivity and specificity was in the lower right quadrant.

**Conclusion** Meta-analysis results showed  $^{18}\text{F}$ -FDG PET/CT had low pooled sensitivity and specificity. The low DOR and the likelihood ratio scatter plot indicated that  $^{18}\text{F}$ -FDG PET/CT should be used with caution when predicting *EGFR* mutations in NSCLC patients.

## Article summary

### Strengths and limitations

1. To our knowledge, this is the first review that systematically analyzes the diagnostic accuracy of  $^{18}\text{F}$ -FDG PET/CT for predicting *EGFR* status.
2. Weight mean difference analysis was performed prior to inclusion of studies in the diagnostic accuracy meta-analysis.
3. High heterogeneous effect should be mentioned in the results interpretation.

## Introduction

Lung cancer is a common malignant tumor that is associated with considerable social and economic burden. Global statistics show that among malignant tumors, morbidity and mortality from lung cancer ranks first in males, while in females lung cancer is second only to breast cancer [1]. Non-small cell lung cancer (NSCLC) accounts for 85–90% of lung cancers, with lung adenocarcinomas (LUAD) being the most diagnosed histological subtype of NSCLC [2]. In Asia, up to 50% of LUAD patients have activating mutations of the tyrosine kinase domain of epidermal growth factor receptor (*EGFR*) [3]. Tyrosine-kinase inhibitor (TKI), which targets *EGFR* kinase domain mutations, seems to trigger a form of oncogenic shock, resulting in a favorable response in NSCLC [4]. The clinical outcome of the NSCLC patients harboring *EGFR* alteration was significantly improved by three different generations of *EGFR* TKIs. Therefore, *EGFR* mutations are considered to have a predictive role in the success of TKI treatment in NSCLC. The standard approach to detecting *EGFR* status is genetic testing, which is based on tumor specimens captured by resection, fine needle aspiration or biopsy. However, this method does not reflect the status of the entire tumor, and usually results in failure or poor reproducibility due to insufficient materials. Liquid biopsy can identify mutant target gene in circulating cell-free tumor DNA, which is sometimes inconsistent with specimens biopsy [5], limiting its clinical application. Moreover, neither biopsies nor plasma samples can provide accurate anatomical information such as position, size, boundary and relationship with adjacent structures of the tumors, which is critical for clinical treatment planning and response assessment.

Image-based phenotyping, which provides a non-invasive method to visualize tumor phenotypic characteristics, is a promising tool for precision medicine [6]. X-ray computed tomography (CT) imaging have been systematically analyzed to discover anatomical risk factors for *EGFR* mutations prediction in NSCLC [7]. Molecular imaging is an attractive option for evaluating NSCLC patients receiving targeted treatment because it can noninvasively capture the molecular and genomic characteristics of the tumor. The use of positron emission tomography/computed tomography (PET/CT) as a molecular imaging modality for precision medicine is unique. <sup>18</sup>F-fluorodeoxyglucose (<sup>18</sup>F-FDG) PET/CT can provide information on glucose metabolism and is widely used for cancer diagnosis and image-guided therapy. Semi-quantitative parameters can be used for PET image analysis, with the mean maximum of standard uptake

value ( $SUV_{max}$ ) being the most effective and commonly used parameter. It has been reported that  $^{18}F$ -FDG PET/CT can predict *EGFR* status in NSCLC patients, but this remains controversial. Some studies have confirmed that higher uptake of  $^{18}F$ -FDG is predictive of mutant *EGFR* in NSCLC patients [8–10], while several other studies have shown the opposite result [11–13]. A systematic review is needed to clarify this point.

Although  $^{18}F$ -FDG PET/CT was used to predict many biological features or other genetic mutations of certain malignancies through meta-analysis [14–16], as far as we know, no meta-analysis has summarized the association between  $^{18}F$ -FDG PET/CT and *EGFR* mutation status in NSCLC. The purpose of our study was to conduct a meta-analysis of the diagnostic performance of  $^{18}F$ -FDG PET/CT in predicting *EGFR* mutations, thereby providing more evidence for precise treatment of NSCLC patients.

## Methods

### Screening of publications

A systematic review of publications relevant to PET and *EGFR* mutations in NSCLC was undertaken using the electronic databases of PubMed, Embase and the Cochrane library from the earliest available date of indexing up to December 31, 2020. A search algorithm based on combined terms was used: (1) “FDG” OR “Fluorodeoxyglucose” OR “2-Fluoro-2-deoxyglucose” OR “2-Fluoro-2-deoxy-D-glucose” and (2) “PET” OR “positron emission tomography” and (3) “Epidermal Growth Factor Receptor” OR “*EGFR*” OR “c-erbB-1” OR “erbB-1” OR “v-erbB” and (4) “pulmonary cancer” OR “lung cancer” OR “lung neoplasm” OR “lung cancer” and (5) “mutation” (see online supplementary file for further details on search strategy). In order to expand the scope of our search, we also screened the references of the included studies for other studies to include.

### Inclusion of studies and data extraction

Only original articles focusing on  $^{18}F$ -FDG PET/CT and *EGFR* status in NSCLC patients were eligible for inclusion. To compare the differences in  $^{18}F$ -FDG uptake between *EGFR* mutant and wild-type patients, the publications that reported  $SUV_{max}$  and standard deviations (SD) of *EGFR* mutant and wild-type groups were first selected. Next, articles using  $^{18}F$ -FDG PET/CT to predict *EGFR* status in NSCLC patients were included based on whether they provided sufficient data to

1  
2  
3 re-evaluate the sensitivity and specificity, or provided absolute data including true-positive, true-  
4 negative, false-positive and false-negative without data overlap. Duplicate publications and  
5 publications that do not contain original data, such as case reports, conference papers, review  
6 articles and letters, were excluded. Non-relevant studies and basic research were also excluded.  
7 Only English article were evaluated. Two researchers independently reviewed the abstracts of  
8 the selected articles using the above inclusion criteria. When there were disagreements between  
9 authors, a consensus was reached through a third author who was consulted. The same  
10 researchers independently evaluated the full text to determine whether they were eligible for  
11 final inclusion.  
12  
13  
14  
15  
16  
17  
18

### 19 **Quality assessment and publication bias**

20  
21  
22 For pooled weighted mean difference (WMD) analysis, risk of bias, including random sequence  
23 generation, allocation concealment, blinding, incomplete outcome data and selective reporting  
24 were assessed. Publication bias was assessed using a funnel plot, and plot asymmetry was  
25 considered to be suggestive of publication bias. For diagnostic performance analysis, the Quality  
26 Assessment of Diagnostic Accuracy Studies-2 (QUADAS-2) tool was employed to assess the  
27 risk of bias in diagnostic accuracy studies. The tool consisted of four domains of risk of bias,  
28 including patient selection, index test, reference standard and flow and timing. Publication bias  
29 was evaluated using a funnel plot and Egger's regression test.  
30  
31  
32  
33  
34  
35  
36

### 37 **Data synthesis and analysis**

38  
39 A WMD was calculated through  $SUV_{max}$  extracted from the retrieved articles. A random effects  
40 model was used for statistical analysis of the data. Pooled data were displayed using forest plots  
41 and presented with 95% confidence intervals (CI). An  $I^2$  test was performed to analysis the  
42 heterogeneity between studies ( $I^2$  value > 50% was considered significant). Diagnostic  
43 performance for prediction was further assessed. The main purpose was to assess the sensitivity  
44 and specificity, the positive and negative diagnostic likelihood ratios (DLR+ and DLR-,  
45 respectively), as well as the diagnostic odds ratio (DOR). Publication bias was evaluated using a  
46 Deeks' funnel plot of the effective sample size. The bivariate model allowed us to incorporate  
47 the correlation that might exist between the logit-transformed values of paired sensitivity and  
48 specificity across studies. Each data point of the summary receiver operator characteristic  
49  
50  
51  
52  
53  
54  
55  
56  
57  
58  
59  
60

(SROC) graph was derived from a separate study. Based on these points, the smooth SROC curve was formed to reveal the accuracy of the pooled measures. The likelihood ratio scatter plots graphically showed summary spots of likelihood ratios obtained from the average sensitivity and specificity. Statistical analyses were performed using STATA 15.1 (StataCorp LP, College Station, TX) and RevMan 5.3 (Cochrane Collaboration, Copenhagen, Denmark).  $p \leq 0.05$  was considered statistically significant.

### **Patient and public involvement statement**

Neither patients nor the public were involved in the design and planning of the study.

## **Results**

### **Literature search and selection of studies**

The comprehensive search yielded 545 records for analysis. Records with duplicate titles and abstracts (89) were excluded. Additionally, 36 review articles, 144 conference abstracts, 13 basic research articles, 120 case reports, editorials, notes and surveys, 86 non-relevant records and 10 other language studies were excluded. The remaining 47 full-text articles were further assessed for eligibility. For calculating pooled WMD, 24 articles were excluded due to insufficient data and 23 studies were included. For the pooled DOR analysis, 29 articles were excluded due to insufficient data and 3 articles were excluded due to inconsistent results according to pooled WMD results ( $^{18}\text{F}$ -FDG uptake was significantly lower in *EGFR* mutant group; the pooled sensitivity, specificity and DOR were also calculated without excluding the 3 studies). The remaining 15 studies were included in the meta-analysis. The detailed procedure of study selection is shown in Figure 1.

### **Study description and publication bias**

All included patients underwent a  $^{18}\text{F}$ -FDG PET/CT examination and *EGFR* gene test. *EGFR* mutations analysis was carried out on tissue specimens obtained from resection, aspiration or biopsy. A total of 5220 patients were included in the WMD analysis, and  $\text{SUV}_{\text{max}}$  between the *EGFR* mutant and wild-type groups were compared. The patients were enrolled retrospectively in all 23 of the included studies. The pooled comparison of the studies demonstrated that  $^{18}\text{F}$ -

FDG uptake was significantly lower in the *EGFR* mutant group (WMD -1.73; 95% CI -2.34 - -1.12;  $p < 0.05$ ;  $I^2 = 78.2\%$ , Figure 2). The most common domains with reporting deficiencies related to the patient selection, as there was no random sequence generation for retrospective studies (Figure 3A). Visual analysis of the funnel plot was not suggestive of publication bias using Egger's test ( $p = 0.786$ ; Figure 3B). The principal characteristics of the included 23 studies are shown in Table 1.

In order to predict presence of *EGFR* mutations in NSCLC patients, a total of 3574 patients were included in the analysis, including 2046 male and 1528 female cases. The average age was 62.9 years old, 90.3% had LUAD and 42.8% were smokers. All 15 studies enrolled patients retrospectively. The *EGFR* mutation incidence rate was 41.2% with a range of 21.0%–57.5%.  $SUV_{max}$  was used for interpretation of  $^{18}F$ -FDG PET/CT to predict the *EGFR* mutation status. The principal characteristics of the 15 included studies are also shown in Table 1. Most of the observational studies demonstrated a low risk of bias as assessed by the QUADAS-2 tool (Figure 4A). Deek's funnel plot asymmetry tests were performed to assess a possible publication bias. No significant bias was found ( $p = 0.089$ ; Figure 4B).

**Table 1** Characteristics of the included studies

| Authors            | Year | Country | Study design | Patient number | Age (mean) | Gender (M/F) | Smoker | LUAD | Genetic test | <i>EGFR</i> mutant /wild-type | $^{18}F$ -FDG injection dose | Cut-off value | Meta-analysis |
|--------------------|------|---------|--------------|----------------|------------|--------------|--------|------|--------------|-------------------------------|------------------------------|---------------|---------------|
| Caicedo et al [17] | 2014 | Spain   | R            | 102            | 62         | 62/40        | 73     | 90   | PCR          | 22/80                         | NA                           | NA            | WMD           |
| Chen et al [10]    | 2019 | China   | R            | 157            | 66         | 84/73        | 68     | 144  | PCR          | 54/103                        | 481 MBq                      | 9.92          | WMD/ DOR      |
| Cho et al [18]     | 2016 | Korea   | R            | 61             | 61         | 33/28        | 29     | 58   | PCR          | 30/31                         | 5.5 MBq/kg                   | 9.6           | WMD/ DOR      |
| Choi et al [19]    | 2012 | Korea   | R            | 163            | 60         | 99/64        | 73     | 130  | PCR          | 57/106                        | 5.18 MBq/kg                  | NA            | WMD           |
| Choi et al [20]    | 2013 | Korea   | R            | 331            | 62         | 158/173      | 145    | 331  | PCR          | 156/175                       | 5.18 MBq/kg                  | NA            | WMD           |
| Chung et al [21]   | 2010 | Korea   | R            | 106            | 64         | 63/43        | 60     | 97   | PCR          | 42/64                         | 4.8 MBq/kg                   | NA            | WMD           |
| Gao et al [22]     | 2020 | China   | R            | 167            | 58         | 87/80        | 67     | 162  | PCR          | 72/94                         | 370 MBq                      | 11.5          | DOR           |
| Gu et al [23]      | 2017 | China   | R            | 210            | 59         | 132/78       | 90     | 161  | PCR          | 70/140                        | 5.18 MBq/kg                  | 9             | DOR           |
| Guan et al [24]    | 2016 | China   | R            | 316            | 60         | 216/100      | 162    | 242  | PCR          | 126/190                       | NA                           | 8.1           | WMD/ DOR      |
| Hong et al [25]    | 2020 | Korea   | R            | 134            | 69         | 89/45        | 76     | 134  | PCR          | 62/72                         | 52/7MBq/kg                   | 9.6           | WMD/ DOR      |
| Huang et al [11]   | 2010 | China   | R            | 77             | 62         | 44/33        | 16     | 77   | PCR          | 49/28                         | 370MBq                       | NA            | WMD           |

|                          |      |            |   |     |    |         |     |     |     |         |                 |       |          |
|--------------------------|------|------------|---|-----|----|---------|-----|-----|-----|---------|-----------------|-------|----------|
| Kanmaz et al [12]        | 2016 | Turkey     | R | 218 | 62 | 151/67  | 155 | 218 | PCR | 63/155  | 3.7-5.2 MBq/kg  | NA    | WMD      |
| Kim et al [26]           | 2016 | Korea      | R | 198 | 62 | 113/85  | 68  | 183 | PCR | 101/97  | 5.18 MBq/kg     | NA    | WMD      |
| Kim et al [27]           | 2018 | Korea      | R | 232 | 64 | 104/128 | 93  | 232 | PCR | 132/100 | 5.18 MBq/kg     | NA    | WMD      |
| Lee et al [28]           | 2015 | Korea      | R | 206 | 68 | 148/58  | 71  | 135 | PCR | 47/159  | 481 MBq         | 11.7  | DOR      |
| Lee et al [29]           | 2015 | China      | R | 71  | 65 | 33/38   | 19  | 71  | PCR | 48/23   | 370 MBq         | NA    | WMD      |
| Liao et al [30]          | 2020 | China      | R | 191 | 63 | 101/90  | 65  | 191 | PCR | 63/128  | 3.7 MBq/kg      | 7.78  | DOR      |
| Lv et al [31]            | 2018 | China      | R | 808 | 59 | 468/340 | 310 | 731 | PCR | 371/437 | 5.5 MBq/kg      | 7     | WMD/ DOR |
| Liu et al [32]           | 2017 | China      | R | 87  | 60 | 49/38   | 32  | 78  | PCR | 41/46   | NA              | 10.4  | DOR      |
| Mak et al [33]           | 2011 | USA        | R | 100 | 65 | 39/61   | 73  | 90  | PCR | 24/76   | 5.55-7.4MBq     | NA    | WMD      |
| Minamimoto et al [34]    | 2017 | USA        | R | 127 | 67 | NA      | NA  | 127 | PCR | 32/95   | 12-17 mCi       | NA    | WMD      |
| Mu et al [35]            | 2020 | China, USA | R | 681 | 63 | 378/303 | 315 | 567 | PCR | 312/369 | NA              | NA    | WMD      |
| Na et al [36]            | 2010 | Korea      | R | 100 | 64 | 68/32   | 57  | 53  | PCR | 21/79   | 370 MBq         | 9.2   | DOR      |
| Qiang et al [37]         | 2016 | China      | R | 97  | 65 | 50/47   | 51  | 97  | PCR | 44/53   | 7.4 MBq/kg      | NA    | WMD      |
| Suárez-Piñera et al [38] | 2018 | Spain      | R | 106 | 71 | NA      | NA  | 106 | PCR | 24/82   | 5.29 MBq/kg     | NA    | WMD      |
| Takamochi et al [39]     | 2017 | Japan      | R | 734 | 68 | 367/367 | 363 | 734 | PCR | 334/400 | 3.5 MBq/kg      | 2.69  | WMD/ DOR |
| Whi et al [40]           | 2020 | Korea      | R | 64  | 66 | 34/30   | 25  | 64  | PCR | 29/35   | 5.18 MBq/kg     | 9.5   | WMD/ DOR |
| Yang et al [8]           | 2019 | China      | R | 200 | 61 | 108/92  | 68  | 200 | PCR | 115/85  | 3.7-6.66 MBq/kg | 6.15  | WMD/ DOR |
| Zhu et al [9]            | 2018 | China      | R | 139 | 62 | 62/77   | 46  | 139 | PCR | 74/65   | 4.2 MBq/kg      | 11.19 | WMD/ DOR |

LUAD, Lung adenocarcinoma; WMD, weighted mean difference; DOR, diagnostic odds ratio.

### Diagnostic effectiveness of <sup>18</sup>F-FDG PET/CT

The diagnostic effectiveness of <sup>18</sup>F-FDG PET/CT in predicting *EGFR* mutation in NSCLC patients was meta-analyzed across 15 studies. The pooled sensitivity was 0.70 (95% CI 0.60-0.79) with heterogeneity ( $I^2 = 90.86$ , 95% CI 87.38–94.34,  $p < 0.05$ ). The pooled specificity was 0.59 (95% CI 0.52-0.66) with heterogeneity ( $I^2 = 91.43$ , 95% CI 88.23–94.63,  $p < 0.05$ ; Figure 5). DLR syntheses gave an overall DLR+ of 1.74 (95% CI 1.49–2.03) and DLR– of 0.50 (95% CI 0.38–0.65; Figure 6). The pooled DOR was 3.50 (95% CI 2.37-5.17; Figure 6). The area under curve (AUC) obtained from SROC was 0.68 (95% CI 0.64-0.72; Figure 7A). Lower pooled



1  
2  
3 sensitivity, specificity and DOR were shown with the three studies included in the prediction of  
4 EGFR mutations in NSCLC patients (see online supplementary file Figure S1).  
5  
6  
7

### 8 **Likelihood ratio scatter plot**

9  
10 The summary value of likelihood ratios obtained from the average sensitivity and specificity  
11 shown in the likelihood ratio scatter plot (Figure 7B) was located in the lower right quadrant,  
12 which indicated that  $^{18}\text{F}$ -FDG PET/CT may not be useful for predicting whether there is an  
13 *EGFR* mutation (when positive) or not (when negative).  
14  
15  
16

### 17 **Discussion**

18  
19 In light of the advances in the precise treatment of lung cancer, identifying targetable mutations  
20 at the time of diagnosis has become the key to determining the best treatment strategies. The  
21 identification of the *EGFR* mutation led to an important paradigm shift in the treatment and  
22 survival of NSCLC patients. A typical molecular imaging technique,  $^{18}\text{F}$ -FDG PET/CT has been  
23 used in prediction of *EGFR* status in NSCLC patients. However, various studies have published  
24 contradictory results. This is the first systematic review and meta-analysis to summarize current  
25 evidence for the use of  $^{18}\text{F}$ -FDG PET/CT to predict *EGFR* status in NSCLC patients. The  
26 principal findings of this meta-analysis showed low sensitivity and specificity of  $^{18}\text{F}$ -FDG  
27 PET/CT in the prediction of *EGFR* mutations.  
28  
29  
30  
31  
32  
33  
34  
35

36  
37 Previous studies on the value of  $^{18}\text{F}$ -FDG PET in predicting *EGFR* status have been  
38 conflicting. Accumulation of  $^{18}\text{F}$ -FDG was reported to be lower in NSCLC patients, which can  
39 be used to predict *EGFR* status. Na et al. first reported that patients with low  $\text{SUV}_{\text{max}}$  were more  
40 likely to have *EGFR* mutations than those with high  $\text{SUV}_{\text{max}}$ . When using 9.2 as the cut-off value,  
41 the specificity and sensitivity reached 72% and 67%, respectively[36]. Lee et al. concluded that  
42  $^{18}\text{F}$ -FDG avidity had no significant clinical value in predicting *EGFR* status, while the univariate  
43 analysis showed that  $\text{SUV}_{\text{max}}$  was significantly correlated with *EGFR* mutation using 11.7 as the  
44 cut-off value [28]. Cho et al. also found that mutant *EGFR* had relatively lower glycolysis  
45 compared with wild-type *EGFR*. A cut-off  $\text{SUV}_{\text{max}}$  value of 9.6 had the highest sensitivity  
46 (79.3 %) in predicting *EGFR* mutations [18]. Research by Guan et al. showed that  $^{18}\text{F}$ -FDG  
47 uptake values could effectively predict the *EGFR* mutation status of NSCLC patients. ROC  
48 curve analysis revealed the AUC was 0.65, with an  $\text{SUV}_{\text{max}}$  value of 8.1 as the cut-off point [24].  
49  
50  
51  
52  
53  
54  
55  
56  
57  
58  
59  
60

1  
2  
3 Next, other studies further demonstrated that low  $SUV_{max}$  was a significant predictor of *EGFR*  
4 mutations using different cut off values [8, 9, 23, 31, 39]. Chen et al. demonstrated that using  
5 9.92 as the  $SUV_{max}$  cut-off point can best discriminate the *EGFR* mutation status with an AUC of  
6 0.75, and they identified that the mechanism responsible for the decreased FDG uptake  
7 associated with mutant *EGFR* was through the NOX4/ROS/GLUT1 axis [10]. However, multiple  
8 groups have reported no association between  $SUV_{max}$  and *EGFR* status. Mak et al. reported that  
9 high normalized  $SUV_{max}$  only correlated with the *EGFR* wild-type genotype [33]. Moreover,  
10 several studies have reported conflicting results. Huang et al. found that a higher  $^{18}F$ -FDG uptake  
11 with a  $SUV_{max}$  cut-off value of 9.5 correlates with the presence of *EGFR* mutations [11]. While  
12 Ko et al. showed a trend of higher  $SUV_{max}$  in patients with an *EGFR* mutation, with an optimal  
13 cut-off was 6 [13]. Kanmaz et al. made a similar conclusion, with an  $SUV_{max}$  cut-off value of  
14 13.65 as the predictor [12].

15  
16  
17 Our results indicated the  $^{18}F$ -FDG PET/CT has low sensitivity and specificity in predicting  
18 *EGFR* mutations. Comparison of mean  $SUV_{max}$  between *EGFR* mutant and wild-type was first  
19 pooled with WMD to determine the relationship between *EGFR* status and FDG uptake.  
20 According to result of WMD meta-analysis,  $^{18}F$ -FDG uptake was significantly lower in the  
21 *EGFR* mutant group. Thus, studies that reported higher  $^{18}F$ -FDG uptake for prediction of *EGFR*  
22 mutation in NSCLC patients were excluded in the DOR analysis. The meta-analysis showed low  
23 pooled sensitivity of 70% and specificity of 59% for prediction. The low DOR of 0.68 as well as  
24 the likelihood ratio scatter plot indicated that  $^{18}F$ -FDG PET/CT might not be useful—or, at least,  
25 should be used with caution—for predicting *EGFR* mutations in NSCLC patients. In addition,  
26 the obvious heterogeneity, especially for the main parameters, indicated that the differences  
27 between studies cannot be ignored and conclusion should be drawn carefully.

28  
29  
30 Many efforts have been made to improve prediction efficacy, which may be the direction of  
31 future research. More  $^{18}F$ -FDG PET/CT semi-quantitative parameters including metabolic tumor  
32 volume and total glucose glycolysis were investigated to potentially predict *EGFR* mutations [21,  
33 30]. Recent studies also focused on  $^{18}F$ -FDG PET/CT radiomics [41, 42]. Radiomics refers to the  
34 extraction of quantitative characteristics from medical images [43]. The PET/CT-based radiomic  
35 characteristics showed good performance in the prediction of *EGFR* mutations in NSCLC  
36 patients [35, 44]. Although the predication efficacy improved, its clinical application requires  
37  
38  
39  
40  
41  
42  
43  
44  
45  
46  
47  
48  
49  
50  
51  
52  
53  
54  
55  
56  
57  
58  
59  
60

1  
2  
3 additional studies to confirm and optimize. Beyond  $^{18}\text{F}$ -FDG, novel radiotracers have also been  
4 investigated.  $^{18}\text{F}$ -MPG PET/CT was demonstrated to be a valid strategy for stratifying NSCLC  
5 patients with *EGFR*-activating mutations for *EGFR*-TKI treatment [45], but this radiotracer is  
6 not routinely available. Other promising studies are under way to translate these novel  
7 approaches into the clinic to guide effective precision therapy for NSCLC patients.  
8  
9

### 10 11 12 **Strengths and limitations**

13  
14  
15 The strength of this study is that the conflicting results were first analyzed using WMD analysis,  
16 so that a more reasonable meta-analysis can be performed on the accuracy of the diagnosis. The  
17 high level of heterogeneity is the main limitation. However, this can be addressed using a  
18 random effects model. The first area of heterogeneity is related to NSCLC subtypes. LUAD is  
19 the main pathological type of NSCLC, but even within LUAD, there are different subtypes. For  
20 example, alveolar carcinoma demonstrates relatively low  $^{18}\text{F}$ -FDG uptake. Second,  $\text{SUV}_{\text{max}}$  is  
21 the most stable and commonly used index, but there are many factors that affect  $\text{SUV}_{\text{max}}$ ,  
22 including tumor size, glucose level, and image acquisition and reconstruction, especially for  
23 different PET/CT equipment with different acquisition parameters. Third, the number of studies  
24 included in this study was small, especially for subgroup analysis. To further study these issues,  
25 an increased number of high-quality studies need to be carried out in the future.  
26  
27  
28  
29  
30  
31  
32  
33

### 34 35 **Conclusion**

36  
37 Our meta-analysis results showed that  $^{18}\text{F}$ -FDG PET/CT had low pooled sensitivity and  
38 specificity for *EGFR* mutation prediction. The low DOR and the likelihood ratio scatter plot  
39 indicated that  $^{18}\text{F}$ -FDG PET/CT might not be useful—or, at least, that it should be used with  
40 caution—for predicting *EGFR* mutations in NSCLC patients.  
41  
42  
43  
44  
45  
46  
47

### 48 **Ethics statement**

49  
50 This study was a systematic review and meta-analysis. Ethics committee approval was not  
51 necessary because all data were carefully extracted from existing literature.  
52  
53

### 54 **Author contributions**

BD is the first author. BD and YL obtained funding. BD, XL and YL designed the study. BD, YC, GL and SW collected and analyzed the data. BD drafted the manuscript. BD and YL contributed to the interpretation of the results and critical revision of the manuscript for important intellectual content, and approved the final version of the manuscript. All authors have read and approved the final manuscript. BD and YL are the study guarantors.

### Funding

This work was supported by the National Natural Science Foundation of China (81971652) and Young Scholars Program of China Medical University (QGZ-2018036).

### Competing interests

We have read and understood the BMJ policy on declaration of interests and declare that we have no competing interests.

### Data sharing

No additional data are available

### References

- 1 Ferlay J, Colombet M, Soerjomataram I, et al. Estimating the global cancer incidence and mortality in 2018: GLOBOCAN sources and methods. *Int J Cancer* 2019;1941–53. doi:10.1002/ijc.31937 [published Online First: 6 December 2018].
- 2 Travis WD. Pathology of lung cancer. *Clin Chest Med* 2011;32(4):669–92.
- 3 McLoughlin EM, Gentzler RD. Epidermal Growth Factor Receptor Mutations. *Thorac Surg Clin* 2020;30(2):127–36.
- 4 Sharma SV, Bell DW, Settleman J, et al. Epidermal growth factor receptor mutations in lung cancer. *Nat Rev Cancer* 2007;7(3):169–81.
- 5 Del Re M, Crucitta S, Gianfilippo G, et al. Understanding the Mechanisms of Resistance in EGFR-Positive NSCLC: From Tissue to Liquid Biopsy to Guide Treatment Strategy. *Int J Mol Sci* 2019. doi:10.3390/ijms20163951 [published Online First: 14 August 2019].
- 6 Aerts HJWL. The Potential of Radiomic-Based Phenotyping in Precision Medicine: A Review. *JAMA Oncol* 2016;2(12):1636–42.
- 7 Zhang H, Cai W, Wang Y, et al. CT and clinical characteristics that predict risk of EGFR mutation in non-small cell lung cancer: a systematic review and meta-analysis. *Int J Clin Oncol* 2019:649–59. doi:10.1007/s10147-019-01403-3 [published Online First: 5 March 2019].

- 1
  - 2
  - 3
  - 4
  - 5
  - 6
  - 7
  - 8 Yang B, Wang QG, Lu M, et al. Correlations Study Between 18F-FDG PET/CT Metabolic Parameters Predicting Epidermal Growth Factor Receptor Mutation Status and Prognosis in Lung Adenocarcinoma. *Front Oncol* 2019:589. doi:10.3389/fonc.2019.00589 [published Online First: 18 July 2019].
  - 9
  - 10
  - 11
  - 12
  - 13
  - 14
  - 15
  - 16
  - 17
  - 18
  - 19
  - 20
  - 21
  - 22
  - 23
  - 24
  - 25
  - 26
  - 27
  - 28
  - 29
  - 30
  - 31
  - 32
  - 33
  - 34
  - 35
  - 36
  - 37
  - 38
  - 39
  - 40
  - 41
  - 42
  - 43
  - 44
  - 45
  - 46
  - 47
  - 48
  - 49
  - 50
  - 51
  - 52
  - 53
  - 54
  - 55
  - 56
  - 57
  - 58
  - 59
  - 60
- 8 9 10 11 12 13 14 15 16 17 18 19 20 21 22 23 24 25 26 27 28 29 30 31 32 33 34 35 36 37 38 39 40 41 42 43 44 45 46 47 48 49 50 51 52 53 54 55 56 57 58 59 60
- 8 Yang B, Wang QG, Lu M, et al. Correlations Study Between 18F-FDG PET/CT Metabolic Parameters Predicting Epidermal Growth Factor Receptor Mutation Status and Prognosis in Lung Adenocarcinoma. *Front Oncol* 2019:589. doi:10.3389/fonc.2019.00589 [published Online First: 18 July 2019].
- 9 Zhu L, Yin G, Chen W, et al. Correlation between EGFR mutation status and F18 - fluorodeoxyglucose positron emission tomography-computed tomography image features in lung adenocarcinoma. *Thorac Cancer* 2019:659–64. doi:10.1111/1759-7714.12981 [published Online First: 18 February 2019].
- 10 Chen L, Zhou Y, Tang X, et al. EGFR mutation decreases FDG uptake in non-small cell lung cancer via the NOX4/ROS/GLUT1 axis. *Int J Oncol* 2019:370–80. doi:10.3892/ijo.2018.4626 [published Online First: 6 November 2018].
- 11 Huang C-T, Yen R-F, Cheng M-F, et al. Correlation of F-18 fluorodeoxyglucose-positron emission tomography maximal standardized uptake value and EGFR mutations in advanced lung adenocarcinoma. *Med Oncol* 2010:9–15. doi:10.1007/s12032-008-9160-1 [published Online First: 7 January 2009].
- 12 Kanmaz ZD, Aras G, Tuncay E, et al. Contribution of <sup>18</sup>F-fluorodeoxyglucose positron emission tomography uptake and TTF-1 expression in the evaluation of the EGFR mutation in patients with lung adenocarcinoma. *Cancer Biomark* 2016;16(3):489–98.
- 13 Ko K-H, Hsu H-H, Huang T-W, et al. Value of <sup>18</sup>F-FDG uptake on PET/CT and CEA level to predict epidermal growth factor receptor mutations in pulmonary adenocarcinoma. *Eur J Nucl Med Mol Imaging* 2014;41(10):1889–97.
- 14 Machado Medeiros T, Altmayer S, Watte G, et al. 18F-FDG PET/CT and whole-body MRI diagnostic performance in M staging for non-small cell lung cancer: a systematic review and meta-analysis. *Eur Radiol* 2020:3641–49. doi:10.1007/s00330-020-06703-1 [published Online First: 3 March 2020].
- 15 Kim S-J, Pak K, Kim K. Diagnostic performance of F-18 FDG PET/CT for prediction of KRAS mutation in colorectal cancer patients: a systematic review and meta-analysis. *Abdom Radiol (NY)* 2019;44(5):1703–11.
- 16 Ayati N, Sadeghi R, Kiamanesh Z, et al. The value of 18F-FDG PET/CT for predicting or monitoring immunotherapy response in patients with metastatic melanoma: a systematic review and meta-analysis. *Eur J Nucl Med Mol Imaging* 2020.
- 17 Caicedo C, Garcia-Velloso MJ, Lozano MD, et al. Role of <sup>18</sup>F-FDG PET in prediction of KRAS and EGFR mutation status in patients with advanced non-small-cell lung cancer. *Eur J Nucl Med Mol Imaging* 2014;41(11):2058–65.
- 18 Cho A, Hur J, Moon YW, et al. Correlation between EGFR gene mutation, cytologic tumor markers, 18F-FDG uptake in non-small cell lung cancer. *BMC cancer* 2016;16:224.
- 19 Choi Y-J, Cho BC, Jeong YH, et al. Correlation between (18)f-fluorodeoxyglucose uptake and epidermal growth factor receptor mutations in advanced lung cancer. *Nucl Med Mol Imaging* 2012:169–75. doi:10.1007/s13139-012-0142-z [published Online First: 7 June 2012].
- 20 Choi H, Paeng JC, Kim D-W, et al. Metabolic and metastatic characteristics of ALK-rearranged lung adenocarcinoma on FDG PET/CT. *Lung Cancer* 2013:242–47. doi:10.1016/j.lungcan.2012.11.021 [published Online First: 20 December 2012].

- 1  
2  
3 21 Chung HW, Lee KY, Kim HJ, et al. FDG PET/CT metabolic tumor volume and total lesion  
4 glycolysis predict prognosis in patients with advanced lung adenocarcinoma. *J Cancer Res Clin*  
5 *Oncol* 2014;89–98. doi:10.1007/s00432-013-1545-7 [published Online First: 6 November 2013].  
6  
7 22 Gao X-C, Wei C-H, Zhang R-G, et al. 18F-FDG PET/CT SUVmax and serum CEA levels as  
8 predictors for EGFR mutation state in Chinese patients with non-small cell lung cancer. *Oncol Lett*  
9 2020;61. doi:10.3892/ol.2020.11922 [published Online First: 29 July 2020].  
10  
11 23 Gu J, Xu S, Huang L, et al. Value of combining serum carcinoembryonic antigen and PET/CT in  
12 predicting EGFR mutation in non-small cell lung cancer. *J Thorac Dis* 2018;10(2):723–31.  
13  
14 24 Guan J, Xiao NJ, Chen M, et al. 18F-FDG uptake for prediction EGFR mutation status in non-small  
15 cell lung cancer. *Medicine (Baltimore)* 2016;95(30):e4421.  
16  
17 25 Hong IK, Lee JM, Hwang IK, et al. Diagnostic and Predictive Values of 18F-FDG PET/CT  
18 Metabolic Parameters in EGFR-Mutated Advanced Lung Adenocarcinoma. *Cancer Manag Res*  
19 2020;6453–65. doi:10.2147/CMAR.S259055 [published Online First: 28 July 2020].  
20  
21 26 Kim TJ, Lee C-T, Jheon SH, et al. Radiologic Characteristics of Surgically Resected Non-Small  
22 Cell Lung Cancer With ALK Rearrangement or EGFR Mutations. *The Annals of Thoracic Surgery*  
23 2016;101(2):473–80.  
24  
25 27 Kim Y-I, Paeng JC, Park YS, et al. Relation of EGFR Mutation Status to Metabolic Activity in  
26 Localized Lung Adenocarcinoma and Its Influence on the Use of FDG PET/CT Parameters in  
27 Prognosis. *AJR Am J Roentgenol* 2018;1346–51. doi:10.2214/AJR.17.18916 [published Online First:  
28 16 March 2018].  
29  
30 28 Lee SM, Bae SK, Jung SJ, et al. FDG uptake in non-small cell lung cancer is not an independent  
31 predictor of EGFR or KRAS mutation status: a retrospective analysis of 206 patients. *Clin Nucl*  
32 *Med* 2015;40(12):950–58.  
33  
34 29 Lee EYP, Khong P-L, Lee VHF, et al. Metabolic phenotype of stage IV lung adenocarcinoma:  
35 relationship with epidermal growth factor receptor mutation. *Clin Nucl Med* 2015;40(3):e190-5.  
36  
37 30 Liao X, Cui Y, Chen X, et al. Primary metabolic tumor volume from 18F-FDG PET/CT associated  
38 with epidermal growth factor receptor mutation in lung adenocarcinoma patients. *Nucl Med*  
39 *Commun* 2020;41(11):1210–17.  
40  
41 31 Lv Z, Fan J, Xu J, et al. Value of 18F-FDG PET/CT for predicting EGFR mutations and positive  
42 ALK expression in patients with non-small cell lung cancer: a retrospective analysis of 849 Chinese  
43 patients. *Eur J Nucl Med Mol Imaging* 2018;735–50. doi:10.1007/s00259-017-3885-z [published  
44 Online First: 21 November 2017].  
45  
46 32 Liu A, Han A, Zhu H, et al. The role of metabolic tumor volume (MTV) measured by 18F FDG  
47 PET/CT in predicting EGFR gene mutation status in non-small cell lung cancer. *Oncotarget*  
48 2017;8(20):33736–44.  
49  
50 33 Mak RH, Digumarthy SR, Muzikansky A, et al. Role of 18F-fluorodeoxyglucose positron emission  
51 tomography in predicting epidermal growth factor receptor mutations in non-small cell lung cancer.  
52 *Oncologist* 2011;319–26. doi:10.1634/theoncologist.2010-0300 [published Online First: 21  
53 February 2011].  
54  
55 34 Minamimoto R, Jamali M, Gevaert O, et al. Prediction of EGFR and KRAS mutation in non-small  
56 cell lung cancer using quantitative 18F FDG-PET/CT metrics. *Oncotarget* 2017;52792–801.  
57 doi:10.18632/oncotarget.17782 [published Online First: 10 May 2017].  
58  
59  
60

- 1  
2  
3 35 Mu W, Jiang L, Zhang J, et al. Non-invasive decision support for NSCLC treatment using PET/CT  
4 radiomics. *Nat Commun* 2020:5228. doi:10.1038/s41467-020-19116-x [published Online First: 16  
5 October 2020].  
6  
7 36 Im Na I, Byun BH, Kim KM, et al. 18F-FDG uptake and EGFR mutations in patients with non-  
8 small cell lung cancer: a single-institution retrospective analysis. *Lung Cancer* 2010;67(1):76–80.  
9  
10 37 Qiang G, Huang W, Liang C, et al. Association between histopathological subtype, 18F-  
11 fluorodeoxyglucose uptake and epidermal growth factor receptor mutations in lung adenocarcinoma.  
12 *Oncol Lett* 2016:1769–77. doi:10.3892/ol.2016.4154 [published Online First: 27 January 2016].  
13  
14 38 Suárez-Piñera M, Belda-Sanchis J, Taus A, et al. FDG PET-CT SUVmax and IASLC/ATS/ERS  
15 histologic classification: a new profile of lung adenocarcinoma with prognostic value. *Am J Nucl*  
16 *Med Mol Imaging* 2018:100–09.  
17  
18 39 Takamochi K, Mogushi K, Kawaji H, et al. Correlation of EGFR or KRAS mutation status with  
19 18F-FDG uptake on PET-CT scan in lung adenocarcinoma. *PLoS ONE* 2017;12(4):e0175622.  
20  
21 40 Whi W, Ha S, Bae S, et al. Relationship of EGFR Mutation to Glucose Metabolic Activity and  
22 Asphericity of Metabolic Tumor Volume in Lung Adenocarcinoma. *Nucl Med Mol Imaging*  
23 2020:175–82. doi:10.1007/s13139-020-00646-7 [published Online First: 14 June 2020].  
24  
25 41 Li X, Yin G, Zhang Y, et al. Predictive Power of a Radiomic Signature Based on 18F-FDG PET/CT  
26 Images for EGFR Mutational Status in NSCLC. *Front Oncol* 2019:1062.  
27 doi:10.3389/fonc.2019.01062 [published Online First: 15 October 2019].  
28  
29 42 Nair JKR, Saeed UA, McDougall CC, et al. Radiogenomic Models Using Machine Learning  
30 Techniques to Predict EGFR Mutations in Non-Small Cell Lung Cancer. *Can Assoc Radiol J*  
31 2021:109–19. doi:10.1177/0846537119899526 [published Online First: 17 February 2020].  
32  
33 43 Park H, Sholl LM, Hatabu H, et al. Imaging of Precision Therapy for Lung Cancer: Current State of  
34 the Art. *Radiology* 2019:15–29. doi:10.1148/radiol.2019190173 [published Online First: 6 August  
35 2019].  
36  
37 44 Zhang J, Zhao X, Zhao Y, et al. Value of pre-therapy 18F-FDG PET/CT radiomics in predicting  
38 EGFR mutation status in patients with non-small cell lung cancer. *Eur J Nucl Med Mol Imaging*  
39 2020:1137–46. doi:10.1007/s00259-019-04592-1 [published Online First: 14 November 2019].  
40  
41 45 Sun X, Xiao Z, Chen G, et al. A PET imaging approach for determining EGFR mutation status for  
42 improved lung cancer patient management. *Sci Transl Med* 2018;10(431).  
43  
44  
45  
46  
47  
48  
49  
50  
51  
52  
53  
54  
55  
56  
57  
58  
59  
60

1  
2  
3  
4  
5 **Figure 1** Publication screening flowchart.  
6

7  
8 **Figure 2** Forest plot for analysis of  $^{18}\text{F}$ -FDG uptake in *EGFR* mutant versus wild-type in  
9 NSCLC patients.  
10

11  
12 **Figure 3 A:** Risk of bias of included studies. **B:** funnel plot of  $\text{SUV}_{\text{max}}$  in *EGFR* mutant versus  
13 wild-type in NSCLC patients.  
14  
15

16 **Figure 4 A:** Assessment of risk of bias of the included studies using QUADAS-2 tool. **B:**  
17 Deeks's funnel plot of asymmetry test for publication bias showed no significant bias was found.  
18 QUADAS-2, Quality Assessment of Diagnostic Accuracy Studies-2; WMD: weighted mean  
19 difference; ESS: effective sample size.  
20  
21  
22

23  
24 **Figure 5** Forest plot of pooled sensitivity and specificity of  $^{18}\text{F}$ -FDG PET/CT for predicting  
25 *EGFR* mutations in NSCLC patients.  
26  
27

28 **Figure 6** Forest plot of pooled positive, negative DLR and DOR of  $^{18}\text{F}$ -FDG PET/CT for  
29 predicting *EGFR* mutations in NSCLC patients.  
30  
31

32  
33 **Figure 7 A:** Summary receiver operating characteristic (SROC) curves of  $^{18}\text{F}$ -FDG PET/CT for  
34 predicting *EGFR* mutations in NSCLC patients. **B:** Likelihood ratio scatter plot of  $^{18}\text{F}$ -FDG  
35 PET/CT predicting *EGFR* mutations in NSCLC patients.  
36  
37  
38  
39  
40  
41  
42  
43  
44  
45  
46  
47  
48  
49  
50  
51  
52  
53  
54  
55  
56  
57  
58  
59  
60



1  
2  
3  
4  
5  
6  
7  
8  
9  
10  
11  
12  
13  
14  
15  
16  
17  
18  
19  
20  
21  
22  
23  
24  
25  
26  
27  
28  
29  
30  
31  
32  
33  
34  
35  
36  
37  
38  
39  
40  
41  
42  
43  
44  
45  
46  
47  
48  
49  
50  
51  
52  
53  
54  
55  
56  
57  
58  
59  
60

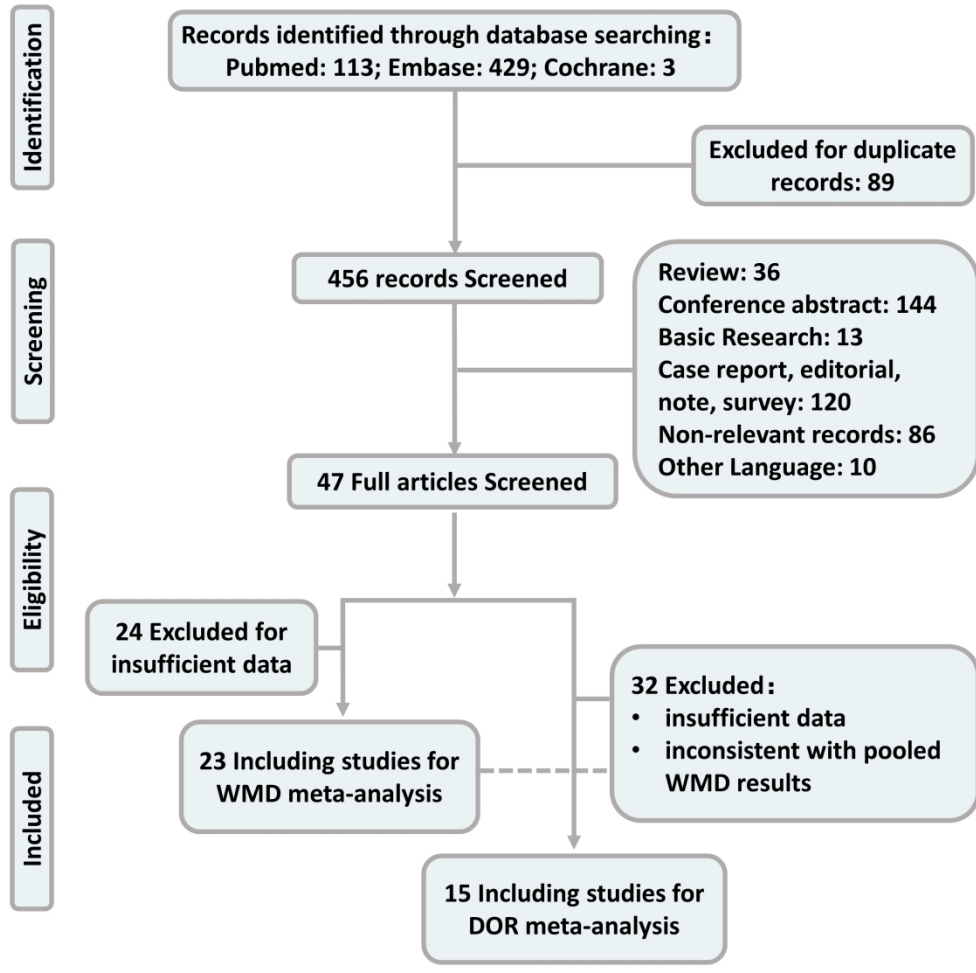

Figure 1 Publication screening flowchart.

234x230mm (300 x 300 DPI)

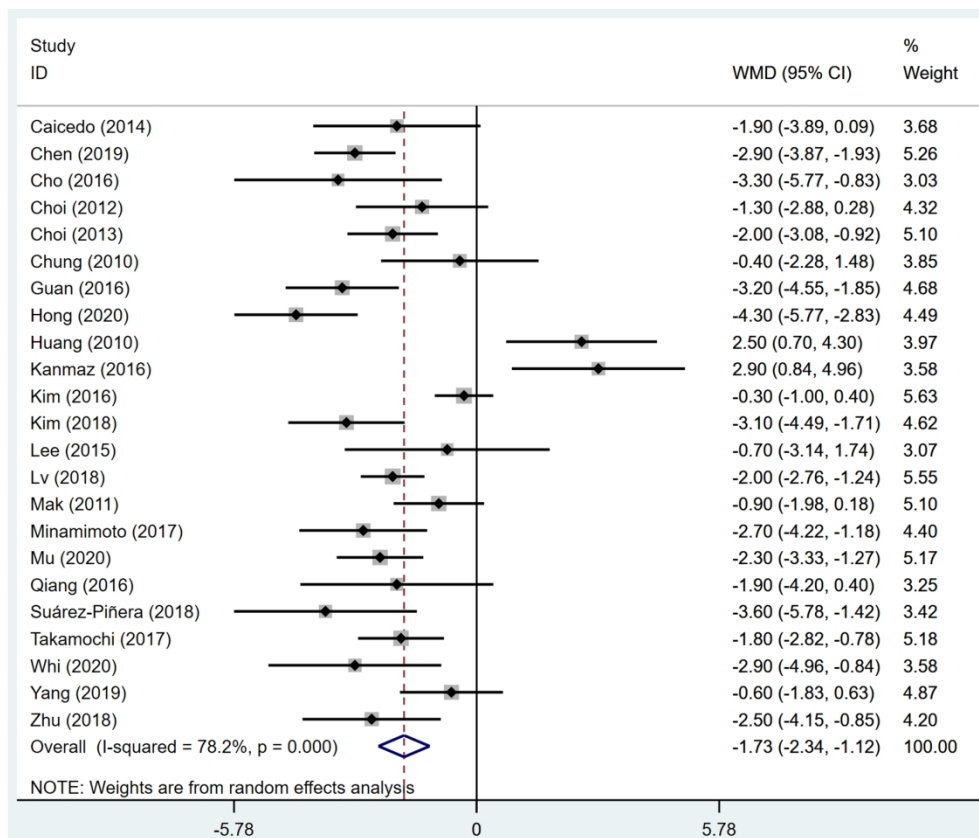

Figure 2 Forest plot for analysis of 18F-FDG uptake in EGFR mutant versus wild-type in NSCLC patients.

228x190mm (300 x 300 DPI)

1  
2  
3  
4  
5  
6  
7  
8  
9  
10  
11  
12  
13  
14  
15  
16  
17  
18  
19  
20  
21  
22  
23  
24  
25  
26  
27  
28  
29  
30  
31  
32  
33  
34  
35  
36  
37  
38  
39  
40  
41  
42  
43  
44  
45  
46  
47  
48  
49  
50  
51  
52  
53  
54  
55  
56  
57  
58  
59  
60

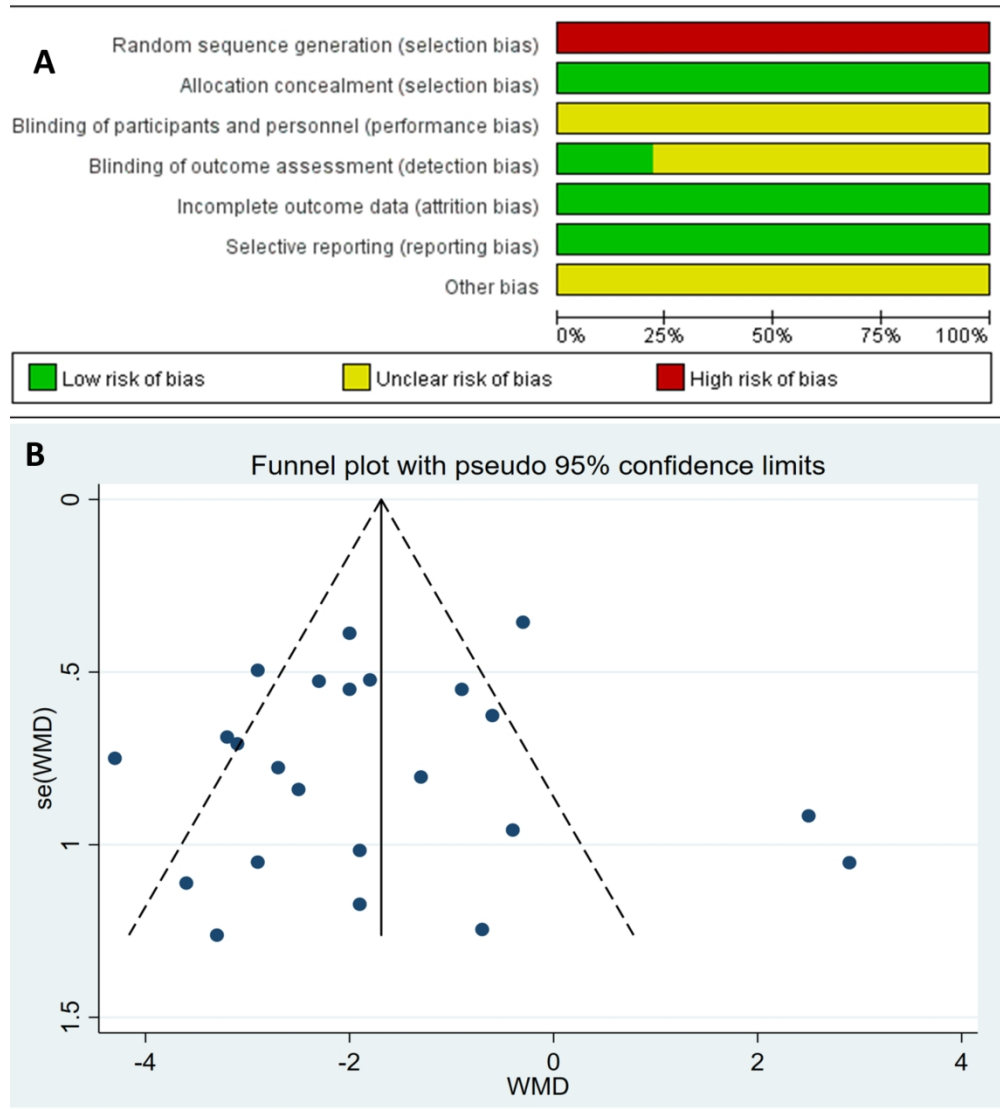

Figure 3 A: Risk of bias of included studies. B: funnel plot of SUVmax in EGFR mutant versus wild-type in NSCLC patients.

170x190mm (300 x 300 DPI)



Figure 4 A: Assessment of risk of bias of the included studies using QUADAS-2 tool. B: Deeks's funnel plot of asymmetry test for publication bias showed no significant bias was found. QUADAS-2, Quality Assessment of Diagnostic Accuracy Studies-2; WMD: weighted mean difference; ESS: effective sample size.

187x190mm (300 x 300 DPI)

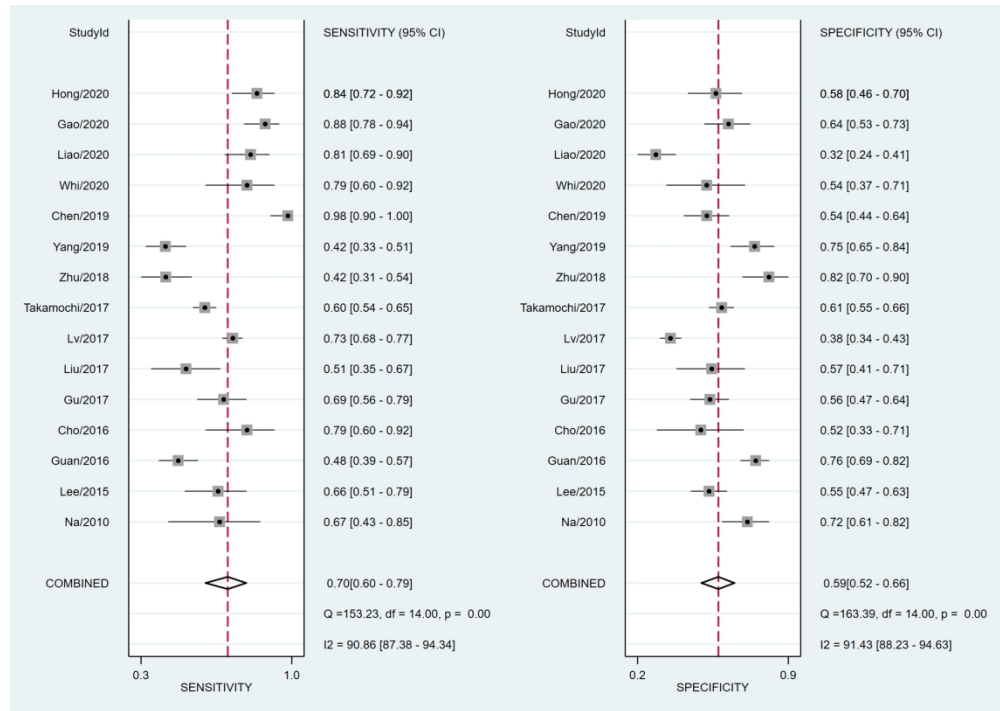

Figure 5 Forest plot of pooled sensitivity and specificity of 18F-FDG PET/CT for predicting EGFR mutations in NSCLC patients.

268x190mm (300 x 300 DPI)



Figure 6 Forest plot of pooled positive, negative DLR and DOR of 18F-FDG PET/CT for predicting EGFR mutations in NSCLC patients.

338x171mm (300 x 300 DPI)

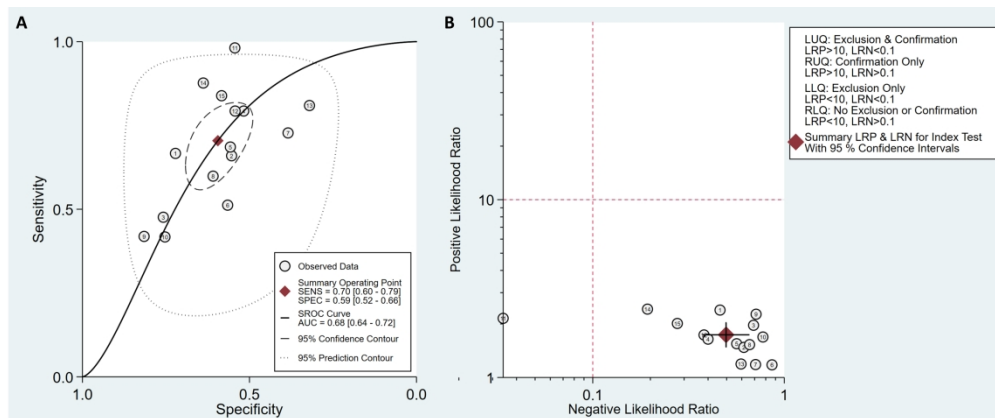

Figure 7 A: Summary receiver operating characteristic (SROC) curves of 18F-FDG PET/CT for predicting EGFR mutations in NSCLC patients. B: Likelihood ratio scatter plot of 18F-FDG PET/CT predicting EGFR mutations in NSCLC patients.

332x137mm (300 x 300 DPI)

Supplementary Appendix

1. Search Strategy (used in PubMed)

((((((((((Epidermal Growth Factor Receptor) OR EGFR)) OR c-erbB-1) OR erbB-1) OR v-erbB)) AND (((((((FDG) OR Fluorodeoxyglucose) OR 2-Fluoro-2-deoxyglucose) OR 2-Fluoro-2-deoxy-D-glucose)) AND ((Positron Emission Tomography) OR PET)) AND (((pulmonary Neoplasm) OR pulmonary cancer)) OR ((lung neoplasm) OR lung cancer)))) AND Mutation

2. Figure S1 Forest plot of pooled sensitivity, specificity and DOR of <sup>18</sup>F-FDG PET/CT for predicting EGFR mutations in NSCLC patients.







# PRISMA 2009 Checklist

| Section/topic                      | #  | Checklist item                                                                                                                                                                                                                                                                                              | Reported on page # |
|------------------------------------|----|-------------------------------------------------------------------------------------------------------------------------------------------------------------------------------------------------------------------------------------------------------------------------------------------------------------|--------------------|
| <b>TITLE</b>                       |    |                                                                                                                                                                                                                                                                                                             |                    |
| Title                              | 1  | Identify the report as a systematic review, meta-analysis, or both.                                                                                                                                                                                                                                         | Page 1             |
| <b>ABSTRACT</b>                    |    |                                                                                                                                                                                                                                                                                                             |                    |
| Structured summary                 | 2  | Provide a structured summary including, as applicable: background; objectives; data sources; study eligibility criteria, participants, and interventions; study appraisal and synthesis methods; results; limitations; conclusions and implications of key findings; systematic review registration number. | Page 1             |
| <b>INTRODUCTION</b>                |    |                                                                                                                                                                                                                                                                                                             |                    |
| Rationale                          | 3  | Describe the rationale for the review in the context of what is already known.                                                                                                                                                                                                                              | Page 4             |
| Objectives                         | 4  | Provide an explicit statement of questions being addressed with reference to participants, interventions, comparisons, outcomes, and study design (PICOS).                                                                                                                                                  | Page 5             |
| <b>METHODS</b>                     |    |                                                                                                                                                                                                                                                                                                             |                    |
| Protocol and registration          | 5  | Indicate if a review protocol exists, if and where it can be accessed (e.g., Web address), and, if available, provide registration information including registration number.                                                                                                                               | Not applicable     |
| Eligibility criteria               | 6  | Specify study characteristics (e.g., PICOS, length of follow-up) and report characteristics (e.g., years considered, language, publication status) used as criteria for eligibility, giving rationale.                                                                                                      | Page 5             |
| Information sources                | 7  | Describe all information sources (e.g., databases with dates of coverage, contact with study authors to identify additional studies) in the search and date last searched.                                                                                                                                  | Page 5             |
| Search                             | 8  | Present full electronic search strategy for at least one database, including any limits used, such that it could be repeated.                                                                                                                                                                               | Page 5             |
| Study selection                    | 9  | State the process for selecting studies (i.e., screening, eligibility, included in systematic review, and, if applicable, included in the meta-analysis).                                                                                                                                                   | Page 5             |
| Data collection process            | 10 | Describe method of data extraction from reports (e.g., piloted forms, independently, in duplicate) and any processes for obtaining and confirming data from investigators.                                                                                                                                  | Page 5             |
| Data items                         | 11 | List and define all variables for which data were sought (e.g., PICOS, funding sources) and any assumptions and simplifications made.                                                                                                                                                                       | Page 5             |
| Risk of bias in individual studies | 12 | Describe methods used for assessing risk of bias of individual studies (including specification of whether this was done at the study or outcome level), and how this information is to be used in any data synthesis.                                                                                      | Page 5, 6          |
| Summary measures                   | 13 | State the principal summary measures (e.g., risk ratio, difference in means).                                                                                                                                                                                                                               | Page 6             |
| Synthesis of results               | 14 | Describe the methods of handling data and combining results of studies, if done, including measures of consistency (e.g., $I^2$ ) for each meta-analysis. <a href="http://bmjopen.bmj.com/site/about/guidelines.xhtml">http://bmjopen.bmj.com/site/about/guidelines.xhtml</a>                               | Page 6             |



# PRISMA 2009 Checklist

Page 1 of 2

| Section/topic                 | #  | Checklist item                                                                                                                                                                                           | Reported on page #           |
|-------------------------------|----|----------------------------------------------------------------------------------------------------------------------------------------------------------------------------------------------------------|------------------------------|
| Risk of bias across studies   | 15 | Specify any assessment of risk of bias that may affect the cumulative evidence (e.g., publication bias, selective reporting within studies).                                                             | Page 5, 6                    |
| Additional analyses           | 16 | Describe methods of additional analyses (e.g., sensitivity or subgroup analyses, meta-regression), if done, indicating which were pre-specified.                                                         | Page 6                       |
| <b>RESULTS</b>                |    |                                                                                                                                                                                                          |                              |
| Study selection               | 17 | Give numbers of studies screened, assessed for eligibility, and included in the review, with reasons for exclusions at each stage, ideally with a flow diagram.                                          | Page 7;<br>Figure 1          |
| Study characteristics         | 18 | For each study, present characteristics for which data were extracted (e.g., study size, PICOS, follow-up period) and provide the citations.                                                             | Page 7;<br>Table 1           |
| Risk of bias within studies   | 19 | Present data on risk of bias of each study and, if available, any outcome level assessment (see item 12).                                                                                                | Page 7;<br>Figure 3,4        |
| Results of individual studies | 20 | For all outcomes considered (benefits or harms), present, for each study: (a) simple summary data for each intervention group (b) effect estimates and confidence intervals, ideally with a forest plot. | Page 8;<br>Figure 2          |
| Synthesis of results          | 21 | Present results of each meta-analysis done, including confidence intervals and measures of consistency.                                                                                                  | Page 9;<br>Figure 2,<br>5, 6 |
| Risk of bias across studies   | 22 | Present results of any assessment of risk of bias across studies (see Item 15).                                                                                                                          | Page 7;<br>Figure 3,<br>4    |
| Additional analysis           | 23 | Give results of additional analyses, if done (e.g., sensitivity or subgroup analyses, meta-regression [see Item 16]).                                                                                    | Page 9;<br>Figure 7          |
| <b>DISCUSSION</b>             |    |                                                                                                                                                                                                          |                              |
| Summary of evidence           | 24 | Summarize the main findings including the strength of evidence for each main outcome; consider their relevance to key groups (e.g., healthcare providers, users, and policy makers).                     | Page 10,11,12                |
| Limitations                   | 25 | Discuss limitations at study and outcome level (e.g., risk of bias), and at review-level (e.g., incomplete retrieval of identified research, reporting bias).                                            | Page 12                      |
| Conclusions                   | 26 | Provide a general interpretation of the results in the context of other evidence, and implications for future research.                                                                                  | Page 12                      |



# PRISMA 2009 Checklist

1  
2  
3  
4  
5  
6  
7  
8  
9  
10  
11  
12  
13  
14  
15  
16  
17  
18  
19  
20  
21  
22  
23  
24  
25  
26  
27  
28  
29  
30  
31  
32  
33  
34  
35  
36  
37  
38  
39  
40  
41  
42  
43  
44  
45  
46  
47

|                |    |                                                                                                                                            |         |
|----------------|----|--------------------------------------------------------------------------------------------------------------------------------------------|---------|
| <b>FUNDING</b> |    |                                                                                                                                            |         |
| Funding        | 27 | Describe sources of funding for the systematic review and other support (e.g., supply of data); role of funders for the systematic review. | Page 13 |

*From:* Moher D, Liberati A, Tetzlaff J, Altman DG, The PRISMA Group (2009). Preferred Reporting Items for Systematic Reviews and Meta-Analyses: The PRISMA Statement. PLoS Med 6(7): e1000097. doi:10.1371/journal.pmed1000097

For more information, visit: [www.prisma-statement.org](http://www.prisma-statement.org).

Page 2 of 2

For peer review only
