# Supplementary material for: Can 18F-FDG PET/CT predict EGFR status in patients with non-small cell lung cancer? A systematic review and meta-analysis
Source: PubMed Central journal article supplement — BMJ Open. 2021 Jun 8;11(6):e044313. doi: 10.1136/bmjopen-2020-044313 (PMC8190055; doi:10.1136/bmjopen-2020-044313), 2021-06-08

## Supplementary Appendix

## 1. Search Strategy (used in PubMed)

(((((Epidermal Growth Factor Receptor) OR EGFR)) OR c-erbB-1) OR erbB-1) OR v-erbB))  
 AND (((((FDG) OR Fluorodeoxyglucose) OR 2-Fluoro-2-deoxyglucose) OR 2-Fluoro-2-deoxy-D-glucose))  
 AND ((Positron Emission Tomography) OR PET)) AND (((pulmonary Neoplasm) OR pulmonary cancer)) OR  
 ((lung neoplasm) OR lung cancer)) AND Mutation

2. Figure S1 Forest plot of pooled sensitivity, specificity and DOR of <sup>18</sup>F-FDG PET/CT for predicting EGFR mutations in NSCLC patients.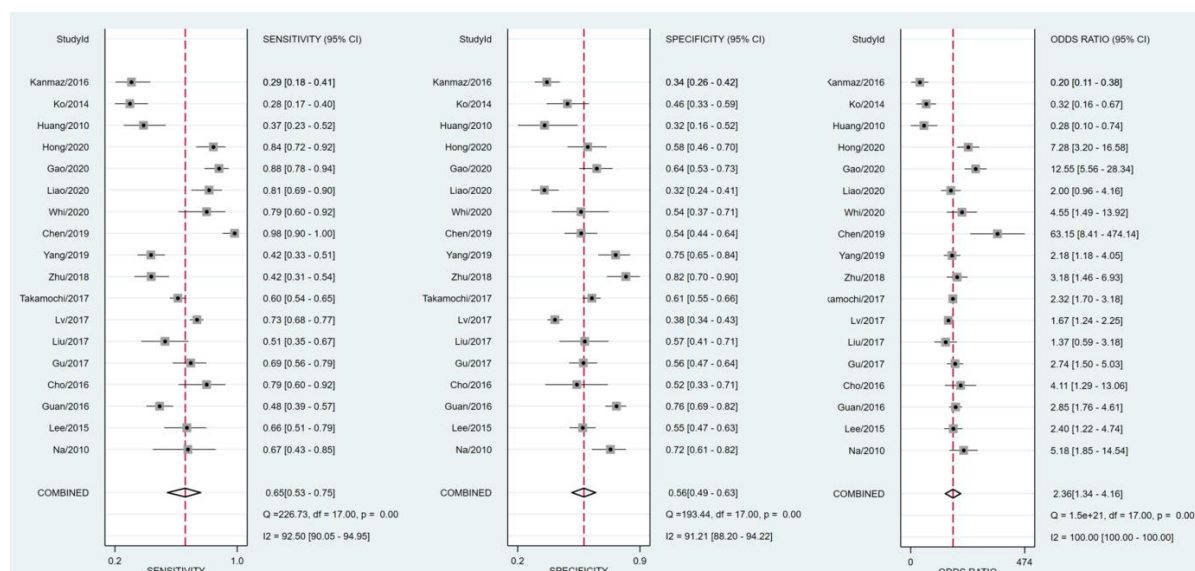

Supplement: bmjopen-2020-044313supp001.pdf [file bmjopen-2020-044313supp001.pdf]
